# Supplementary material for: Palladium-catalyzed C–S bond activation and functionalization of 3-sulfenylindoles and related electron-rich heteroarenes
Source: Royal Society of Chemistry journal article supplement (doi:10.1039/c7qo00215g), 2017-01-01

# Supporting Information

## Palladium-Catalyzed C–S Bond Activation and Functionalization of 3-Sulfenylindoles and Related Electron- Rich Heteroarenes

Jianxiao Li,<sup>‡</sup> Yanni An,<sup>‡</sup> Jiawei Li, Shaorong Yang, Wanqing Wu\* and Huanfeng  
Jiang\*

Key Laboratory of Functional Molecular Engineering of Guangdong Province, School of  
Chemistry and Chemical Engineering, South China University of Technology, Guangzhou 510640,

China

*E-mail: jianghf@scut.edu.cn; Fax and Tel.: (+86) 20-87112906*

### Table of Contents

|                                                              |     |
|--------------------------------------------------------------|-----|
| General methods .....                                        | S2  |
| Typical procedure for the preparation of 3-arylindoles ..... | S2  |
| Characterization data for all products .....                 | S3  |
| X-ray crystallographic analysis for product <b>5o</b> .....  | S27 |
| NMR Spectra for all the compounds .....                      | S28 |

## General methods

Melting points were measured using a melting point instrument and are uncorrected.  $^1\text{H}$  and  $^{13}\text{C}$  NMR spectra were recorded on a 400 MHz NMR spectrometer. The chemical shifts are referenced to signals at 7.24 and 77.0 ppm, respectively, and chloroform was used as a solvent with TMS as the internal standard. IR spectra were obtained with an infrared spectrometer on either potassium bromide pellets or liquid films between two potassium bromide pellets. GC-MS data were obtained using electron ionization. HRMS was carried out on a high-resolution mass spectrometer (LCMS-IT-TOF). TLC was performed using commercially available 100–400 mesh silica gel plates (GF<sub>254</sub>). Unless otherwise noted, purchased chemicals were used without further purification.

## Typical procedure for preparation of 3-arylindoles

A mixture of Pd(PPh<sub>3</sub>)<sub>4</sub> (5 mol %), CuTC (1.2 equiv), 4Å MS (100 mg), and 1,4-dioxane (2 mL) was added to a Schlenk tube equipped with a stir-bar. A balloon filled with N<sub>2</sub> was connected to the Schlenk tube via the side tube and purged 3 times. Then, 3-sulfenylheteroarenes (0.2 mmol), and arylboronic acids (0.3 mmol) were quickly added to the tube under N<sub>2</sub> atmosphere and stirred at 80 °C for 12 h. After the reaction was finished, the N<sub>2</sub> gas was released carefully and the reaction was quenched by water and extracted with CH<sub>2</sub>Cl<sub>2</sub> three times. The combined organic layers were dried over anhydrous Na<sub>2</sub>SO<sub>4</sub> and evaporated under vacuum. The residue was purified by flash column chromatography on silica gel (hexanes/ethyl acetate) to afford the desired products.

## Characterization data for all products

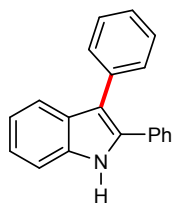

2,3-Diphenyl-1H-indole (**3a**)<sup>[1]</sup> : Yield: 81% (43.6 mg) as a yellow solid; mp = 120.3 - 121.8 °C; <sup>1</sup>H NMR (400 MHz, CDCl<sub>3</sub>) δ 8.13 (s, 1H), 7.67 (d, *J* = 8.0 Hz, 1H), 7.42 (d, *J* = 7.2 Hz, 2H), 7.39 - 7.33 (m, 5H), 7.29 - 7.25 (m, 5H), 7.13 (t, *J* = 7.6 Hz, 1H); <sup>13</sup>C NMR (100 MHz, CDCl<sub>3</sub>) δ 136.0, 135.2, 134.2, 132.8, 130.3, 128.9, 128.7, 128.6, 128.3, 127.8, 126.3, 122.8, 120.6, 119.8, 115.1, 111.0 ppm; ν<sub>max</sub>(KBr)/cm<sup>-1</sup> 3410, 3055, 1602, 1503, 1451, 744; MS (EI) *m/z* 127, 134, 165, 213, 269; HRMS-ESI (*m/z*): calcd for C<sub>20</sub>H<sub>16</sub>N, [M+H]<sup>+</sup>: 270.1277, found 270.1280.

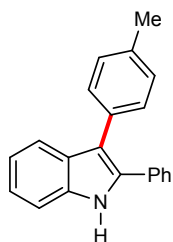

2-Phenyl-3-(*p*-tolyl)-1H-indole (**3b**)<sup>[1]</sup> : Yield: 83% (46.9 mg) as a white solid; mp = 123.3 - 124.8 °C; <sup>1</sup>H NMR (400 MHz, CDCl<sub>3</sub>) δ 8.12 (s, 1H), 7.66 (d, *J* = 8.0 Hz, 1H), 7.62 (d, *J* = 7.6 Hz, 1H), 7.40 (d, *J* = 7.2 Hz, 2H), 7.36 (s, 1H), 7.31 (t, *J* = 6.5 Hz, 3H), 7.27 (s, 1H), 7.19 (dd, *J* = 14.4, 7.6 Hz, 3H), 7.12 (d, *J* = 7.6 Hz, 1H), 2.37 (s, 3H); <sup>13</sup>C NMR (100 MHz, CDCl<sub>3</sub>) δ 136.0, 135.8, 133.9, 132.9, 132.1, 130.1, 129.3, 128.7, 128.2, 127.7, 125.2, 122.7, 120.4, 119.8, 110.9, 100.1, 21.3 ppm; ν<sub>max</sub>(KBr)/cm<sup>-1</sup> 3409, 3054, 2922, 1603, 1484, 743; MS (EI) *m/z* 133, 165, 204, 267, 283; HRMS-ESI (*m/z*): calcd for C<sub>21</sub>H<sub>18</sub>N, [M+H]<sup>+</sup>: 284.1434, found 284.1428.

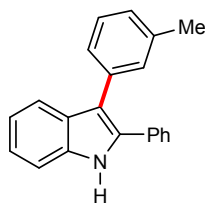

2-Phenyl-3-(*m*-tolyl)-1H-indole (**3c**)<sup>[2]</sup> : Yield: 80% (45.3 mg) as a white solid; mp = 118.7 - 120.5 °C; <sup>1</sup>H NMR (400 MHz, CDCl<sub>3</sub>) δ 8.07 (s, 1H), 7.66 (d, *J* = 8.0 Hz, 1H), 7.36 (dd, *J* = 13.6, 8.0 Hz, 3H), 7.27 - 7.19 (m, 7H), 7.13 (d, *J* = 7.6 Hz, 1H), 7.09 (t, *J* = 7.2 Hz, 1H), 2.32 (s, 3H); <sup>13</sup>C NMR (100 MHz, CDCl<sub>3</sub>) δ 138.1, 136.0, 135.1, 134.1, 132.8, 130.8, 130.3, 128.7, 128.5, 128.2, 127.7, 127.4, 127.1, 122.8, 120.5, 119.9, 115.2, 111.0, 21.6 ppm; ν<sub>max</sub>(KBr)/cm<sup>-1</sup> 3409, 3054, 2923, 1604, 1451, 744; MS (EI) *m/z* 134, 165, 178, 267, 283; HRMS-ESI (*m/z*): calcd for C<sub>21</sub>H<sub>18</sub>N, [M+H]<sup>+</sup>: 284.1434, found 284.1430.

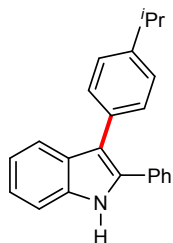

3-(4-Isopropylphenyl)-2-phenyl-1H-indole (**3d**) : Yield: 81% (50.4 mg) as a yellow solid; mp = 74.5 - 76.4 °C; <sup>1</sup>H NMR (400 MHz, CDCl<sub>3</sub>) δ 8.02 (s, 1H), 7.60 (d, *J* = 8.0 Hz, 1H), 7.52 (d, *J* = 7.6 Hz, 1H), 7.31 (d, *J* = 7.2 Hz, 2H), 7.26 (d, *J* = 7.6 Hz, 3H), 7.19 (d, *J* = 7.6 Hz, 2H), 7.16 - 7.10 (m, 3H), 7.06 - 7.02 (m, 1H), 2.84 (dt, *J* = 13.6, 6.8 Hz, 1H), 1.20 (d, *J* = 6.8 Hz, 6H); <sup>13</sup>C NMR (100 MHz, CDCl<sub>3</sub>) δ 146.8, 135.9, 133.9, 132.9, 132.4, 130.0, 128.7, 128.2, 127.6, 126.6, 125.2, 122.7, 120.4, 119.9, 115.1, 110.9, 33.9, 24.1 ppm; ν<sub>max</sub>(KBr)/cm<sup>-1</sup> 3410, 3055, 2926, 1604, 1484, 1410, 743; MS (EI) *m/z* 134, 204, 239, 267, 280, 311; HRMS-ESI (*m/z*): calcd for C<sub>23</sub>H<sub>21</sub>NNa, [M+Na]<sup>+</sup>: 334.1566, found 334.1561.

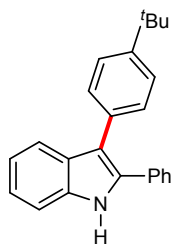

3-(4-(*tert*-Butyl)phenyl)-2-phenyl-1H-indole (**3e**)<sup>[3]</sup> : Yield: 85% (55.3 mg) as a yellow solid; mp = 62.0 - 63.6 °C; <sup>1</sup>H NMR (400 MHz, CDCl<sub>3</sub>) δ 8.11 (s, 1H), 7.69 (d, *J* = 8.0 Hz, 1H), 7.41 (d, *J* = 7.2 Hz, 2H), 7.38 - 7.35 (m, 5H), 7.28 (q, *J* = 7.6 Hz, 3H), 7.23 - 7.18 (m, 1H), 7.12 (t, *J* = 7.2 Hz, 1H), 1.35 (s, 9H); <sup>13</sup>C NMR (100 MHz, CDCl<sub>3</sub>) δ 149.0, 136.0, 133.9, 132.9, 131.9, 130.2, 129.7, 128.7, 128.3, 127.6, 125.5, 122.7, 120.3, 120.0, 115.0, 110.9, 34.6, 31.5 ppm;  $\nu_{\max}$ (KBr)/cm<sup>-1</sup>: 3409, 3056, 2960, 1603, 1452, 744; MS (EI) *m/z* 134, 155, 204, 267, 310, 325; HRMS-ESI (*m/z*): calcd for C<sub>24</sub>H<sub>23</sub>NNa, [M+Na]<sup>+</sup>: 348.1723, found 348.1718.

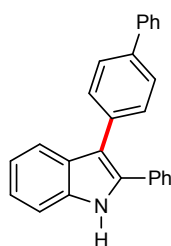

3-([1,1'-Biphenyl]-4-yl)-2-phenyl-1H-indole (**3f**)<sup>[3]</sup> : Yield: 78% (53.8 mg) as a yellow solid; mp = 103.5 - 104.8 °C; <sup>1</sup>H NMR (400 MHz, CDCl<sub>3</sub>) δ 8.13 (s, 1H), 7.72 (d, *J* = 7.6 Hz, 1H), 7.62 (d, *J* = 7.6 Hz, 2H), 7.58 (d, *J* = 7.2 Hz, 2H), 7.48 (d, *J* = 8.0 Hz, 2H), 7.45 - 7.38 (m, 4H), 7.37 - 7.25 (m, 5H), 7.21 (d, *J* = 7.6 Hz, 1H), 7.15 (t, *J* = 7.2 Hz, 1H); <sup>13</sup>C NMR (100 MHz, CDCl<sub>3</sub>) δ 141.0, 138.9, 136.1, 134.4, 134.3, 132.8, 130.6, 128.9, 128.8, 128.4, 128.2, 127.8, 127.3, 127.2, 127.0, 122.8, 120.6, 119.8, 114.7, 111.1 ppm;  $\nu_{\max}$ (KBr)/cm<sup>-1</sup>: 3414, 3055, 2196, 1602, 1488, 1451, 739; MS (EI) *m/z* 77, 134, 165, 207, 254, 315, 345; HRMS-ESI (*m/z*): calcd for C<sub>26</sub>H<sub>19</sub>NNa, [M+Na]<sup>+</sup>: 368.1410, found 368.1407.

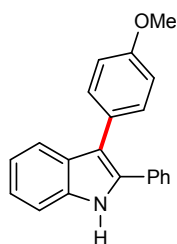

3-(4-Methoxyphenyl)-2-phenyl-1H-indole (**3g**)<sup>[4]</sup>: Yield: 73% (43.7 mg) as a brown solid; mp = 184.2 - 185.8 °C; <sup>1</sup>H NMR (400 MHz, CDCl<sub>3</sub>) δ 8.20 (s, 1H), 7.64 (d, *J* = 8.0 Hz, 1H), 7.40 (d, *J* = 8.4 Hz, 2H), 7.38 - 7.27 (m, 5H), 7.22 (t, *J* = 7.2 Hz, 2H), 7.13 (t, *J* = 7.2 Hz, 1H), 6.92 (d, *J* = 7.2 Hz, 2H), 3.82 (s, 3H); <sup>13</sup>C NMR (100 MHz, CDCl<sub>3</sub>) δ 158.2, 135.9, 133.8, 132.9, 131.2, 129.0, 128.7, 128.1, 127.6, 127.4, 122.7, 120.3, 119.7, 114.7, 114.1, 110.9, 55.3 ppm;  $\nu_{\max}(\text{KBr})/\text{cm}^{-1}$  3409, 3055, 2928, 1606, 1512, 1453, 745; MS (EI) *m/z* 127, 142, 190, 254, 284, 299; HRMS-ESI (*m/z*): calcd for C<sub>21</sub>H<sub>17</sub>NNaO, [M+Na]<sup>+</sup>: 322.1202, found 322.1201.

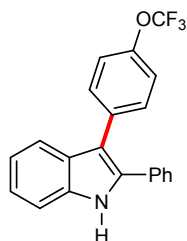

2-Phenyl-3-(4-(trifluoromethoxy)phenyl)-1H-indole (**3h**): Yield: 79% (55.8 mg) as a brown solid; mp = 147.2 - 148.5 °C; <sup>1</sup>H NMR (400 MHz, CDCl<sub>3</sub>) δ 8.20 (s, 1H), 7.66 (d, *J* = 8.0 Hz, 1H), 7.36 (dd, *J* = 12.8, 6.8 Hz, 5H), 7.32 - 7.26 (m, 4H), 7.23 (d, *J* = 7.6 Hz, 1H), 7.16 (t, *J* = 7.6 Hz, 1H), 7.11 (s, 1H); <sup>13</sup>C NMR (100 MHz, CDCl<sub>3</sub>) δ 149.5, 137.3, 135.9, 134.9, 132.2, 129.8, 128.9, 128.5, 128.3, 128.3, 123.0, 122.6, 120.9, 119.3, 118.7, 113.5, 111.1 ppm;  $\nu_{\max}(\text{KBr})/\text{cm}^{-1}$  3417, 3062, 1607, 1533, 1451, 747; MS (EI) *m/z* 134, 165, 190, 267, 353; HRMS-ESI (*m/z*): calcd for C<sub>21</sub>H<sub>14</sub>F<sub>3</sub>NNaO, [M+Na]<sup>+</sup>: 376.0920, found 376.0923.

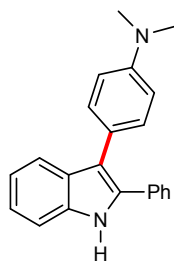

*N,N*-dimethyl-4-(2-phenyl-1H-indol-3-yl)aniline (**3i**): Yield: 66% (41.2 mg) as a yellow solid; mp = 95.6 - 97.3 °C; <sup>1</sup>H NMR (400 MHz, CDCl<sub>3</sub>) δ 8.24 (s, 1H), 7.73 (d, *J* = 8.0 Hz, 1H), 7.53 - 7.48 (m, 2H), 7.44 (d, *J* = 8.0 Hz, 1H), 7.36 (t, *J* = 7.6 Hz, 4H), 7.31 (d, *J* = 7.2 Hz, 1H), 7.25 (d, *J* = 7.6 Hz, 1H), 7.17 (t, *J* = 7.6 Hz, 1H), 3.03 (s, 6H); <sup>13</sup>C NMR (100 MHz, CDCl<sub>3</sub>) δ 148.9, 135.9, 133.4, 133.2, 130.9, 129.2, 128.6, 128.0, 127.4, 122.5, 120.1, 119.9, 115.3, 115.2, 113.0, 110.8, 40.8 ppm; ν<sub>max</sub>(KBr)/cm<sup>-1</sup> 3410, 3052, 1606, 1451, 1328, 748; MS (EI) *m/z* 96, 134, 156, 207, 267, 312; HRMS-ESI (*m/z*): calcd for C<sub>22</sub>H<sub>21</sub>N<sub>2</sub>, [M+H]<sup>+</sup>: 313.1699, found 313.1702.

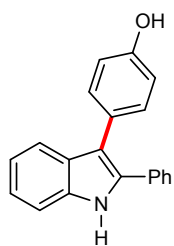

4-(2-Phenyl-1H-indol-3-yl)phenol (**3j**)<sup>[6]</sup>: Yield: 65% (37.1 mg) as a white solid; mp = 134.6 - 136.3 °C; <sup>1</sup>H NMR (400 MHz, CDCl<sub>3</sub>) δ 8.19 (s, 1H), 7.63 (d, *J* = 8.0 Hz, 1H), 7.40 (t, *J* = 6.8 Hz, 3H), 7.34 - 7.26 (m, 5H), 7.22 (d, *J* = 8.8 Hz, 1H), 7.13 (t, *J* = 7.6 Hz, 1H), 6.84 (d, *J* = 8.0 Hz, 2H), 4.92 (s, 1H); <sup>13</sup>C NMR (100 MHz, CDCl<sub>3</sub>) δ 154.1, 135.9, 133.8, 132.8, 131.4, 129.0, 128.7, 128.1, 127.6, 127.5, 122.7, 120.3, 119.7, 115.6, 114.7, 110.9 ppm; ν<sub>max</sub>(KBr)/cm<sup>-1</sup> 3410, 3055, 1608, 1513, 1451, 747; MS (EI) *m/z* 79, 96, 134, 181, 207, 254, 285; HRMS-ESI (*m/z*): calcd for C<sub>20</sub>H<sub>15</sub>NNaO, [M+Na]<sup>+</sup>: 308.1046, found 308.1038.

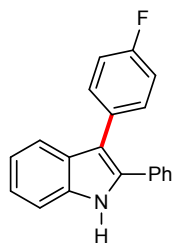

3-(4-Fluorophenyl)-2-phenyl-1H-indole (**3k**)<sup>[4]</sup> : Yield: 78% (44.8 mg) as a white solid; mp = 163.4 - 164.6 °C; <sup>1</sup>H NMR (400 MHz, CDCl<sub>3</sub>) δ 8.14 (s, 1H), 7.61 (d, *J* = 8.0 Hz, 1H), 7.41 - 7.33 (m, 5H), 7.29 (q, *J* = 7.2 Hz, 3H), 7.24 - 7.19 (m, 1H), 7.18 - 7.10 (m, 1H), 7.05 (t, *J* = 8.0 Hz, 2H); <sup>13</sup>C NMR (100 MHz, CDCl<sub>3</sub>) δ 161.67 (d, *J* = 245.0 Hz), 135.9, 134.2, 132.6, 131.68 (d, *J* = 7.8 Hz), 131.04 (d, *J* = 3.3 Hz), 128.8, 128.2, 127.9, 125.2, 122.8, 120.6, 119.5, 115.55 (d, *J* = 21.2 Hz), 114.1, 111.0 ppm; ν<sub>max</sub>(KBr)/cm<sup>-1</sup> 3413, 3056, 1602, 1452, 746; MS (EI) *m/z* 132, 165, 183, 257, 272, 287; HRMS-ESI (*m/z*): calcd for C<sub>20</sub>H<sub>14</sub>FNNa, [M+Na]<sup>+</sup>: 310.1002, found 310.1000.

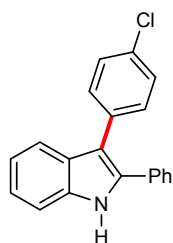

3-(4-Chlorophenyl)-2-phenyl-1H-indole (**3l**)<sup>[4]</sup> : Yield: 80% (48.5 mg) as a white solid; mp = 145.2 - 146.8 °C; <sup>1</sup>H NMR (400 MHz, CDCl<sub>3</sub>) δ 8.24 (s, 1H), 7.72 (d, *J* = 8.0 Hz, 1H), 7.46 (dd, *J* = 7.6, 1.8 Hz, 3H), 7.44 - 7.37 (m, 7H), 7.33 (t, *J* = 7.2 Hz, 1H), 7.25 (t, *J* = 7.2 Hz, 1H); <sup>13</sup>C NMR (100 MHz, CDCl<sub>3</sub>) δ 135.9, 134.5, 133.7, 132.4, 132.1, 131.5, 128.8, 128.9, 128.5, 128.3, 128.0, 122.9, 120.7, 119.5, 113.8, 111.1 ppm; ν<sub>max</sub>(KBr)/cm<sup>-1</sup> 3411, 3048, 1606, 1449, 744; MS (EI) *m/z* 121, 134, 165, 239, 267, 303; HRMS-ESI (*m/z*): calcd for C<sub>20</sub>H<sub>14</sub>ClNNa, [M+Na]<sup>+</sup>: 326.0707, found 326.0710.



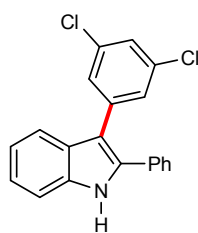

3-(3,5-Dichlorophenyl)-2-phenyl-1H-indole (**3m**): Yield: 72% (48.5 mg) as a yellow solid; mp = 134.5 - 136.3 °C; <sup>1</sup>H NMR (400 MHz, CDCl<sub>3</sub>) δ 8.20 (s, 1H), 7.62 (d, *J* = 8.0 Hz, 1H), 7.35 (dd, *J* = 13.2, 9.6 Hz, 6H), 7.25 (dd, *J* = 11.4, 9.6 Hz, 4H), 7.17 (t, *J* = 7.6 Hz, 1H); <sup>13</sup>C NMR (100 MHz, CDCl<sub>3</sub>) δ 138.5, 135.8, 135.2, 135.0, 131.8, 129.0, 128.4, 128.3, 128.2, 128.1, 126.3, 123.2, 121.0, 119.2, 112.3, 111.2 ppm;  $\nu_{\max}$ (KBr)/cm<sup>-1</sup> 3417, 3061, 1587, 1407, 744; MS (EI) *m/z* 118, 132, 199, 267, 301, 337; HRMS-ESI (*m/z*): calcd for C<sub>20</sub>H<sub>13</sub>Cl<sub>2</sub>NNa, [M+Na]<sup>+</sup>: 360.0317, found 360.0315.

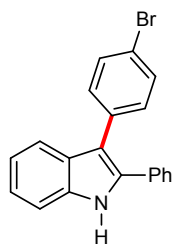

3-(4-Bromophenyl)-2-phenyl-1H-indole (**3n**)<sup>[1]</sup>: Yield: 76% (52.7 mg) as a yellow solid; mp = 123.8 - 125.2 °C; <sup>1</sup>H NMR (400 MHz, CDCl<sub>3</sub>) δ 8.23 (s, 1H), 7.72 (d, *J* = 8.0 Hz, 1H), 7.56 (d, *J* = 7.6 Hz, 2H), 7.46 (d, *J* = 7.6 Hz, 3H), 7.43 - 7.30 (m, 6H), 7.25 (t, *J* = 7.2 Hz, 1H); <sup>13</sup>C NMR (100 MHz, CDCl<sub>3</sub>) δ 136.0, 134.5, 134.2, 132.4, 131.8, 128.9, 128.5, 128.4, 128.3, 128.0, 123.0, 120.7, 120.2, 119.5, 113.8, 111.1 ppm;  $\nu_{\max}$ (KBr)/cm<sup>-1</sup> 3416, 3056, 1601, 1500, 1451, 744; MS (EI) *m/z* 134, 165, 267, 332, 347; HRMS-ESI (*m/z*): calcd for C<sub>20</sub>H<sub>14</sub>BrNNa, [M+Na]<sup>+</sup>: 370.0202, found 370.0204.

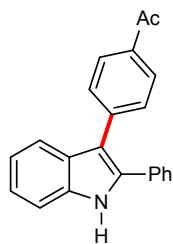

1-(4-(2-Phenyl-1H-indol-3-yl)phenyl)ethanone (**3o**)<sup>[2]</sup> : Yield: 70% (43.5 mg) as a yellow solid; mp = 203.3 - 204.8 °C; <sup>1</sup>H NMR (400 MHz, CDCl<sub>3</sub>) δ 8.40 (s, 1H), 7.96 (d, *J* = 8.0 Hz, 2H), 7.71 (d, *J* = 8.0 Hz, 1H), 7.53 (d, *J* = 8.0 Hz, 2H), 7.43 (dd, *J* = 14.4, 7.6 Hz, 3H), 7.34 (d, *J* = 6.0 Hz, 3H), 7.28 (d, *J* = 7.2 Hz, 1H), 7.18 (t, *J* = 7.6 Hz, 1H), 2.62 (s, 3H); <sup>13</sup>C NMR (100 MHz, CDCl<sub>3</sub>) δ 197.9, 140.7, 136.0, 135.2, 134.8, 132.3, 130.0, 128.9, 128.7, 128.4, 128.2, 128.2, 123.0, 120.9, 119.4, 113.9, 111.1, 26.6 ppm; ν<sub>max</sub>(KBr)/cm<sup>-1</sup> 3395, 3057, 1669, 1601, 1552, 1451, 744; MS (EI) m/z 134, 148, 190, 268, 296, 311; HRMS-ESI (m/z): calcd for C<sub>22</sub>H<sub>17</sub>NNaO, [M+Na]<sup>+</sup>: 334.1202, found 334.1210.

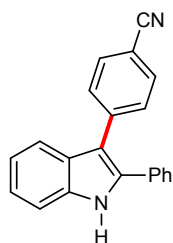

4-(2-Phenyl-1H-indol-3-yl)benzonitrile (**3p**)<sup>[2]</sup> : Yield: 66% (38.8 mg) as a yellow solid; mp = 211.5 - 213.0 °C; <sup>1</sup>H NMR (400 MHz, CDCl<sub>3</sub>) δ 8.38 (s, 1H), 7.67 (d, *J* = 7.6 Hz, 1H), 7.62 (d, *J* = 7.2 Hz, 2H), 7.53 (d, *J* = 7.6 Hz, 2H), 7.45 (d, *J* = 8.0 Hz, 1H), 7.43 - 7.32 (m, 5H), 7.28 (t, *J* = 7.6 Hz, 1H), 7.20 (t, *J* = 7.6 Hz, 1H); <sup>13</sup>C NMR (100 MHz, CDCl<sub>3</sub>) δ 140.5, 136.0, 135.5, 132.3, 132.0, 130.5, 129.0, 128.5, 128.5, 127.9, 123.2, 121.1, 119.3, 119.1, 113.2, 111.3, 109.4 ppm; ν<sub>max</sub>(KBr)/cm<sup>-1</sup> 3395, 3057, 2225, 1668, 1552, 1451, 744; MS (EI) m/z 118, 132, 147, 207, 264, 294; HRMS-ESI (m/z): calcd for C<sub>21</sub>H<sub>14</sub>N<sub>2</sub>Na, [M+Na]<sup>+</sup>: 317.1049, found 317.1049.

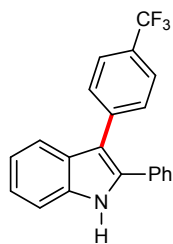

2-Phenyl-3-(4-(trifluoromethyl)phenyl)-1H-indole (**3q**)<sup>[4]</sup> : Yield: 71% (47.8 mg) as a yellow oil;

<sup>1</sup>H NMR (400 MHz, CDCl<sub>3</sub>) δ 8.18 (s, 1H), 7.65 (d, *J* = 8.0 Hz, 1H), 7.58 (d, *J* = 8.0 Hz, 2H),

7.50 (d, *J* = 8.0 Hz, 2H), 7.41 - 7.28 (m, 6H), 7.24 (t, *J* = 7.6 Hz, 1H), 7.16 (t, *J* = 7.6 Hz, 1H); <sup>13</sup>C

NMR (100 MHz, CDCl<sub>3</sub>) δ 139.1, 136.0, 135.1, 132.3, 130.2, 128.9, 128.4, 128.3 (q, *J* = 256.8

Hz), 128.2, 128.1, 125.9, 125.50 (q, *J* = 3.7 Hz), 123.2, 123.1, 120.9, 119.4, 113.6, 111.2 ppm;

$\nu_{\max}$ (KBr)/cm<sup>-1</sup> 3411, 3058, 1613, 1488, 1406, 744; MS (EI) *m/z* 77, 134, 165, 239, 267, 322, 337;

HRMS-ESI (*m/z*): calcd for C<sub>21</sub>H<sub>15</sub>F<sub>3</sub>N, [M+H]<sup>+</sup>: 338.1151, found 338.1150.

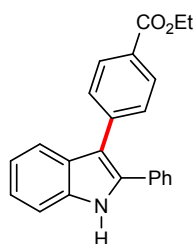

Ethyl 4-(2-phenyl-1H-indol-3-yl)benzoate (**3r**) : Yield: 63% (42.9 mg) as a yellow solid; mp =

134.3 - 135.7 °C; <sup>1</sup>H NMR (400 MHz, CDCl<sub>3</sub>) δ 8.56 (s, 1H), 8.02 (d, *J* = 8.0 Hz, 2H), 7.68 (d, *J* =

8.0 Hz, 1H), 7.48 (d, *J* = 8.0 Hz, 2H), 7.39 (dd, *J* = 10.4, 6.8 Hz, 3H), 7.28 (d, *J* = 5.0 Hz, 3H),

7.24 - 7.19 (m, 1H), 7.16 (t, *J* = 7.6 Hz, 1H), 4.37 (q, *J* = 7.2 Hz, 2H), 1.38 (t, *J* = 7.2 Hz, 3H); <sup>13</sup>C

NMR (100 MHz, CDCl<sub>3</sub>) δ 167.0, 140.4, 136.1, 135.2, 132.4, 129.9, 129.9, 128.8, 128.5, 128.3,

128.1, 127.9, 122.9, 120.8, 119.4, 113.9, 111.2, 61.0, 14.4 ppm;  $\nu_{\max}$ (KBr)/cm<sup>-1</sup> 3344, 3056, 2982,

1695, 1605, 1452, 1274, 742; MS (EI) *m/z* 134, 165, 239, 267, 296, 341; HRMS-ESI (*m/z*): calcd

for C<sub>23</sub>H<sub>19</sub>NNaO<sub>2</sub>, [M+Na]<sup>+</sup>: 364.1308, found 364.1318.

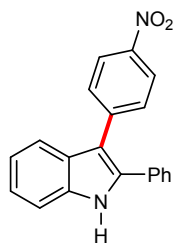

3-(4-Nitrophenyl)-2-phenyl-1H-indole (**3s**) : Yield: 58% (42.9 mg) as a yellow solid; mp = 156.2 - 157.8 °C; <sup>1</sup>H NMR (400 MHz, DMSO)  $\delta$  11.86 (s, 1H), 8.23 (d,  $J$  = 8.0 Hz, 2H), 7.62 (dd,  $J$  = 14.4, 8.2 Hz, 3H), 7.45 (ddd,  $J$  = 24.8, 14.4, 9.2 Hz, 6H), 7.23 (t,  $J$  = 7.6 Hz, 1H), 7.13 (t,  $J$  = 7.6 Hz, 1H); <sup>13</sup>C NMR (100 MHz, DMSO)  $\delta$  145.1, 143.0, 136.3, 131.8, 130.2, 130.0, 128.8, 128.7, 128.3, 127.1, 123.9, 122.5, 120.5, 118.3, 111.8, 111.2 ppm;  $\nu_{\max}$ (KBr)/cm<sup>-1</sup> 3384, 3059, 1668, 1548, 1452, 743; MS (EI)  $m/z$  134, 190, 239, 267, 314; HRMS-ESI ( $m/z$ ): calcd for C<sub>20</sub>H<sub>14</sub>N<sub>2</sub>NaO<sub>2</sub>, [M+Na]<sup>+</sup>: 337.0947, found 337.0949.

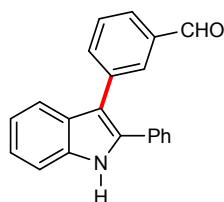

3-(2-Phenyl-1H-indol-3-yl)benzaldehyde (**3t**) : Yield: 54% (32.1 mg) as a yellow solid; mp = 211.3 - 212.9 °C; <sup>1</sup>H NMR (400 MHz, CDCl<sub>3</sub>)  $\delta$  9.99 (s, 1H), 8.36 (s, 1H), 7.97 (t,  $J$  = 1.6 Hz, 1H), 7.81 (dt,  $J$  = 7.6, 1.2 Hz, 1H), 7.67 (ddd,  $J$  = 8.0, 3.6, 2.0 Hz, 2H), 7.51 (t,  $J$  = 7.6 Hz, 1H), 7.46 (d,  $J$  = 8.0 Hz, 1H), 7.42 - 7.38 (m, 2H), 7.36 - 7.31 (m, 3H), 7.28 (dd,  $J$  = 7.2, 1.0 Hz, 1H), 7.20 - 7.16 (m, 1H); <sup>13</sup>C NMR (100 MHz, CDCl<sub>3</sub>)  $\delta$  192.5, 136.9, 136.4, 136.3, 135.9, 134.8, 132.2, 131.8, 129.3, 128.9, 128.4, 128.3, 128.1, 127.1, 123.0, 120.8, 119.2, 113.5, 111.1 ppm;  $\nu_{\max}$ (KBr)/cm<sup>-1</sup> 3390, 3056, 1688, 1494, 1452, 742; MS (EI)  $m/z$  106, 134, 165, 239, 267, 297; HRMS-ESI ( $m/z$ ): calcd for C<sub>21</sub>H<sub>15</sub>NNaO, [M+Na]<sup>+</sup>: 320.1046, found 320.1038

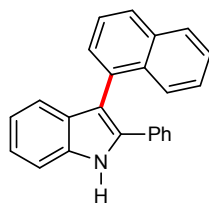

3-(Naphthalen-1-yl)-2-phenyl-1H-indole (**3u**)<sup>[4]</sup> : Yield: 75% (47.8 mg) as a yellow oil; <sup>1</sup>H NMR (400 MHz, CDCl<sub>3</sub>) δ 8.29 (s, 1H), 7.86 (dd, *J* = 16.4, 8.0 Hz, 2H), 7.77 (d, *J* = 8.4 Hz, 1H), 7.48 - 7.37 (m, 4H), 7.28 - 7.17 (m, 5H), 7.13 - 7.07 (m, 3H), 7.03 (t, *J* = 7.6 Hz, 1H); <sup>13</sup>C NMR (100 MHz, CDCl<sub>3</sub>) δ 135.9, 135.1, 134.1, 133.1, 133.1, 132.5, 130.5, 129.2, 128.7, 128.3, 127.6, 127.5, 127.3, 126.8, 125.9, 125.9, 125.8, 122.8, 120.4, 120.4, 113.5, 110.9 ppm; *v*<sub>max</sub>(KBr)/cm<sup>-1</sup> 3417, 3053, 1597, 1488, 1451, 744; MS (EI) *m/z* 121, 158, 215, 241, 319; HRMS-ESI (*m/z*): calcd for C<sub>24</sub>H<sub>18</sub>N, [M+H]<sup>+</sup>: 320.1434, found 320.1428.

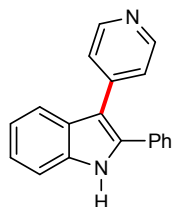

2-Phenyl-3-(pyridin-4-yl)-1H-indole (**3v**) : Yield: 63% (34.0 mg) as a yellow solid; mp = 252.6 - 253.8 °C; <sup>1</sup>H NMR (400 MHz, CDCl<sub>3</sub>) δ 8.64 (s, 1H), 8.56 (s, 2H), 7.74 (d, *J* = 8.0 Hz, 1H), 7.45 (dd, *J* = 13.4, 6.4 Hz, 3H), 7.40 - 7.32 (m, 5H), 7.29 (t, *J* = 7.6 Hz, 1H), 7.21 (t, *J* = 7.6 Hz, 1H); <sup>13</sup>C NMR (100 MHz, CDCl<sub>3</sub>) δ 149.6, 143.8, 136.1, 136.0, 131.9, 129.0, 128.6, 128.5, 127.7, 124.7, 123.2, 121.1, 119.2, 112.0, 111.3 ppm; *v*<sub>max</sub>(KBr)/cm<sup>-1</sup> 3394, 3061, 1661, 1452, 1406, 737; MS (EI) *m/z* 121, 135, 189, 241, 270; HRMS-ESI (*m/z*): calcd for C<sub>19</sub>H<sub>15</sub>N<sub>2</sub>, [M+H]<sup>+</sup>: 271.1230, found 271.1237.

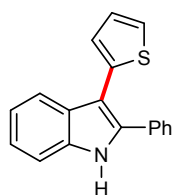

2-Phenyl-3-(thiophen-2-yl)-1H-indole (**3w**)<sup>[5]</sup> : Yield: 69% (37.9 mg) as a white solid; mp = 126.4 - 127.7 °C; <sup>1</sup>H NMR (400 MHz, CDCl<sub>3</sub>) δ 8.12 (s, 1H), 7.77 (d, *J* = 8.0 Hz, 1H), 7.45 (d, *J* = 7.2 Hz, 2H), 7.31 (dd, *J* = 6.8, 4.4 Hz, 4H), 7.23 (dd, *J* = 17.6, 6.4 Hz, 2H), 7.16 (t, *J* = 7.4 Hz, 1H), 7.03 (d, *J* = 5.6 Hz, 2H); <sup>13</sup>C NMR (100 MHz, CDCl<sub>3</sub>) δ 136.5, 135.7, 135.3, 132.4, 128.9, 128.7, 128.5, 128.2, 127.3, 126.3, 124.7, 123.0, 120.8, 120.0, 111.0, 108.0 ppm; ν<sub>max</sub>(KBr)/cm<sup>-1</sup> 3406, 3058, 1603, 1485, 1409, 743; MS (EI) *m/z* 77, 121, 137, 171, 241, 275; HRMS-ESI (*m/z*): calcd for C<sub>18</sub>H<sub>13</sub>NNaS, [M+Na]<sup>+</sup>: 298.0661, found 298.0662.

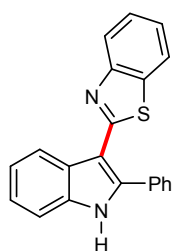

2-(2-Phenyl-1H-indol-3-yl)benzo[d]thiazole (**3x**) : Yield: 57% (37.2 mg) as a brown solid; mp = 215.7 - 217.4 °C; <sup>1</sup>H NMR (400 MHz, CDCl<sub>3</sub>) δ 8.58 (s, 1H), 8.54 (d, *J* = 7.2 Hz, 1H), 8.03 (d, *J* = 8.0 Hz, 1H), 7.73 (d, *J* = 8.0 Hz, 1H), 7.59 (d, *J* = 7.2 Hz, 2H), 7.42 (m, 5H), 7.34 - 7.26 (m, 3H); <sup>13</sup>C NMR (100 MHz, CDCl<sub>3</sub>) δ 162.6, 153.6, 139.7, 135.6, 134.6, 131.5, 129.9, 129.5, 128.9, 127.3, 125.7, 124.3, 123.6, 122.5, 121.9, 121.8, 121.1, 110.9, 109.1 ppm; ν<sub>max</sub>(KBr)/cm<sup>-1</sup> 3405, 3058, 1615, 1502, 1446, 749; MS (EI) *m/z* 146, 163, 207, 292, 326; HRMS-ESI (*m/z*): calcd for C<sub>21</sub>H<sub>15</sub>N<sub>2</sub>S, [M+H]<sup>+</sup>: 327.0950, found 327.0953.

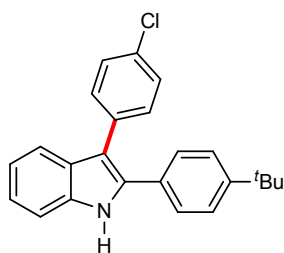

2-(4-(*tert*-Butyl)phenyl)-3-(4-chlorophenyl)-1H-indole (**5a**) : Yield: 83% (59.6 mg) as a yellow solid; mp = 131.2 - 132.6 °C; <sup>1</sup>H NMR (400 MHz, CDCl<sub>3</sub>) δ 8.15 (s, 1H), 7.60 (d, *J* = 8.0 Hz, 1H), 7.40 - 7.30 (m, 9H), 7.21 (t, *J* = 7.6 Hz, 1H), 7.13 (t, *J* = 7.2 Hz, 1H), 1.31 (s, 9H); <sup>13</sup>C NMR (100 MHz, CDCl<sub>3</sub>) δ 151.1, 135.9, 134.5, 133.9, 131.9, 131.5, 129.5, 128.8, 128.7, 127.8, 125.8, 122.7, 120.6, 119.3, 113.4, 111.0, 34.7, 31.3 ppm; ν<sub>max</sub>(KBr)/cm<sup>-1</sup> 3416, 3055, 2962, 1567, 1485, 1433, 1266, 742; MS (EI) *m/z* 77, 119, 141, 207, 267, 309, 344, 359; HRMS-ESI (*m/z*): calcd for C<sub>24</sub>H<sub>22</sub>ClNNa, [M+Na]<sup>+</sup>: 382.1333, found 382.1337.

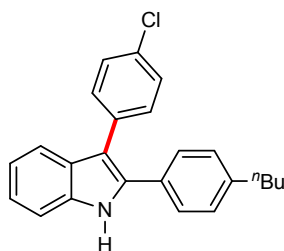

2-(4-Butylphenyl)-3-(4-chlorophenyl)-1H-indole (**5b**): Yield: 80% (57.4 mg) as a yellow oil; <sup>1</sup>H NMR (400 MHz, CDCl<sub>3</sub>) δ 8.15 (s, 1H), 7.61 (d, *J* = 8.0 Hz, 1H), 7.40 - 7.30 (m, 5H), 7.28 (d, *J* = 7.6 Hz, 2H), 7.21 (d, *J* = 7.6 Hz, 1H), 7.14 (t, *J* = 7.2 Hz, 3H), 2.60 (t, *J* = 7.6 Hz, 2H), 1.66 - 1.55 (m, 2H), 1.42 - 1.31 (m, 2H), 0.93 (t, *J* = 7.2 Hz, 3H); <sup>13</sup>C NMR (100 MHz, CDCl<sub>3</sub>) δ 142.9, 135.8, 134.6, 133.8, 131.9, 131.4, 129.7, 128.9, 128.8, 128.6, 128.1, 122.7, 120.6, 119.3, 113.4, 110.9, 35.4, 33.5, 22.5, 14.0 ppm; ν<sub>max</sub>(KBr)/cm<sup>-1</sup> 3410, 3054, 2927, 1644, 1510, 1454, 745; MS (EI) *m/z* 139, 165, 207, 280, 316, 359; HRMS-ESI (*m/z*): calcd for C<sub>24</sub>H<sub>22</sub>ClNNa, [M+Na]<sup>+</sup>: 382.1333, found 382.1335.

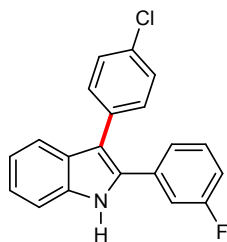

3-(4-Chlorophenyl)-2-(3-fluorophenyl)-1H-indole (**5c**) : Yield: 75% (48.2 mg) as a yellow solid; mp = 121.7 - 123.2 °C; <sup>1</sup>H NMR (400 MHz, CDCl<sub>3</sub>) δ 8.16 (s, 1H), 7.60 (d, *J* = 7.6 Hz, 1H), 7.38 (d, *J* = 8.0 Hz, 1H), 7.36 - 7.29 (m, 4H), 7.26 (dd, *J* = 15.6, 8.0 Hz, 2H), 7.18 - 7.11 (m, 2H), 7.07 (d, *J* = 10.0 Hz, 1H), 6.97 (t, *J* = 8.4 Hz, 1H); <sup>13</sup>C NMR (100 MHz, CDCl<sub>3</sub>) δ 162.9 (d, *J* = 246.4 Hz), 136.0, 134.5 (d, *J* = 8.1 Hz), 133.2, 132.9 (d, *J* = 2.4 Hz), 132.4, 131.4, 130.5 (d, *J* = 8.5 Hz), 128.9, 128.5, 123.9 (d, *J* = 3.0 Hz), 123.3, 120.9, 119.6, 115.0 (d, *J* = 10.9 Hz), 114.8, 114.7 (d, *J* = 9.3 Hz), 111.1 ppm; ν<sub>max</sub>(KBr)/cm<sup>-1</sup> 3416, 3057, 1693, 1612, 1584, 1454, 744; MS (EI) *m/z* 106, 143, 183, 257, 285, 321; HRMS-ESI (*m/z*): calcd for C<sub>20</sub>H<sub>13</sub>ClFNNa, [M+Na]<sup>+</sup>: 344.0613, found 344.0611.

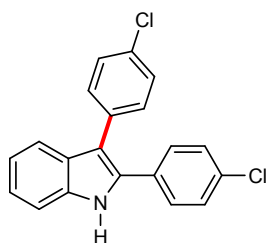

2,3-Bis(4-chlorophenyl)-1H-indole (**5d**)<sup>[7]</sup> : Yield: 80% (53.9 mg) as a yellow solid; mp = 133.5 - 135.3 °C; <sup>1</sup>H NMR (400 MHz, CDCl<sub>3</sub>) δ 8.16 (s, 1H), 7.60 (d, *J* = 8.0 Hz, 1H), 7.39 (d, *J* = 8.0 Hz, 1H), 7.32 (dd, *J* = 13.2, 11.4 Hz, 8H), 7.25 - 7.21 (m, 1H), 7.15 (t, *J* = 7.6 Hz, 1H); <sup>13</sup>C NMR (100 MHz, CDCl<sub>3</sub>) δ 135.9, 133.9, 133.3, 133.1, 132.3, 131.4, 130.9, 129.4, 129.1, 128.9, 128.5, 123.2, 120.8, 119.5, 114.3, 111.1 ppm; ν<sub>max</sub>(KBr)/cm<sup>-1</sup> 3428, 3054, 1660, 1546, 1453, 743; MS (EI) *m/z* 134, 165, 239, 267, 301, 337; HRMS-ESI (*m/z*): calcd for C<sub>20</sub>H<sub>13</sub>Cl<sub>2</sub>NNa, [M+Na]<sup>+</sup>: 360.0317, found 360.0314.



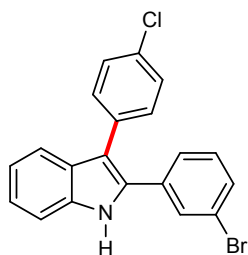

2-(3-Bromophenyl)-3-(4-chlorophenyl)-1H-indole (**5e**): Yield: 76% (57.8 mg) as a yellow solid; mp = 141.5 - 142.7 °C; <sup>1</sup>H NMR (400 MHz, CDCl<sub>3</sub>) δ 8.16 (s, 1H), 7.60 (d, *J* = 8.0 Hz, 1H), 7.56 (s, 1H), 7.43 - 7.36 (m, 2H), 7.32 (q, *J* = 8.6 Hz, 4H), 7.24 (dd, *J* = 12.4, 7.2 Hz, 2H), 7.14 (dd, *J* = 17.6, 8.0 Hz, 2H); <sup>13</sup>C NMR (100 MHz, CDCl<sub>3</sub>) δ 136.0, 134.5, 133.1, 132.6, 132.4, 131.4, 130.9, 130.7, 130.3, 128.9, 128.4, 127.1, 123.4, 122.9, 120.9, 119.6, 114.7, 111.2 ppm; *v*<sub>max</sub>(KBr)/cm<sup>-1</sup> 3421, 3056, 1595, 1452, 744; MS (EI) *m/z* 118, 134, 207, 267, 345, 381; HRMS-ESI (*m/z*): calcd for C<sub>20</sub>H<sub>13</sub>BrClNNa, [M+Na]<sup>+</sup>: 403.9812, found 403.9810.

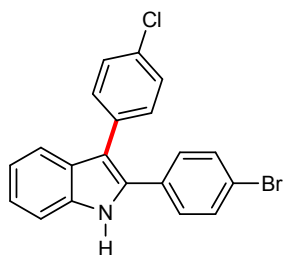

2-(4-Bromophenyl)-3-(4-chlorophenyl)-1H-indole (**5f**): Yield: 73% (55.6 mg) as a yellow solid; mp = 139.3 - 140.9 °C; <sup>1</sup>H NMR (400 MHz, CDCl<sub>3</sub>) δ 8.14 (s, 1H), 7.60 (d, *J* = 8.0 Hz, 1H), 7.42 (d, *J* = 7.6 Hz, 2H), 7.37 (d, *J* = 8.0 Hz, 1H), 7.35 - 7.28 (m, 4H), 7.22 (t, *J* = 7.6 Hz, 3H), 7.14 (t, *J* = 7.6 Hz, 1H); <sup>13</sup>C NMR (100 MHz, CDCl<sub>3</sub>) δ 136.0, 133.3, 133.1, 132.3, 132.1, 131.4, 131.3, 129.7, 128.9, 128.5, 123.3, 122.1, 120.9, 119.5, 114.4, 111.1 ppm; *v*<sub>max</sub>(KBr)/cm<sup>-1</sup> 3422, 3053, 1544, 1495, 1452, 743; MS (EI) *m/z* 134, 165, 207, 267, 345, 381; HRMS-ESI (*m/z*): calcd for C<sub>20</sub>H<sub>13</sub>BrClNNa, [M+Na]<sup>+</sup>: 403.9812, found 403.9806.

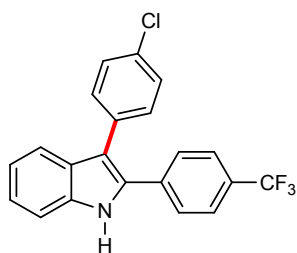

3-(4-Chlorophenyl)-2-(4-(trifluoromethyl)phenyl)-1H-indole (**5g**): Yield: 72% (55.6 mg) as a yellow solid; mp = 115.2 - 116.8 °C; <sup>1</sup>H NMR (400 MHz, CDCl<sub>3</sub>) δ 8.24 (s, 1H), 7.59 (dd, *J* = 16.8, 8.0 Hz, 3H), 7.48 (d, *J* = 8.0 Hz, 2H), 7.42 (d, *J* = 8.0 Hz, 1H), 7.38 - 7.24 (m, 5H), 7.17 (t, *J* = 7.6 Hz, 1H); <sup>13</sup>C NMR (100 MHz, CDCl<sub>3</sub>) δ 136.2, 135.9, 133.0, 132.6, 132.5, 131.4, 129.7 (q, *J* = 32.7 Hz), 129.1, 128.5, 128.2, 125.8 (d, *J* = 3.8 Hz), 123.6, 121.0, 119.7, 115.4, 111.2 ppm;  $\nu_{\max}$ (KBr)/cm<sup>-1</sup> 3419, 3057, 1616, 1486, 1402, 744; MS (EI) *m/z* 134, 165, 207, 267, 335, 371; HRMS-ESI (*m/z*): calcd for C<sub>21</sub>H<sub>13</sub>ClF<sub>3</sub>NNa, [M+Na]<sup>+</sup>: 394.0581, found 394.0577.

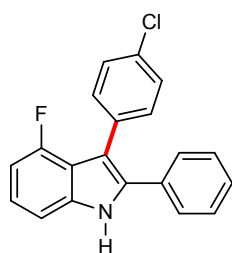

3-(4-Chlorophenyl)-4-fluoro-2-phenyl-1H-indole (**5h**): Yield: 79% (50.7 mg) as a white solid; mp = 107.2 - 108.8 °C; <sup>1</sup>H NMR (400 MHz, CDCl<sub>3</sub>) δ 8.44 (s, 1H), 7.40 - 7.31 (m, 9H), 7.24 (d, *J* = 8.0 Hz, 1H), 7.17 (td, *J* = 8.0, 4.8 Hz, 1H), 6.83 (ddd, *J* = 11.4, 7.6, 0.8 Hz, 1H); <sup>13</sup>C NMR (100 MHz, CDCl<sub>3</sub>) δ 157.0 (d, *J* = 248.7 Hz), 138.3 (d, *J* = 10.6 Hz), 134.7 (d, *J* = 1.2 Hz), 133.4 (d, *J* = 1.0 Hz), 132.4, 132.2 (d, *J* = 2.4 Hz), 131.9, 128.8, 128.3, 128.2, 128.1, 123.1 (d, *J* = 8.1 Hz), 117.1 (d, *J* = 18.1 Hz), 112.0 (d, *J* = 2.9 Hz), 107.1 (d, *J* = 3.7 Hz), 105.9 (d, *J* = 20.1 Hz) ppm;  $\nu_{\max}$ (KBr)/cm<sup>-1</sup> 3410, 3052, 1618, 1540, 1438, 746; MS (EI) *m/z* 96, 134, 143, 207, 285, 321; HRMS-ESI (*m/z*): calcd for C<sub>20</sub>H<sub>14</sub>ClFN, [M+H]<sup>+</sup>: 322.0793, found 322.0796.

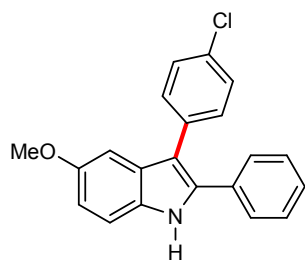

3-(4-Chlorophenyl)-5-methoxy-2-phenyl-1H-indole (**5i**): Yield: 73% (48.6 mg) as a white solid; mp = 218.4 - 219.8 °C; <sup>1</sup>H NMR (400 MHz, CDCl<sub>3</sub>) δ 8.13 (s, 1H), 7.37 - 7.32 (m, 6H), 7.28 (t, *J* = 8.0 Hz, 4H), 7.05 (s, 1H), 6.89 (d, *J* = 8.8 Hz, 1H), 3.80 (s, 3H); <sup>13</sup>C NMR (100 MHz, CDCl<sub>3</sub>) δ 155.0, 135.3, 133.8, 132.5, 132.0, 131.4, 131.1, 129.0, 128.9, 128.8, 128.1, 127.9, 113.7, 113.1, 111.9, 101.1, 56.0 ppm; ν<sub>max</sub>(KBr)/cm<sup>-1</sup> 3300, 3057, 2924, 1609, 1501, 1471, 1092, 737; MS (EI) *m/z* 105, 127, 162, 254, 290, 318, 333; HRMS-ESI (*m/z*): calcd for C<sub>21</sub>H<sub>16</sub>ClNNaO, [M+Na]<sup>+</sup>: 356.0813, found 356.0810.

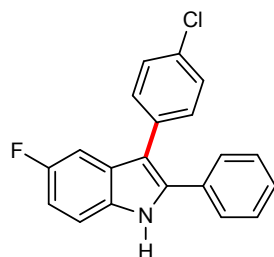

3-(4-Chlorophenyl)-5-fluoro-2-phenyl-1H-indole (**5j**): Yield: 80% (51.4 mg) as a white solid; mp = 105.3 - 106.9 °C; <sup>1</sup>H NMR (400 MHz, CDCl<sub>3</sub>) δ 8.25 (s, 1H), 7.40 - 7.25 (m, 11H), 6.97 (t, *J* = 8.8 Hz, 1H); <sup>13</sup>C NMR (100 MHz, CDCl<sub>3</sub>) δ 158.6 (d, *J* = 235.5 Hz), 136.2, 133.2, 132.4, 132.2, 132.1, 131.2, 129.1 (d, *J* = 8.4 Hz), 128.9 (d, *J* = 2.2 Hz), 128.2, 128.0, 125.2, 113.9 (d, *J* = 4.8 Hz), 111.8 (d, *J* = 9.6 Hz), 111.2 (d, *J* = 26.4 Hz), 104.3 (d, *J* = 24.2 Hz)ppm; ν<sub>max</sub>(KBr)/cm<sup>-1</sup> 3440, 3055, 1626, 1480, 1415, 761; MS (EI) *m/z* 106, 143, 183, 285, 321; HRMS-ESI (*m/z*): calcd for C<sub>20</sub>H<sub>13</sub>ClFNNa, [M+Na]<sup>+</sup>: 344.0613, found 344.0607.

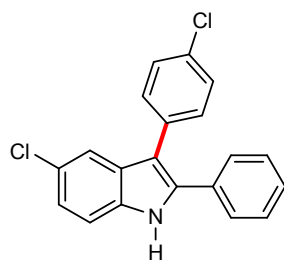

5-Chloro-3-(4-chlorophenyl)-2-phenyl-1H-indole (**5k**): Yield: 83% (55.9 mg) as a yellow solid; mp = 109.8 - 111.4 °C;  $^1\text{H}$  NMR (400 MHz,  $\text{CDCl}_3$ )  $\delta$  8.26 (s, 1H), 7.57 (s, 1H), 7.33 (dt,  $J$  = 11.2, 7.0 Hz, 10H), 7.18 (d,  $J$  = 8.4 Hz, 1H);  $^{13}\text{C}$  NMR (100 MHz,  $\text{CDCl}_3$ )  $\delta$  135.7, 134.2, 132.9, 132.4, 131.9, 131.3, 129.6, 128.9, 128.9, 128.3, 128.2, 126.4, 123.1, 118.7, 113.5, 112.0 ppm;  $\nu_{\text{max}}(\text{KBr})/\text{cm}^{-1}$  3425, 3060, 1660, 1547, 1501, 1461, 750; MS (EI)  $m/z$  106, 134, 199, 267, 301, 337; HRMS-ESI ( $m/z$ ): calcd for  $\text{C}_{20}\text{H}_{13}\text{Cl}_2\text{NNa}$ ,  $[\text{M}+\text{Na}]^+$ : 360.0317, found 360.0318.

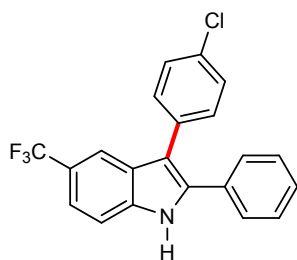

3-(4-Chlorophenyl)-2-phenyl-5-(trifluoromethyl)-1H-indole (**5l**): Yield: 68% (50.5 mg) as a yellow solid; mp = 116.3 - 117.5 °C;  $^1\text{H}$  NMR (400 MHz,  $\text{CDCl}_3$ )  $\delta$  8.52 (s, 1H), 7.88 (s, 1H), 7.50 - 7.44 (m, 2H), 7.41 - 7.30 (m, 9H);  $^{13}\text{C}$  NMR (100 MHz,  $\text{CDCl}_3$ )  $\delta$  137.2, 136.1, 132.7, 132.7, 131.7, 131.3, 129.1, 128.9, 128.5, 128.2, 128.0, 123.4 (q,  $J$  = 32.9 Hz), 119.5 (q,  $J$  = 3.1 Hz), 117.1 (q,  $J$  = 4.3 Hz), 114.5, 111.3 ppm;  $\nu_{\text{max}}(\text{KBr})/\text{cm}^{-1}$  3422, 3055, 1594, 1494, 1451, 744; MS (EI)  $m/z$  134, 158, 207, 267, 335, 371; HRMS-ESI ( $m/z$ ): calcd for  $\text{C}_{21}\text{H}_{14}\text{ClF}_3\text{N}$ ,  $[\text{M}+\text{H}]^+$ : 372.0761, found 372.0756.

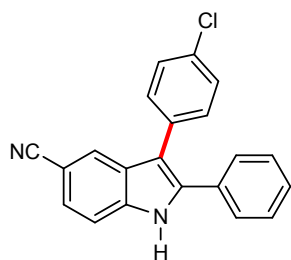

3-(4-Chlorophenyl)-2-phenyl-1H-indole-5-carbonitrile (**5m**): Yield: 60% (39.4 mg) as a yellow solid; mp = 146.8 - 148.2 °C; <sup>1</sup>H NMR (400 MHz, CDCl<sub>3</sub>) δ 8.89 (s, 1H), 7.93 (s, 1H), 7.50 (d, *J* = 8.4 Hz, 1H), 7.42 (dd, *J* = 11.2, 7.6 Hz, 3H), 7.36 (t, *J* = 7.0 Hz, 5H), 7.30 (d, *J* = 8.0 Hz, 2H); <sup>13</sup>C NMR (100 MHz, CDCl<sub>3</sub>) δ 137.6, 136.6, 132.9, 132.2, 131.2, 129.1, 129.0, 128.7, 128.4, 128.3, 128.0, 125.6, 125.0, 120.7, 114.1, 112.0, 103.5 ppm; ν<sub>max</sub>(KBr)/cm<sup>-1</sup> 3416, 3056, 1621, 1588, 1450, 735; MS (EI) *m/z* 105, 134, 190, 207, 292, 328; HRMS-ESI (*m/z*): calcd for C<sub>21</sub>H<sub>13</sub>ClN<sub>2</sub>Na, [M+Na]<sup>+</sup>: 351.0659, found 351.0663.

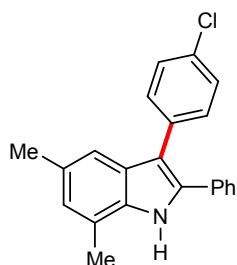

3-(4-Chlorophenyl)-5,7-dimethyl-2-phenyl-1H-indole (**5n**): Yield: 78% (51.6 mg) as a yellow solid; mp = 220.3 - 221.9 °C; <sup>1</sup>H NMR (400 MHz, CDCl<sub>3</sub>) δ 8.02 (s, 1H), 7.41 (d, *J* = 7.6 Hz, 2H), 7.37 - 7.28 (m, 7H), 7.26 (s, 1H), 6.89 (s, 1H), 2.51 (s, 3H), 2.41 (s, 3H); <sup>13</sup>C NMR (100 MHz, CDCl<sub>3</sub>) δ 134.3, 134.0, 133.8, 132.7, 131.9, 131.4, 130.3, 128.8, 128.7, 128.4, 128.2, 127.8, 125.2, 119.9, 116.6, 113.9, 21.5, 16.6 ppm; ν<sub>max</sub>(KBr)/cm<sup>-1</sup> 3438, 3052, 2920, 1603, 1498, 1447, 741; MS (EI) *m/z* 140, 178, 207, 281, 295, 331; HRMS-ESI (*m/z*): calcd for C<sub>22</sub>H<sub>18</sub>ClNNa, [M+Na]<sup>+</sup>: 354.1020, found 354.1017.

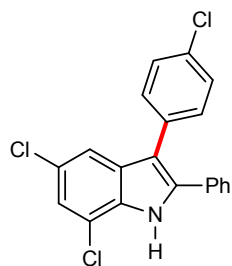

5,7-Dichloro-3-(4-chlorophenyl)-2-phenyl-1H-indole (**5o**): Yield: 66% (48.9 mg) as a yellow solid; mp = 215.5 - 216.8 °C;  $^1\text{H}$  NMR (400 MHz,  $\text{CDCl}_3$ )  $\delta$  8.40 (s, 1H), 7.47 (s, 1H), 7.43 - 7.32 (m, 7H), 7.28 (d,  $J$  = 8.4 Hz, 2H), 7.24 (d,  $J$  = 4.0 Hz, 1H);  $^{13}\text{C}$  NMR (100 MHz,  $\text{CDCl}_3$ )  $\delta$  136.4, 132.8, 132.4, 131.7, 131.4, 131.2, 130.3, 129.0, 128.9, 128.7, 128.3, 126.4, 122.2, 117.7, 116.9, 114.4 ppm;  $\nu_{\text{max}}(\text{KBr})/\text{cm}^{-1}$  3432, 3058, 1617, 1501, 1467, 740; MS (EI)  $m/z$  118, 132, 150, 197, 264, 301, 335, 371; HRMS-ESI ( $m/z$ ): calcd for  $\text{C}_{20}\text{H}_{12}\text{Cl}_3\text{NNa}$ ,  $[\text{M}+\text{Na}]^+$ : 393.9928, found 393.9924.

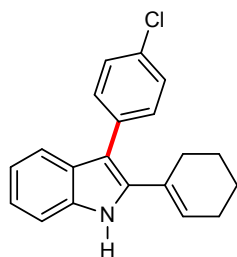

3-(4-Chlorophenyl)-2-(cyclohex-1-en-1-yl)-1H-indole (**5p**): Yield: 65% (36.8 mg) as a yellow oil;  $^1\text{H}$  NMR (400 MHz,  $\text{CDCl}_3$ )  $\delta$  8.05 (s, 1H), 7.58 (d,  $J$  = 8.0 Hz, 1H), 7.50 - 7.45 (m, 2H), 7.44 - 7.40 (m, 2H), 7.37 (d,  $J$  = 8.0 Hz, 1H), 7.25 - 7.20 (m, 1H), 7.17 - 7.11 (m, 1H), 6.12 - 6.06 (m, 1H), 2.24 - 2.14 (m, 4H), 1.71 - 1.66 (m, 4H);  $^{13}\text{C}$  NMR (100 MHz,  $\text{CDCl}_3$ )  $\delta$  136.7, 134.8, 134.5, 131.7, 131.0, 130.7, 128.9, 128.5, 122.3, 120.3, 118.9, 112.4, 110.6, 27.8, 25.7, 22.7, 21.9 ppm;  $\nu_{\text{max}}(\text{KBr})/\text{cm}^{-1}$  3408, 3052, 2926, 1602, 1496, 1416, 746; MS (EI)  $m/z$  115, 168, 230, 264, 272, 307; HRMS-ESI ( $m/z$ ): calcd for  $\text{C}_{20}\text{H}_{19}\text{ClN}$ ,  $[\text{M}+\text{H}]^+$ : 308.1201, found 308.1198.

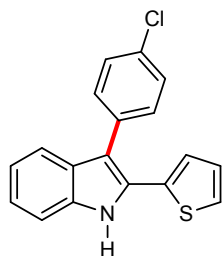

3-(4-Chlorophenyl)-2-(thiophen-2-yl)-1H-indole (**5q**): Yield: 67% (41.4 mg) as a yellow oil;  $^1\text{H}$  NMR (400 MHz,  $\text{CDCl}_3$ )  $\delta$  8.21 (s, 1H), 7.56 (d,  $J = 8.0$  Hz, 1H), 7.41 - 7.33 (m, 5H), 7.29 - 7.23 (m, 2H), 7.20 (d,  $J = 6.0$  Hz, 1H), 7.12 (dd,  $J = 14.8, 7.2$  Hz, 1H), 7.01 (t,  $J = 6.4$  Hz, 1H);  $^{13}\text{C}$  NMR (100 MHz,  $\text{CDCl}_3$ )  $\delta$  135.7, 133.6, 133.3, 132.3, 131.5, 129.8, 128.8, 128.6, 126.9, 126.3, 122.9, 122.4, 120.7, 119.3, 113.7, 110.9 ppm;  $\nu_{\text{max}}(\text{KBr})/\text{cm}^{-1}$  3419, 3054, 1662, 1511, 1455, 744; MS (EI)  $m/z$  100, 114, 137, 241, 273, 309; HRMS-ESI ( $m/z$ ): calcd for  $\text{C}_{18}\text{H}_{13}\text{ClNS}$ ,  $[\text{M}+\text{H}]^+$ : 310.0452, found 310.0447.

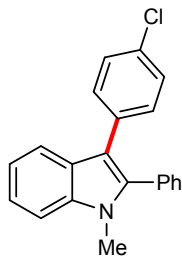

3-(4-Chlorophenyl)-1-methyl-2-phenyl-1H-indole (**5r**): Yield: 86% (54.5 mg) as a yellow solid; mp = 163.5 - 164.7  $^{\circ}\text{C}$ ;  $^1\text{H}$  NMR (400 MHz,  $\text{CDCl}_3$ )  $\delta$  7.73 (d,  $J = 8.0$  Hz, 1H), 7.41 - 7.34 (m, 4H), 7.32 - 7.26 (m, 3H), 7.22 - 7.16 (m, 5H), 3.63 (s, 3H);  $^{13}\text{C}$  NMR (100 MHz,  $\text{CDCl}_3$ )  $\delta$  138.0, 137.4, 133.9, 131.7, 131.3, 131.2, 131.1, 128.6, 128.5, 128.3, 126.8, 122.4, 120.5, 119.4, 113.9, 109.8, 31.0 ppm;  $\nu_{\text{max}}(\text{KBr})/\text{cm}^{-1}$  3048, 2936, 1628, 1486, 1419, 1260, 748; MS (EI)  $m/z$  141, 204, 239, 267, 281, 317; HRMS-ESI ( $m/z$ ): calcd for  $\text{C}_{21}\text{H}_{17}\text{ClN}$ ,  $[\text{M}+\text{H}]^+$ : 318.1044, found 318.1045.

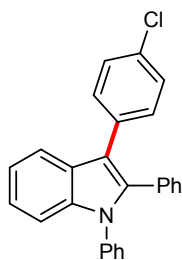

3-(4-Chlorophenyl)-1,2-diphenyl-1H-indole (**5s**): Yield: 82% (62.2 mg) as a white solid; mp = 165.8 - 167.6 °C; <sup>1</sup>H NMR (400 MHz, CDCl<sub>3</sub>) δ 7.78 - 7.71 (m, 1H), 7.39 - 7.27 (m, 8H), 7.24 - 7.19 (m, 4H), 7.18 - 7.12 (m, 3H), 7.09 - 7.03 (m, 2H); <sup>13</sup>C NMR (100 MHz, CDCl<sub>3</sub>) δ 138.0, 137.9, 137.3, 133.5, 131.7, 131.4, 131.3, 131.1, 129.1, 128.8, 128.5, 128.3, 128.0, 127.6, 127.3, 122.9, 121.1, 119.3, 115.5, 110.8 ppm; ν<sub>max</sub>(KBr)/cm<sup>-1</sup> 3054, 2922, 1596, 1495, 1453, 743; MS (EI) m/z 77, 113, 164, 239, 267, 343, 379; HRMS-ESI (m/z): calcd for C<sub>26</sub>H<sub>18</sub>ClNNa, [M+Na]<sup>+</sup>: 402.1020, found 402.1020.

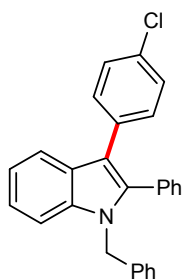

1-Benzyl-3-(4-chlorophenyl)-2-phenyl-1H-indole (**5t**)<sup>[8]</sup>: Yield: 87% (68.4 mg) as a white solid; mp = 129.0 - 130.5 °C; <sup>1</sup>H NMR (400 MHz, CDCl<sub>3</sub>) δ 7.78 - 7.74 (m, 1H), 7.31 - 7.21 (m, 10H), 7.19 - 7.14 (m, 5H), 7.01 - 6.94 (m, 2H), 5.26 (s, 2H); <sup>13</sup>C NMR (100 MHz, CDCl<sub>3</sub>) δ 138.2, 138.0, 137.1, 133.8, 131.6, 131.4, 131.1, 131.1, 128.8, 128.6, 128.5, 128.4, 127.3, 127.2, 126.2, 122.7, 120.7, 119.5, 114.6, 110.7, 47.7 ppm; ν<sub>max</sub>(KBr)/cm<sup>-1</sup> 3056, 2922, 1604, 1546, 1445, 740; MS (EI) m/z 91, 163, 239, 267, 302, 393; HRMS-ESI (m/z): calcd for C<sub>27</sub>H<sub>20</sub>ClNNa, [M+Na]<sup>+</sup>: 416.1176, found 416.1172.



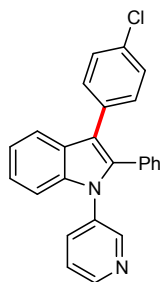

3-(4-Chlorophenyl)-2-phenyl-1-(pyridin-3-yl)-1H-indole (**5u**): Yield: 56% (68.4 mg) as a yellow solid; mp = 170.4 - 171.7 °C; <sup>1</sup>H NMR (400 MHz, CDCl<sub>3</sub>) δ 8.58 (s, 2H), 7.76 (dd, *J* = 5.6, 2.8 Hz, 1H), 7.49 (dd, *J* = 6.6, 4.0 Hz, 1H), 7.36 - 7.26 (m, 8H), 7.23 - 7.15 (m, 3H), 7.06 (dd, *J* = 8.0, 1.6 Hz, 2H); <sup>13</sup>C NMR (100 MHz, CDCl<sub>3</sub>) δ 149.2, 148.2, 137.8, 137.1, 135.4, 132.9, 132.1, 131.3, 131.2, 130.6, 128.6, 128.4, 128.0, 127.6, 123.7, 123.4, 121.6, 119.6, 116.5, 110.3 ppm; ν<sub>max</sub>(KBr)/cm<sup>-1</sup> 3441, 3053, 1637, 1454, 1426, 740; MS (EI) *m/z* 105, 171, 241, 267, 344, 380; HRMS-ESI (*m/z*): calcd for C<sub>25</sub>H<sub>18</sub>ClN<sub>2</sub>, [M+H]<sup>+</sup>: 381.1153, found 381.1158.

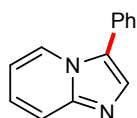

3-Phenylimidazo[1,2-a]pyridine (**12a**)<sup>[9]</sup>: Yield: 83% (32.2 mg) as a white solid; mp = 135.6 - 136.8 °C; <sup>1</sup>H NMR (400 MHz, CDCl<sub>3</sub>) δ 8.07 (d, *J* = 6.8 Hz, 1H), 8.01 - 7.94 (m, 2H), 7.82 (s, 1H), 7.68 - 7.60 (m, 1H), 7.45 (dd, *J* = 10.4, 4.8 Hz, 2H), 7.34 (ddd, *J* = 7.6, 4.0, 1.2 Hz, 1H), 7.15 (ddd, *J* = 9.0, 6.8, 1.2 Hz, 1H), 6.74 (td, *J* = 6.8, 1.2 Hz, 1H); <sup>13</sup>C NMR (100 MHz, CDCl<sub>3</sub>) δ 145.8, 145.7, 133.7, 128.7, 127.9, 126.1, 125.6, 124.6, 117.5, 112.4, 108.1 ppm; ν<sub>max</sub>(KBr)/cm<sup>-1</sup> 3048, 1636, 1523, 1458, 1407, 746; MS (EI) *m/z* 78, 96, 139, 167, 194.

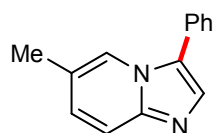

6-Methyl-3-phenylimidazo[1,2-a]pyridine (**12b**)<sup>[9]</sup> : Yield: 80% (33.3 mg) as a white solid; mp = 172.5 - 174.2 °C; <sup>1</sup>H NMR (400 MHz, CDCl<sub>3</sub>) δ 7.96 (d, *J* = 7.2 Hz, 2H), 7.89 (s, 1H), 7.77 (s, 1H), 7.55 (d, *J* = 9.2 Hz, 1H), 7.44 (t, *J* = 7.6 Hz, 2H), 7.33 (t, *J* = 7.2 Hz, 1H), 7.02 (dd, *J* = 9.2, 1.4 Hz, 1H), 2.32 (s, 3H); <sup>13</sup>C NMR (100 MHz, CDCl<sub>3</sub>) δ 145.5, 144.8, 133.9, 128.7, 127.8, 127.8, 125.9, 123.3, 122.0, 116.8, 107.8, 18.1 ppm; *v*<sub>max</sub>(KBr)/cm<sup>-1</sup> 3036, 2928, 1656, 1549, 1473, 1411, 1206, 750; MS (EI) *m/z* 78, 96, 167, 194, 208.

#### References:

- [1] A. Arcadi, S. Cacchi, G. Fabrizi, A. Goggiamani, A. Iazzetti and F. Marinelli, *Org. Biomol. Chem.*, 2013, **11**, 545.
- [2] R. Bernini, S. Cacchi, G. Fabrizi, G. Forte, F. Petrucci, A. Prastaro, S. Niembro, A. Shafir and A. Vallribera, *Green Chem.*, 2010, **12**, 150.
- [3] K. Sun, S. Liu, P. M. Bec and T. G. Driver, *Angew. Chem. Int. Ed.*, 2011, **50**, 1702.
- [4] H. Yan, H. Wang, X. Li, X. Xin, C. Wang and B. Wan, *Angew. Chem. Int. Ed.*, 2015, **54**, 10613.
- [5] T. Tsuchimoto, M. Iwabuchi, Y. Nagase, K. Oki and H. Takahashi, *Angew. Chem. Int. Ed.*, 2011, **50**, 1375.
- [6] A. Sagadevan, A. Ragupathi and K. C. Hwang, *Angew. Chem. Int. Ed.*, 2015, **54**, 13896.
- [7] D. Zhao, Z. Shi and F. Glorius, *Angew. Chem. Int. Ed.*, 2013, **52**, 12426.
- [8] X. Dou, W. Yao, S. Wen and Y. Lu, *Chem. Commun.*, 2014, **50**, 9469.
- [9] C. He, J. Hao, H. Xu, Y. Mo, H. Liu, J. Han and A. Lei, *Chem. Commun.*, 2012, **48**, 11073.

## X-ray Crystallographic Analysis for Product 5o

The CCDC number of compound **5o** is 1524656.

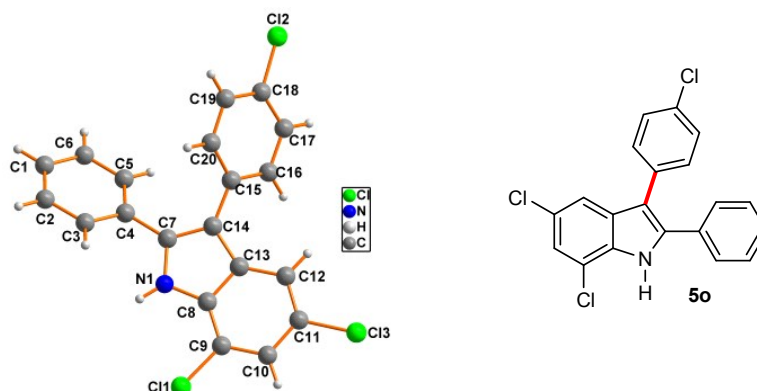

Crystal Data and Structure Refinement for Product **5o**

|                                   |                                                   |
|-----------------------------------|---------------------------------------------------|
| Empirical formula                 | C <sub>20</sub> H <sub>12</sub> Cl <sub>3</sub> N |
| Formula weight                    | 372.66                                            |
| Temperature                       | 150(10) K                                         |
| Wavelength                        | 1.54184 Å                                         |
| Crystal system                    | monoclinic                                        |
| Space group                       | P 1 21/c 1                                        |
| Unit cell dimensions              | a= 11.93574(15) Å, α= 90.00°                      |
|                                   | b=7.18231(8) Å, β= 94.7142(11)°                   |
|                                   | c= 19.3705(2) Å, γ= 90.00°                        |
| Density (calculated)              | 1.496                                             |
| Absorption coefficient            | 5.003                                             |
| F(000)                            | 760.0                                             |
| Crystal size                      | 0.2×0.1×0.1                                       |
| Theta range for data collection   | 4.20 to 74.00                                     |
| Index ranges                      | -14≤h≤14, -4≤k≤8, -19≤l≤24                        |
| Reflections collected             | 3260                                              |
| Independent reflections           | 3084                                              |
| Completeness to theta = 25.00°    | 99.94%                                            |
| Absorption correction             | multi-scan                                        |
| Refinement method                 | Full-matrix least-squares on F <sup>2</sup>       |
| Data/restraints/parameters        | 3260/0/217                                        |
| Goodness-of-fit on F <sup>2</sup> | 1.057                                             |
| Final R indices [I>2σ(I)]         | R1 = 0.0398, wR2 = 0.1081                         |
| R indices (all data)              | R1 = 0.0414, wR2 = 0.1101                         |

### <sup>1</sup>H and <sup>13</sup>C NMR spectra of compounds 3

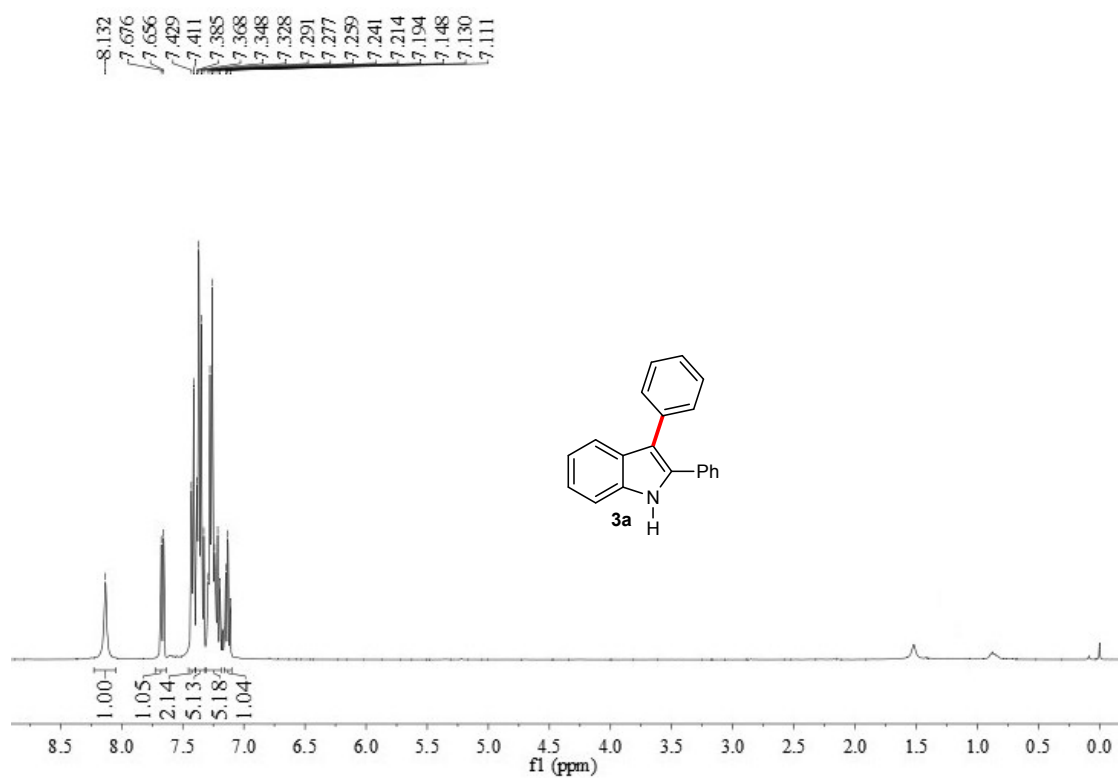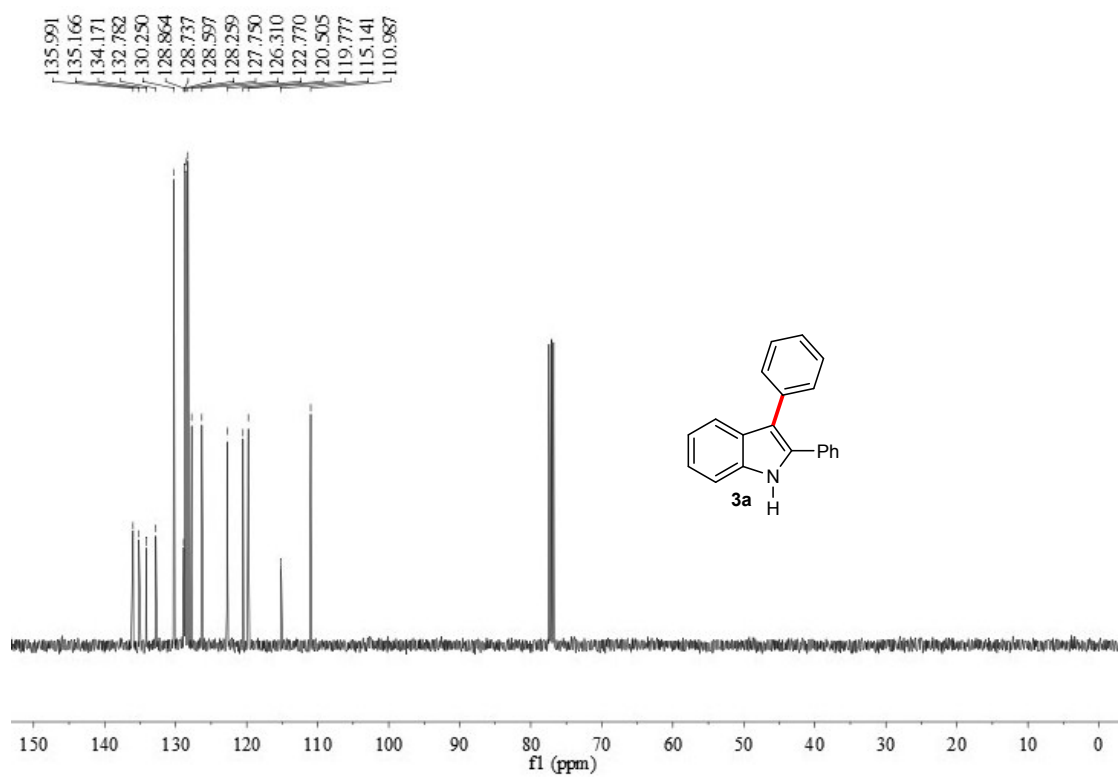

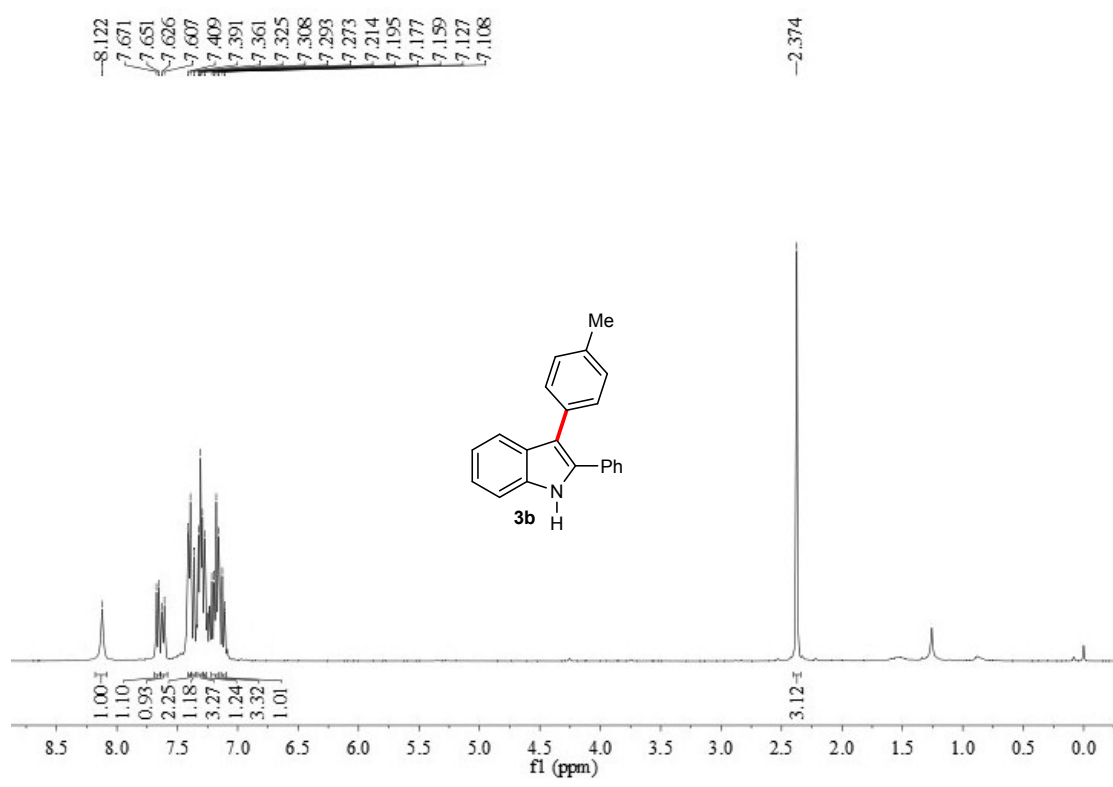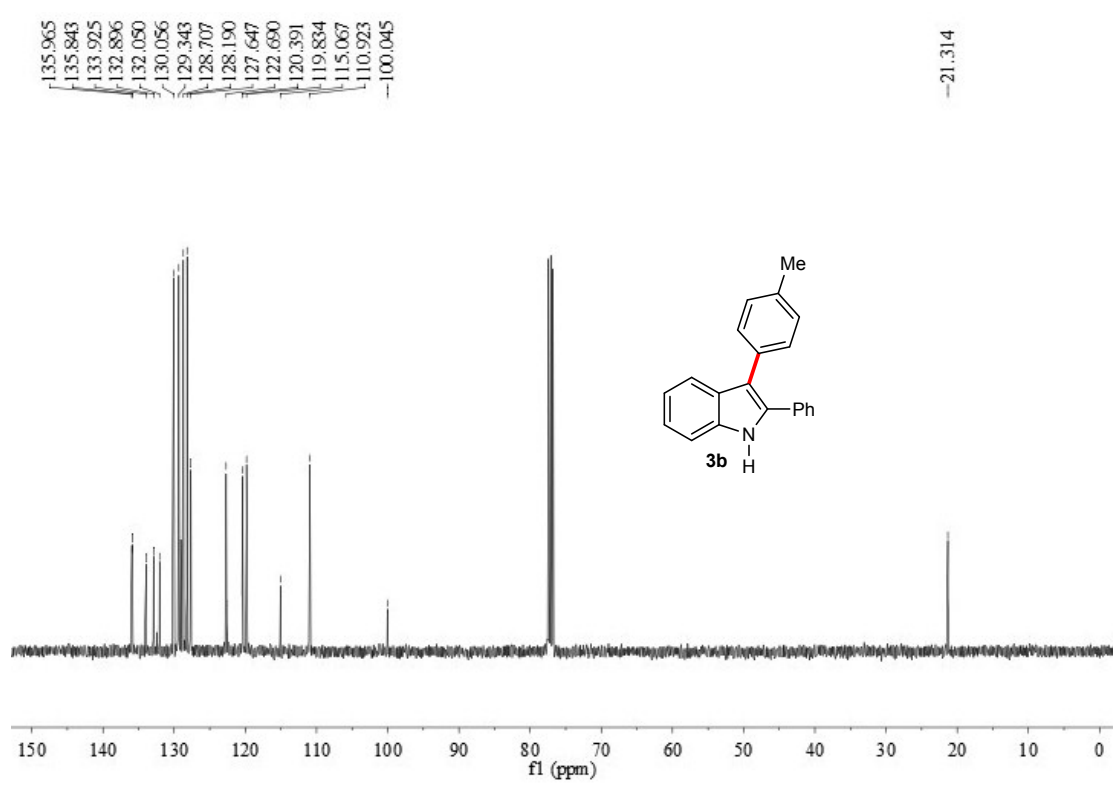

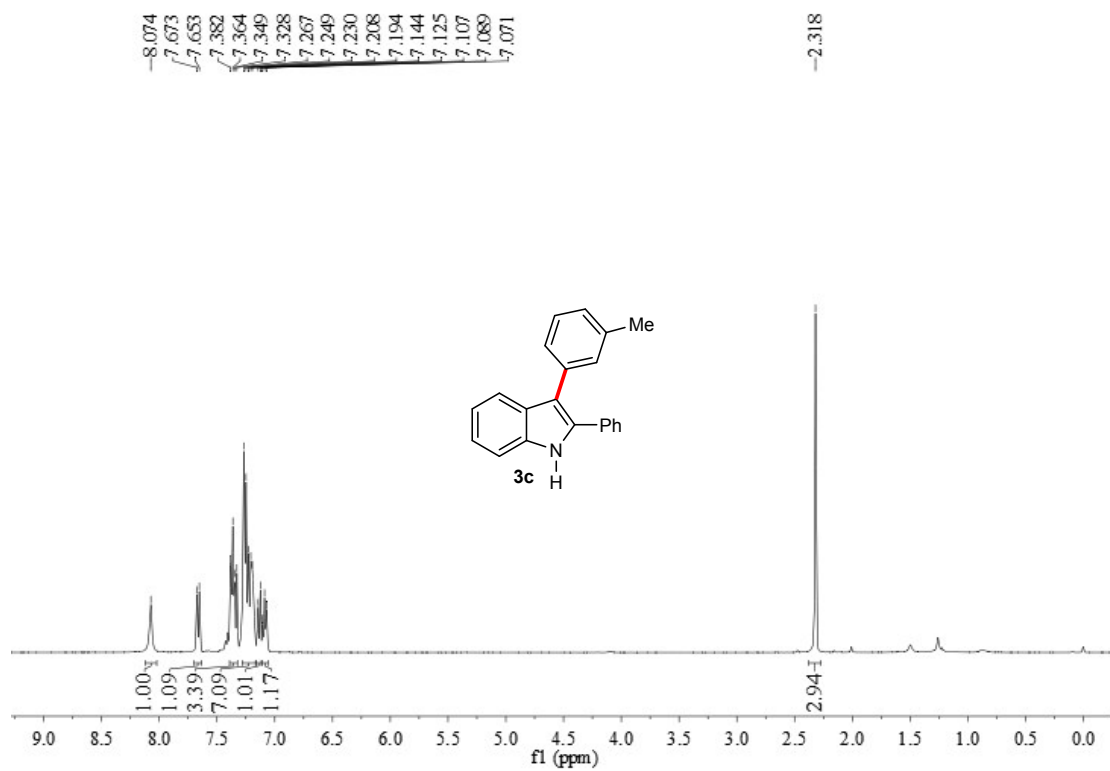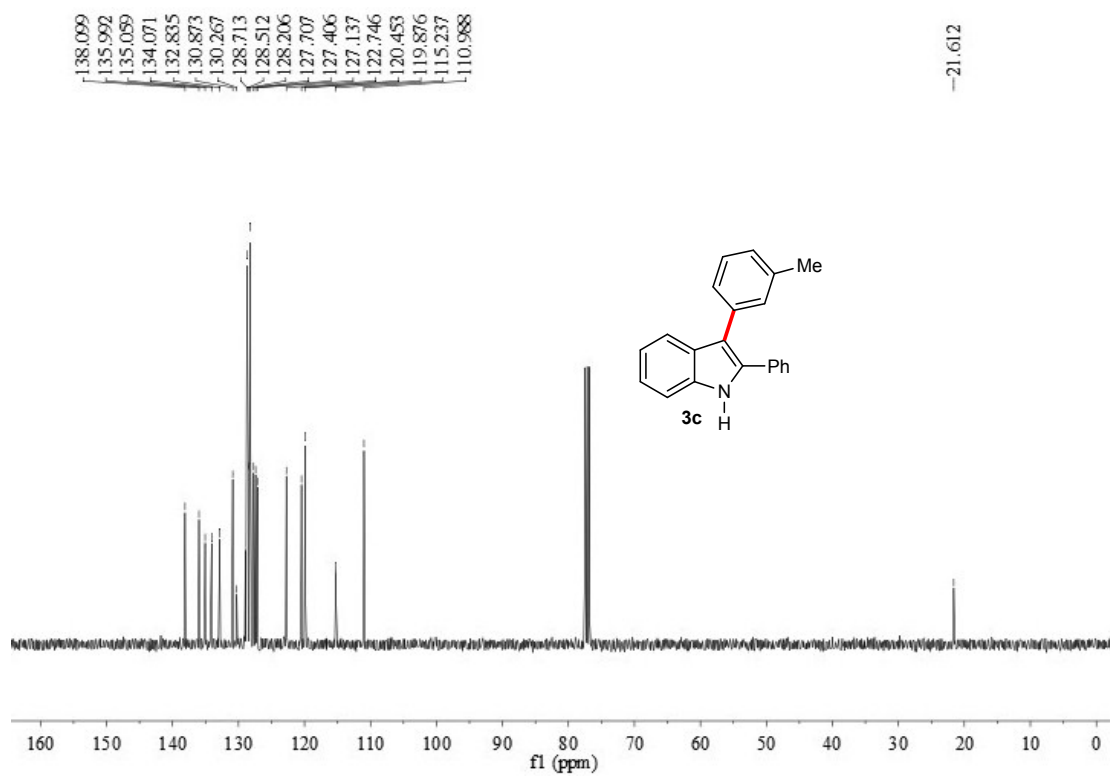

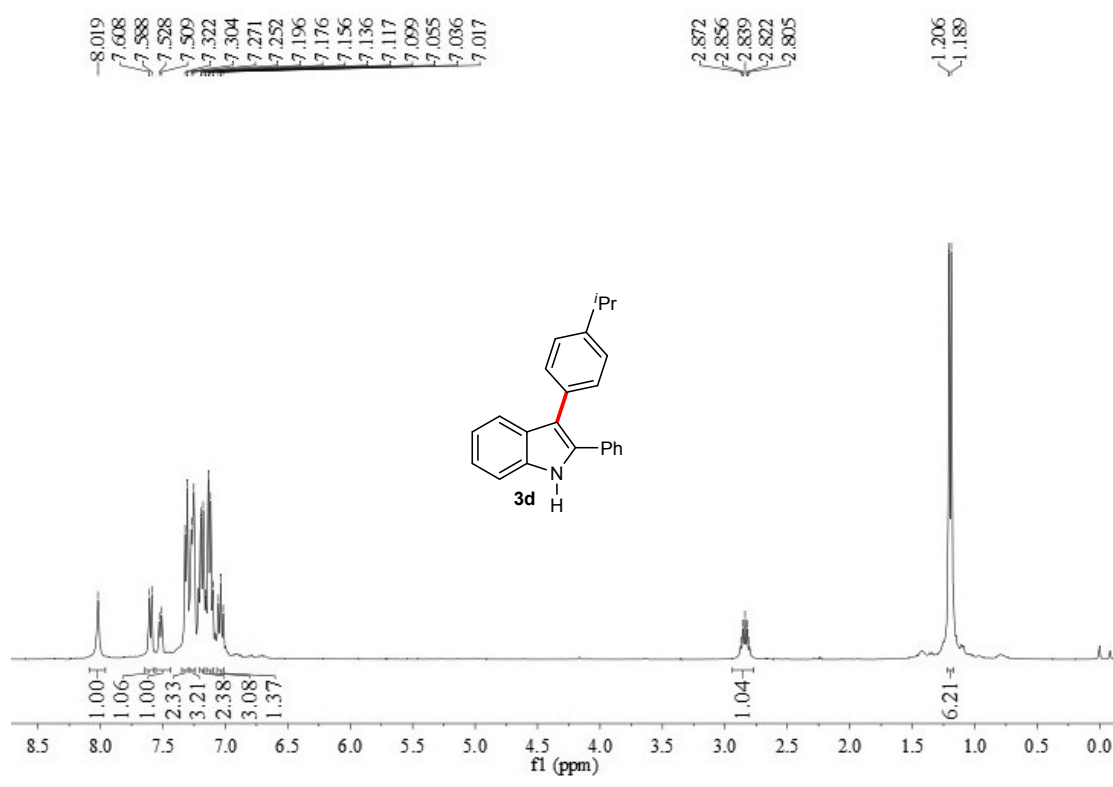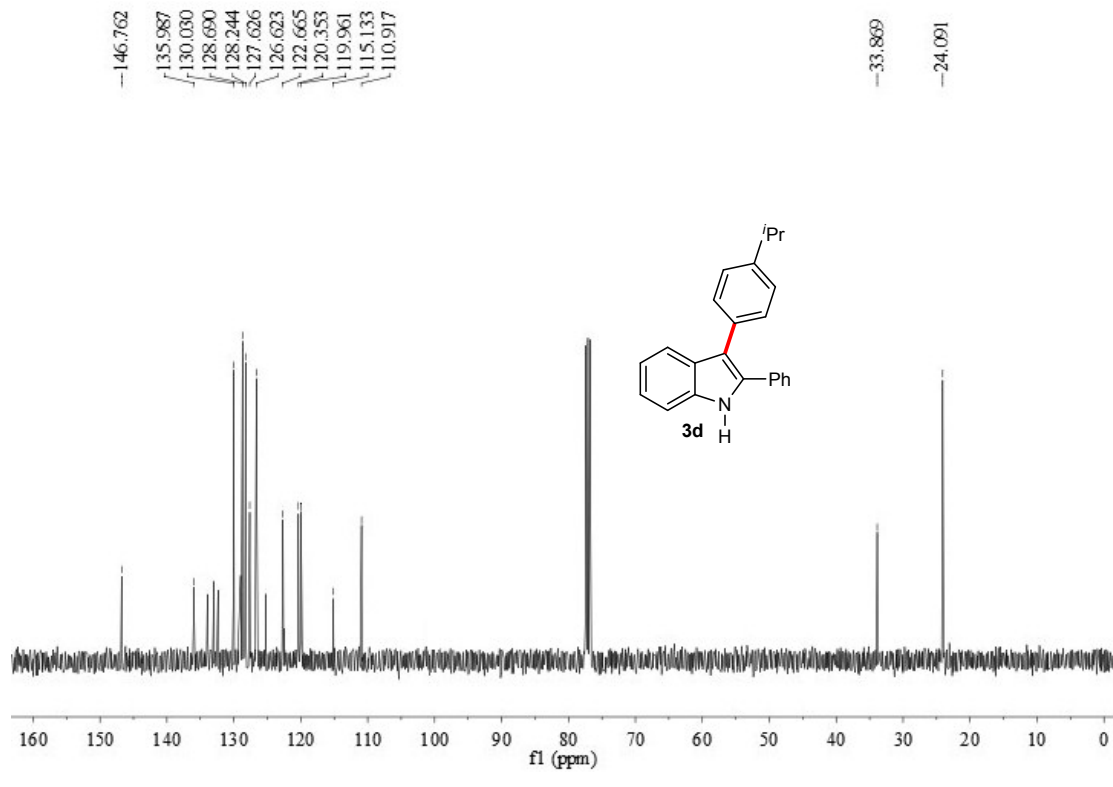

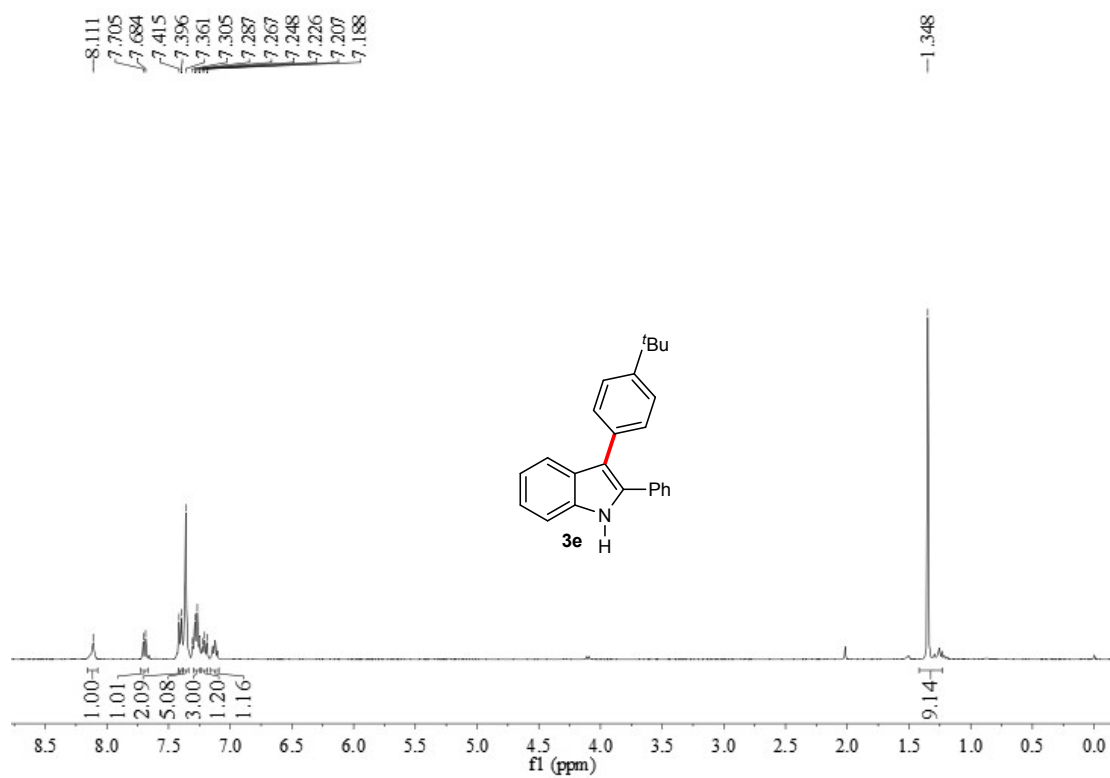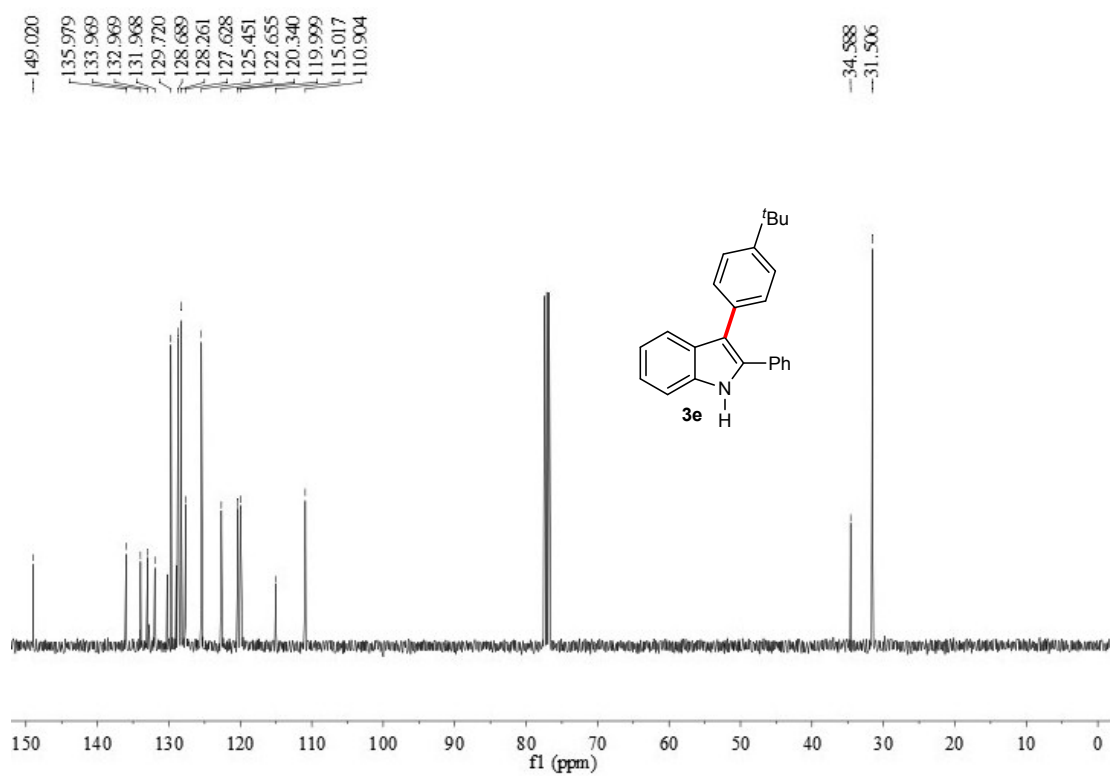



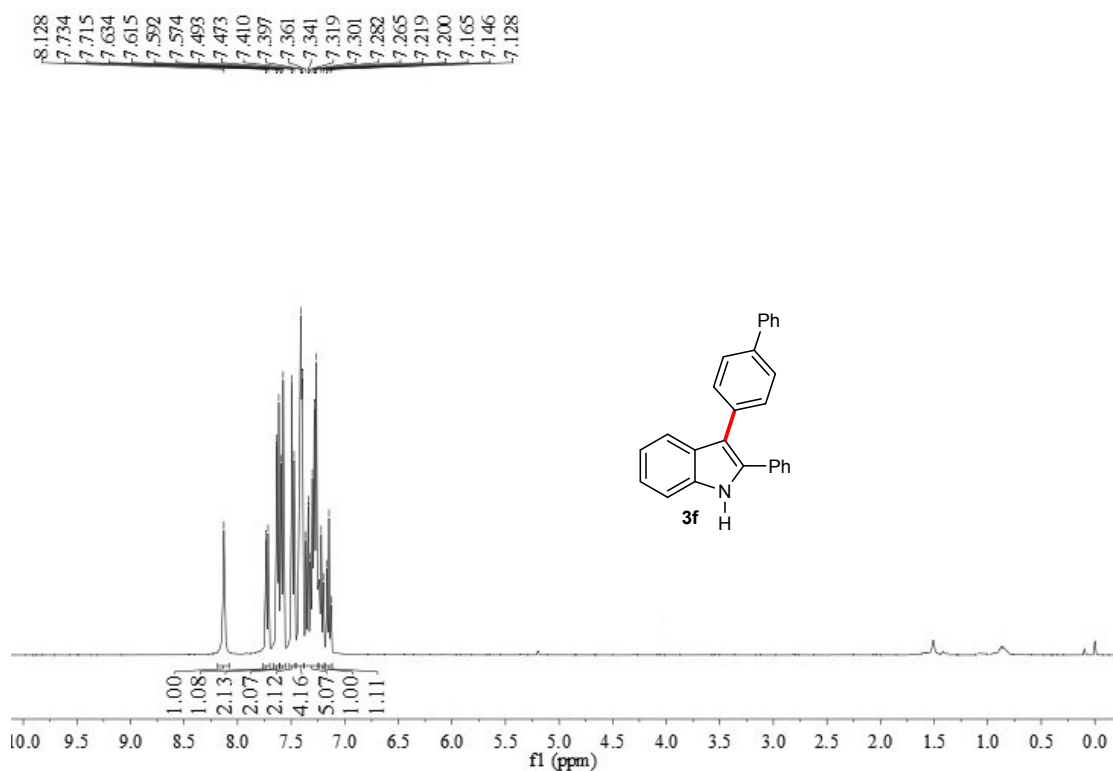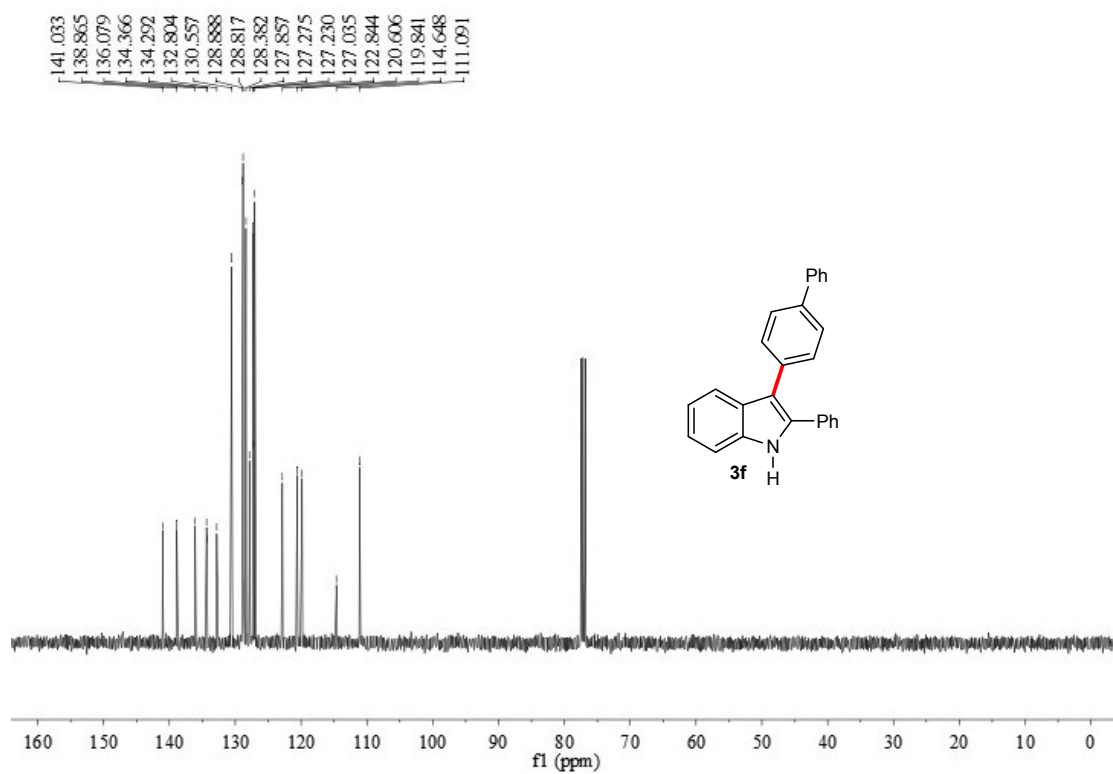

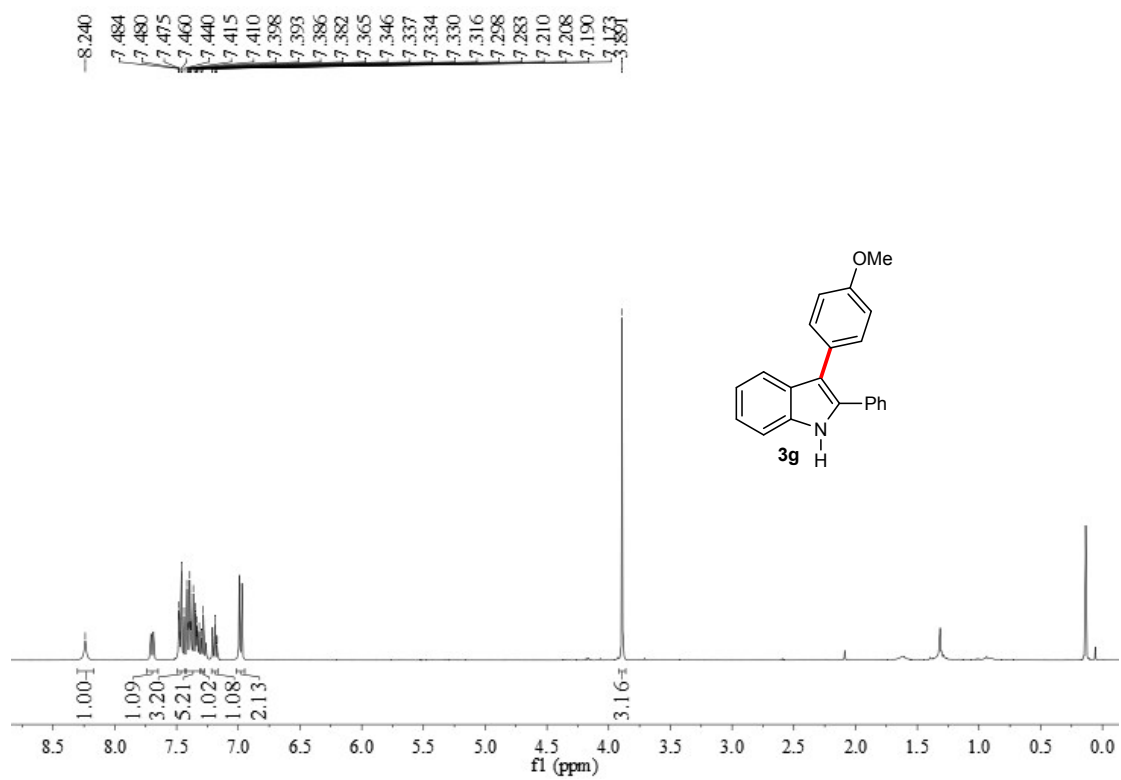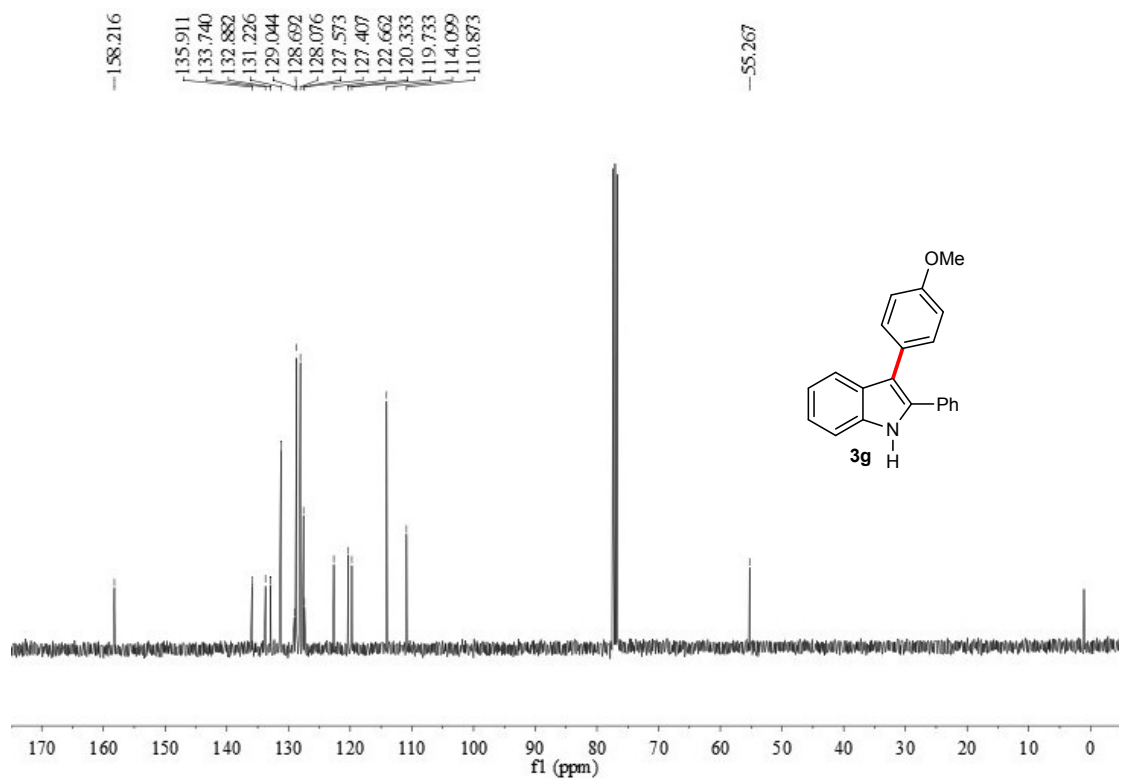

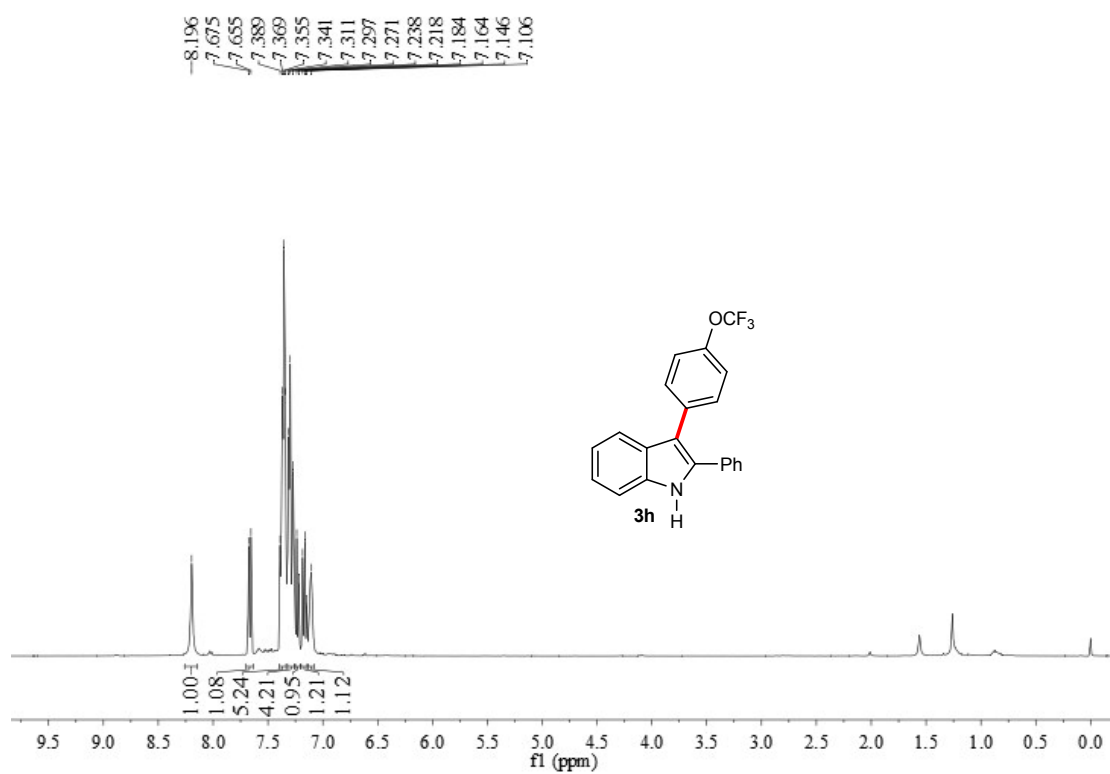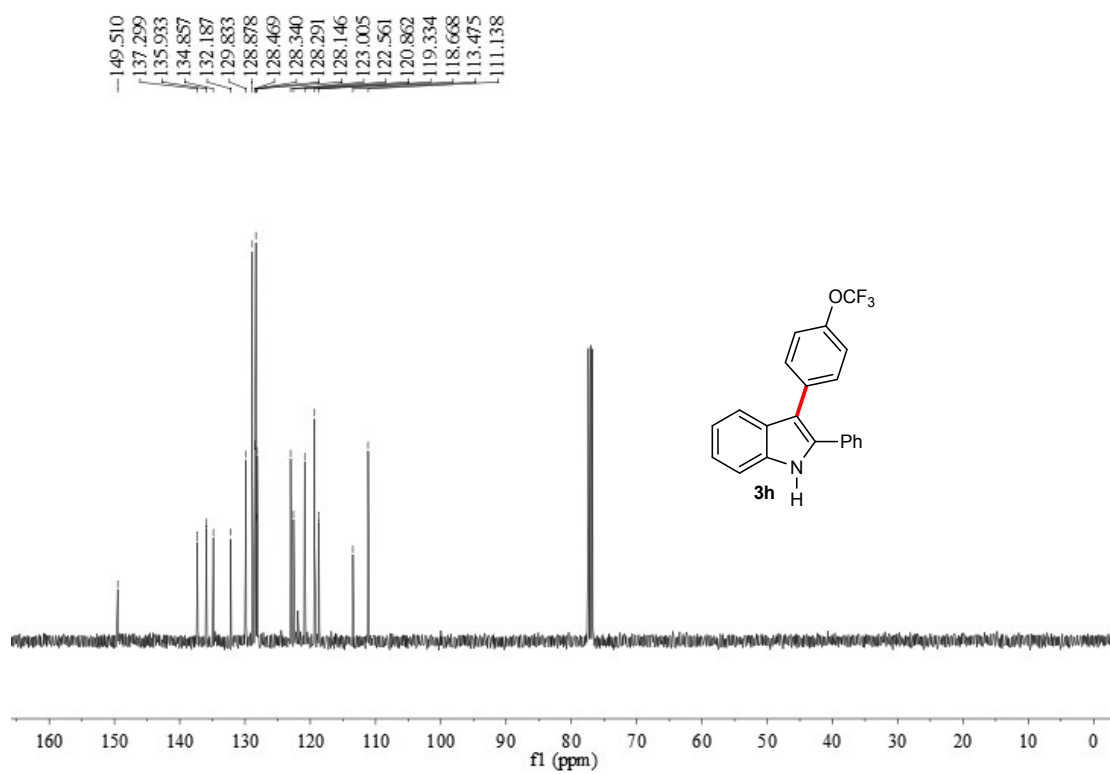

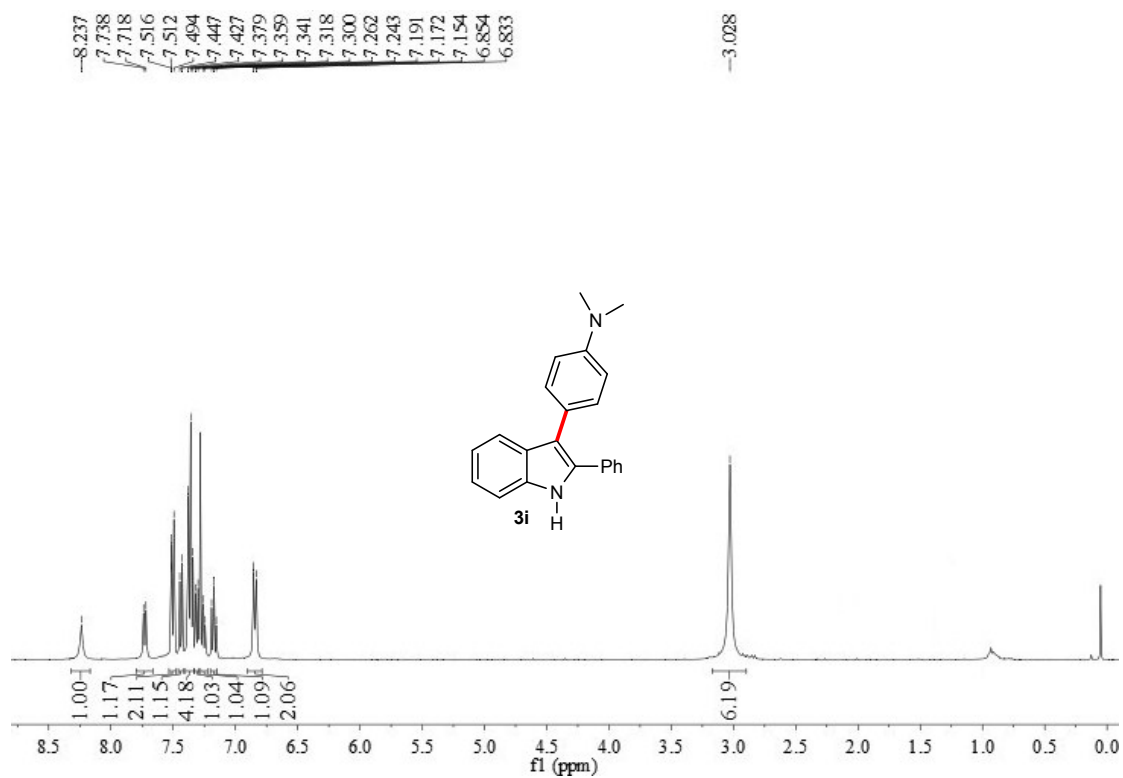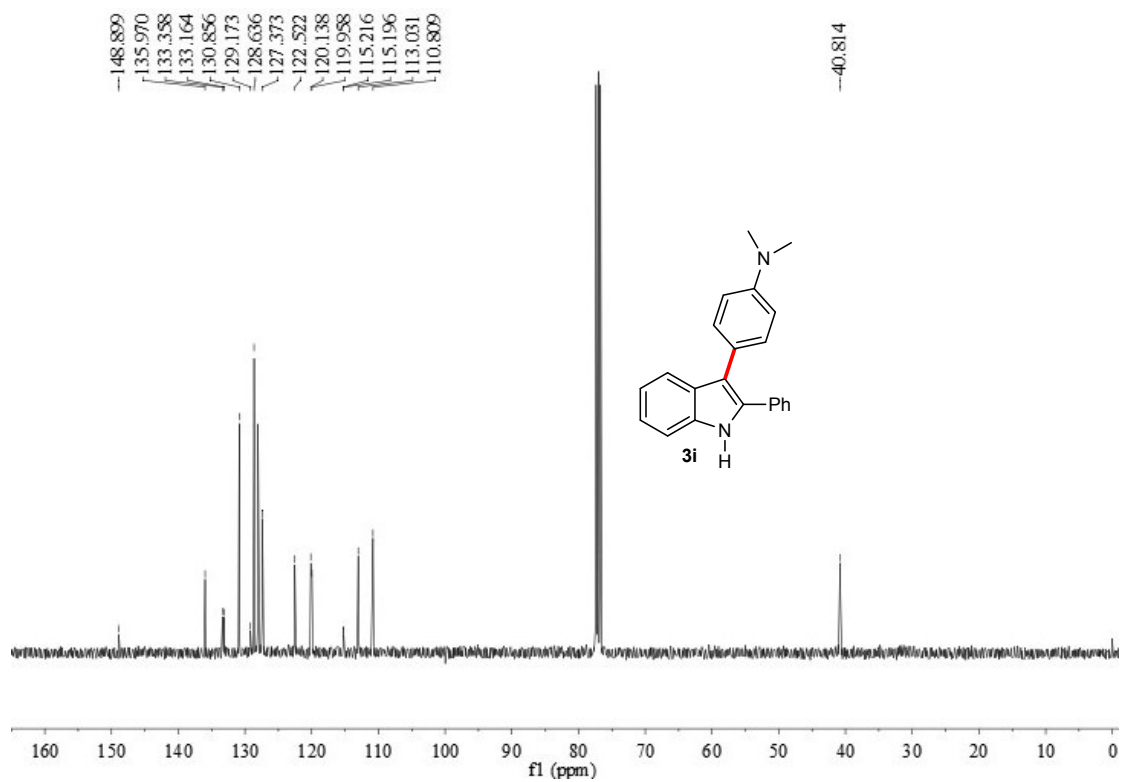



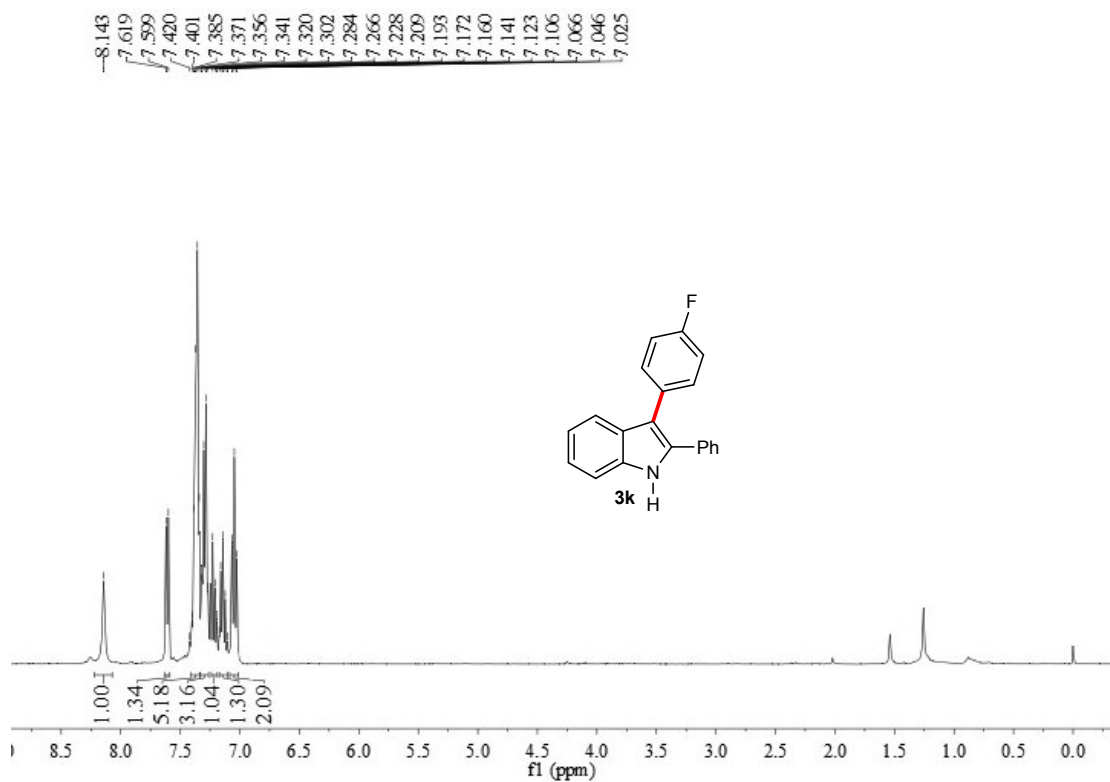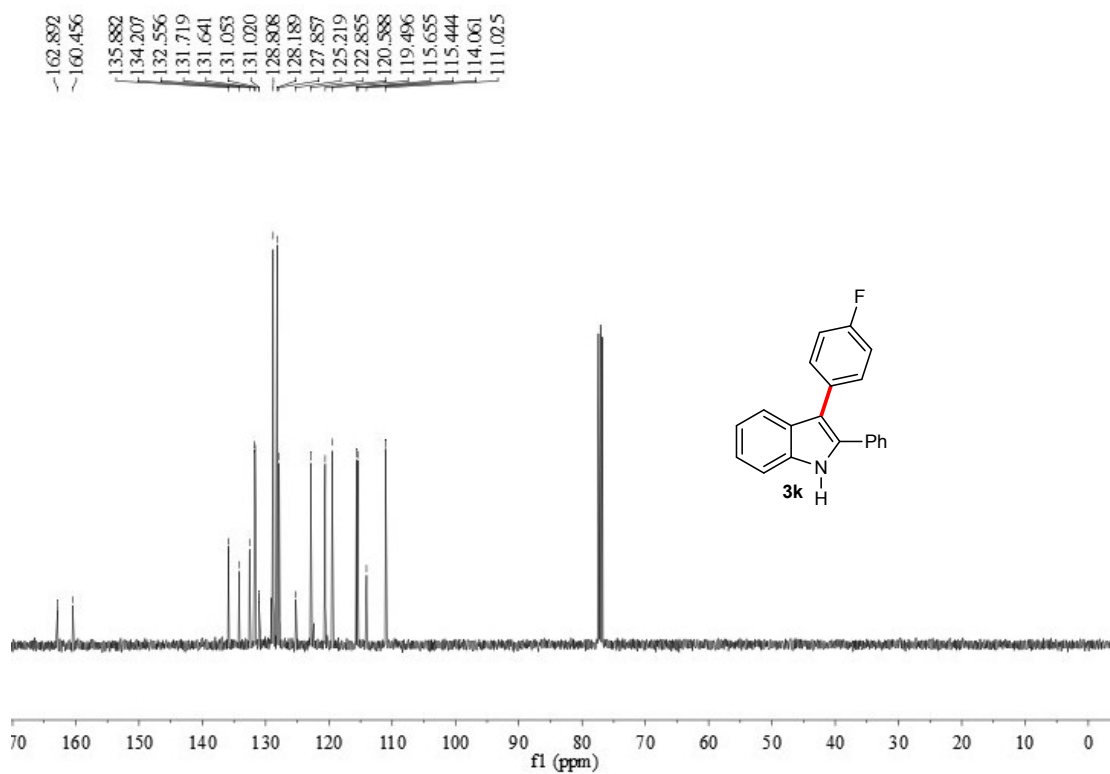

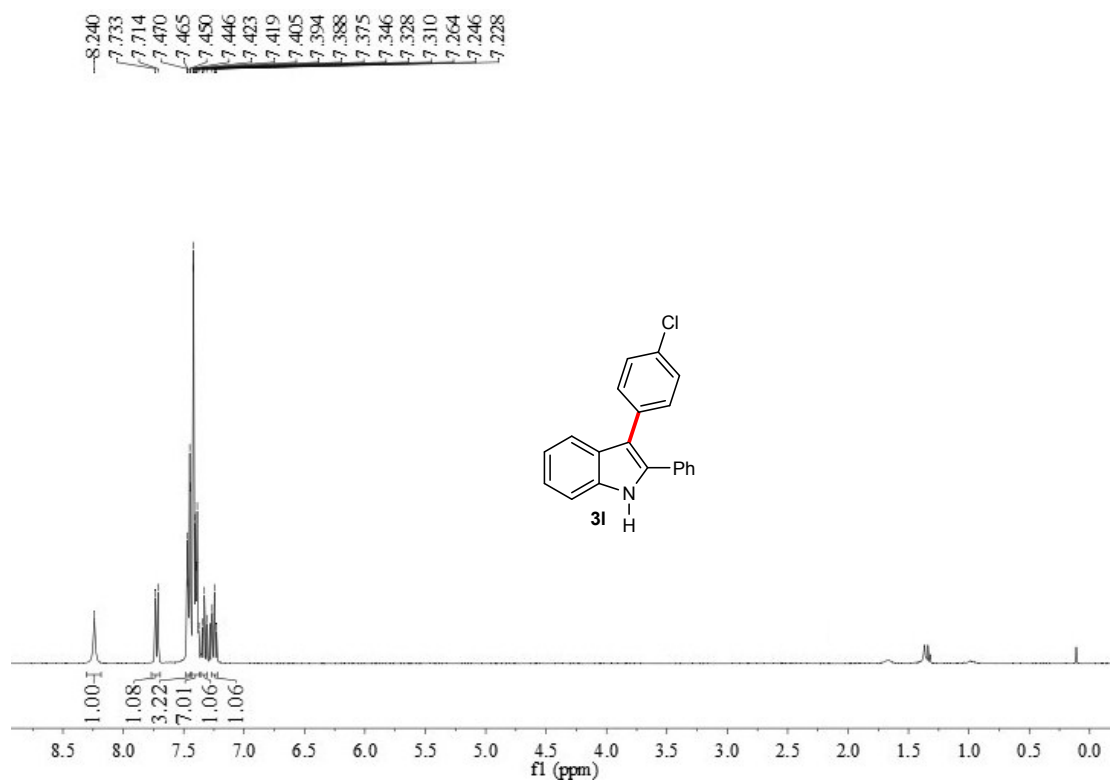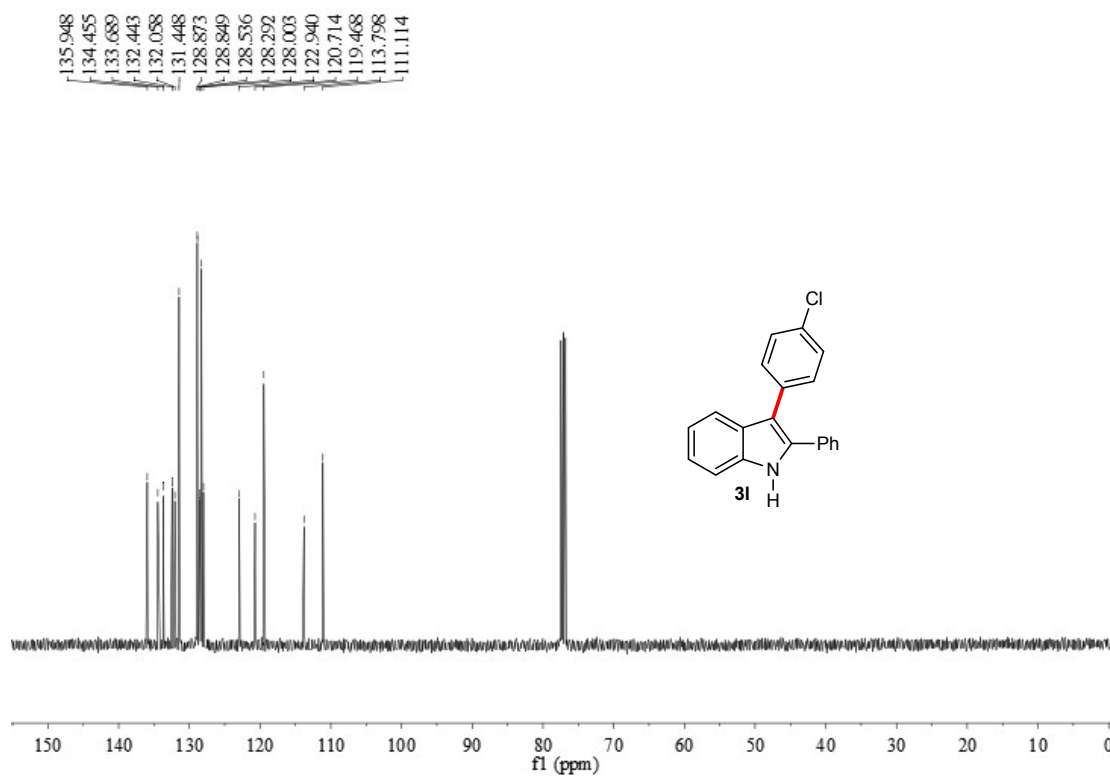

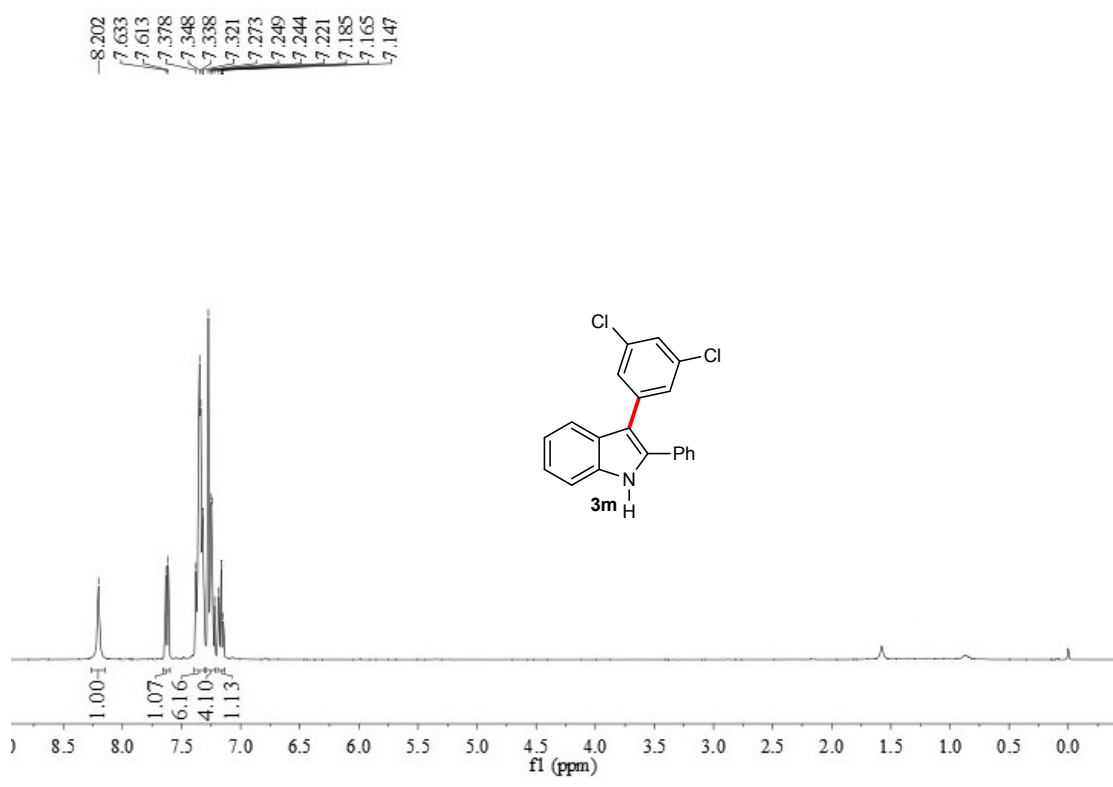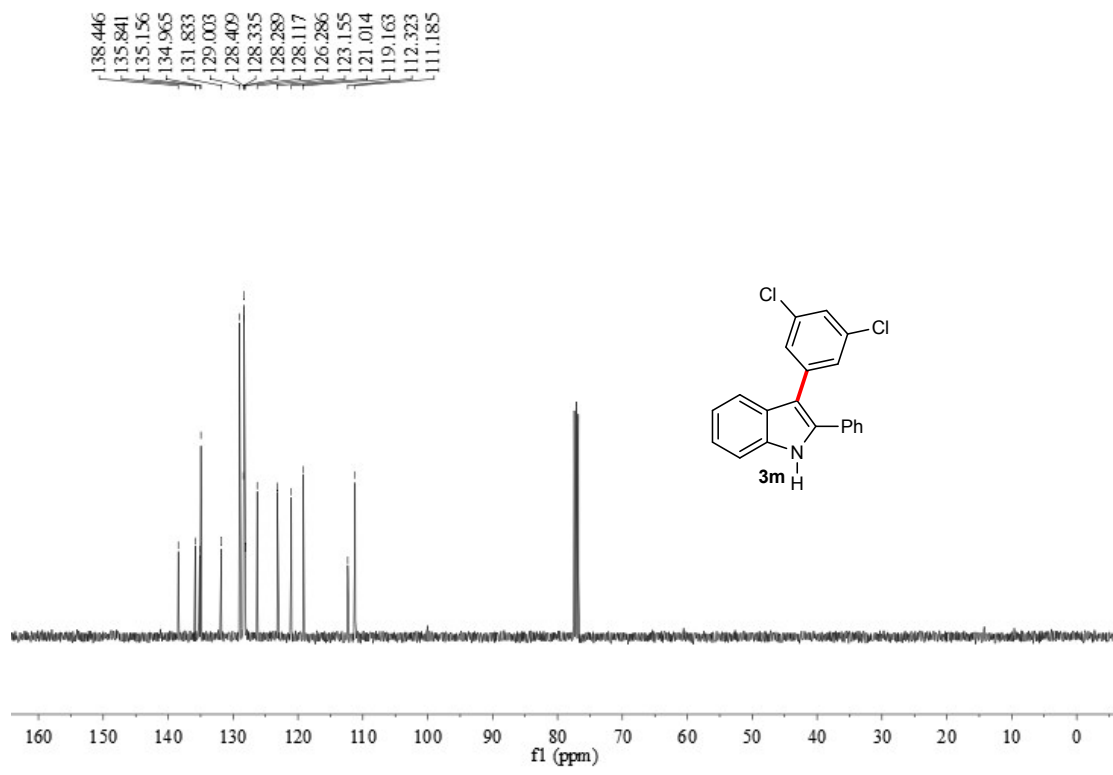



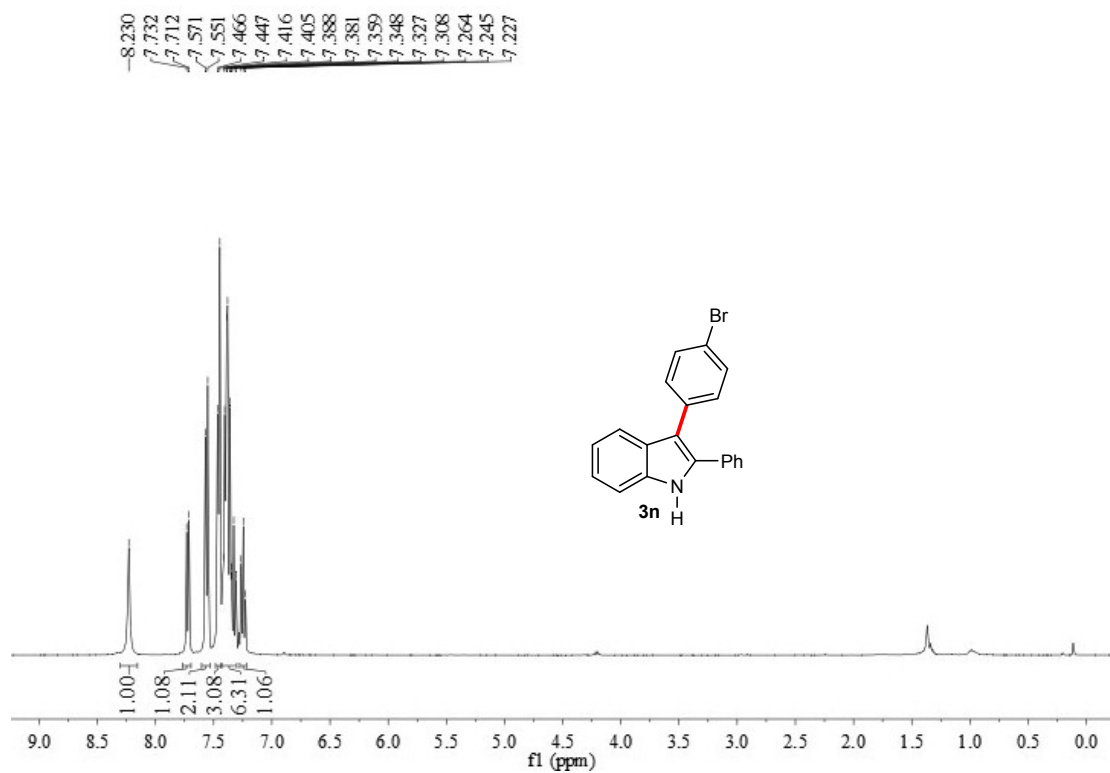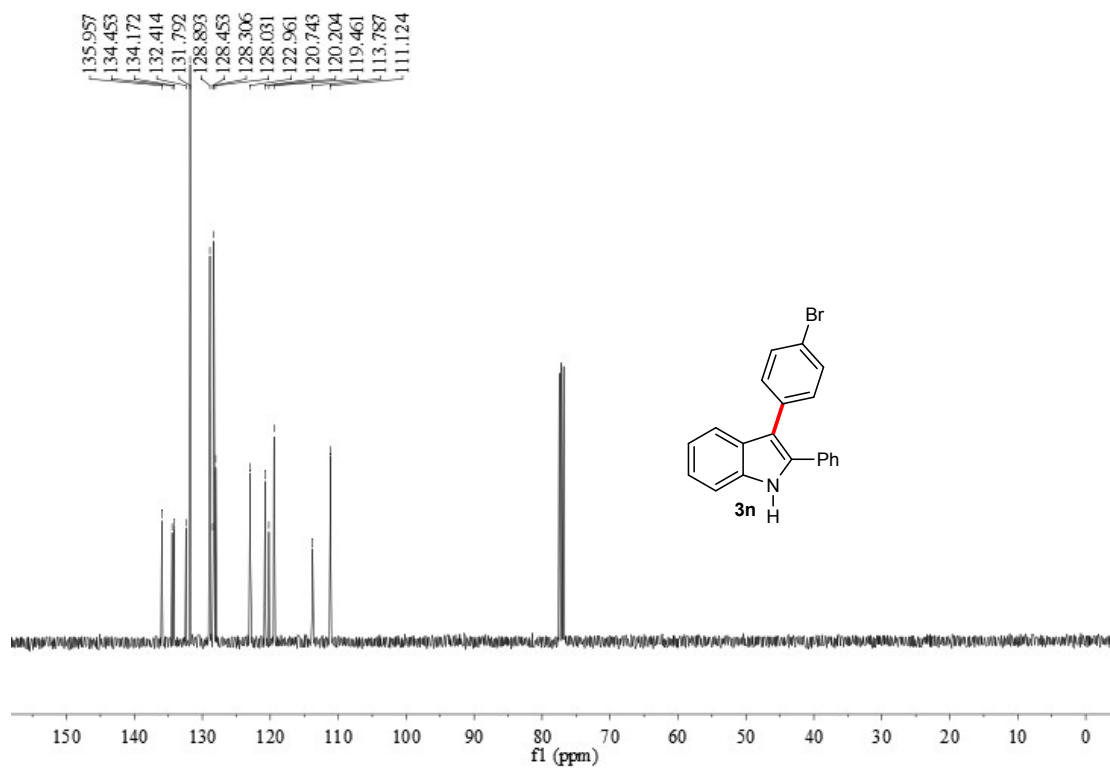

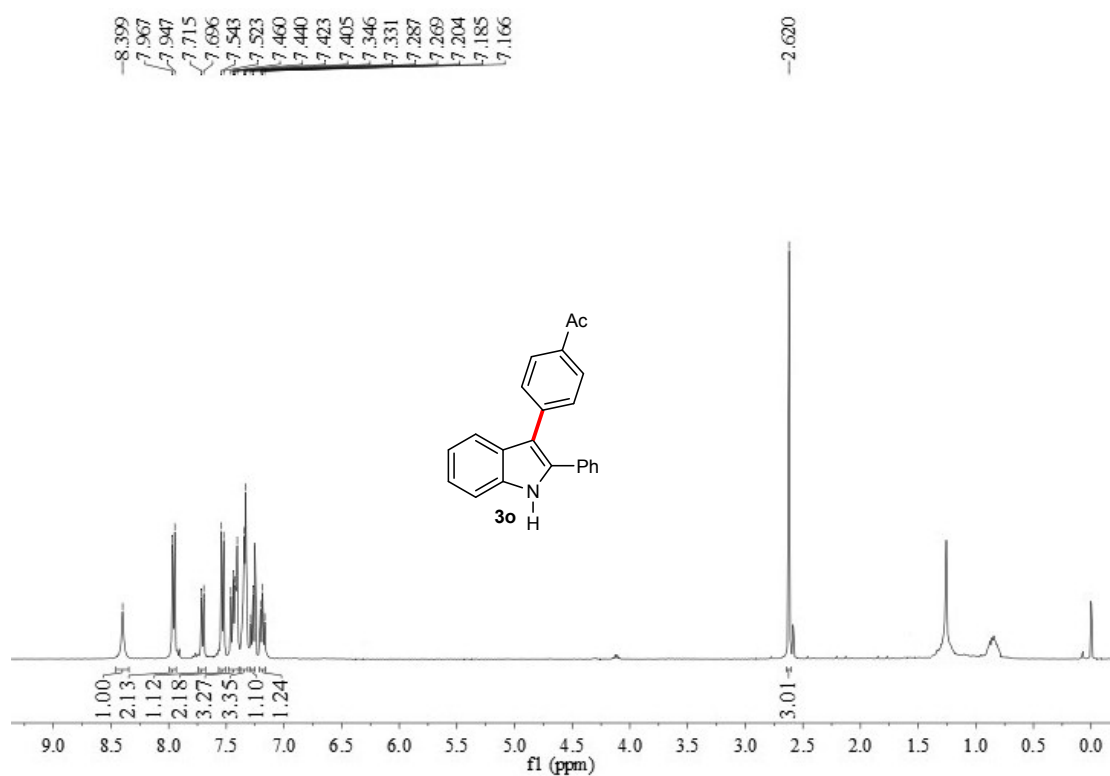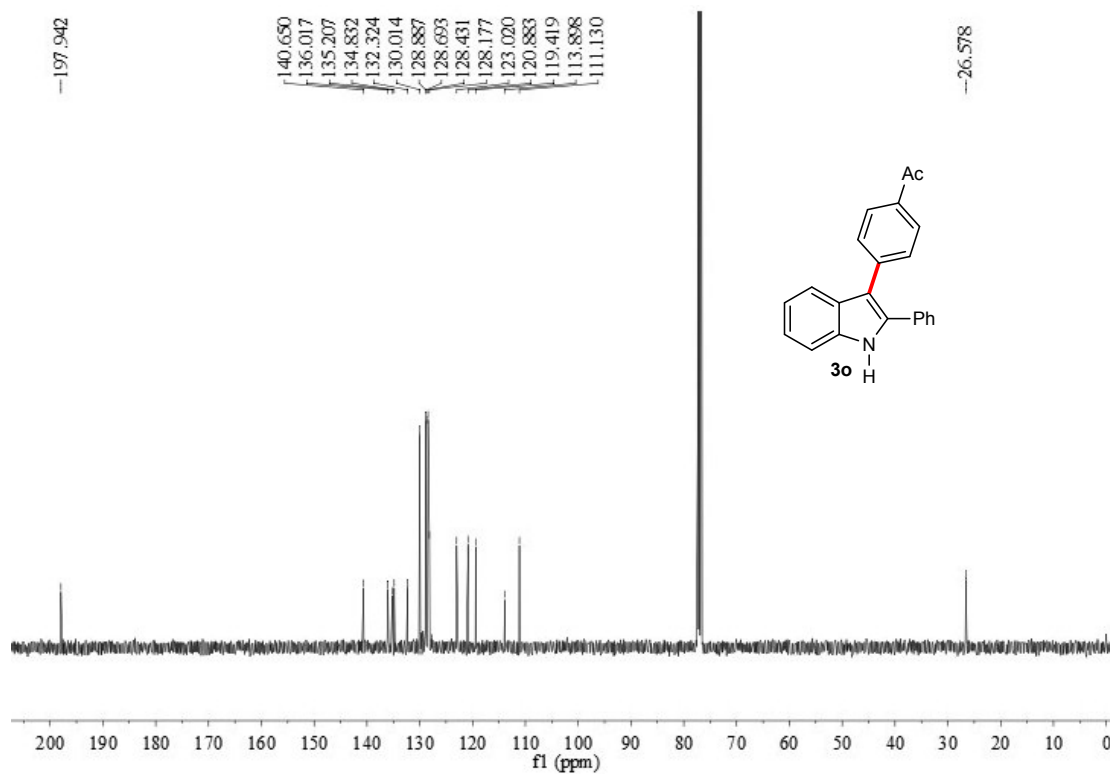

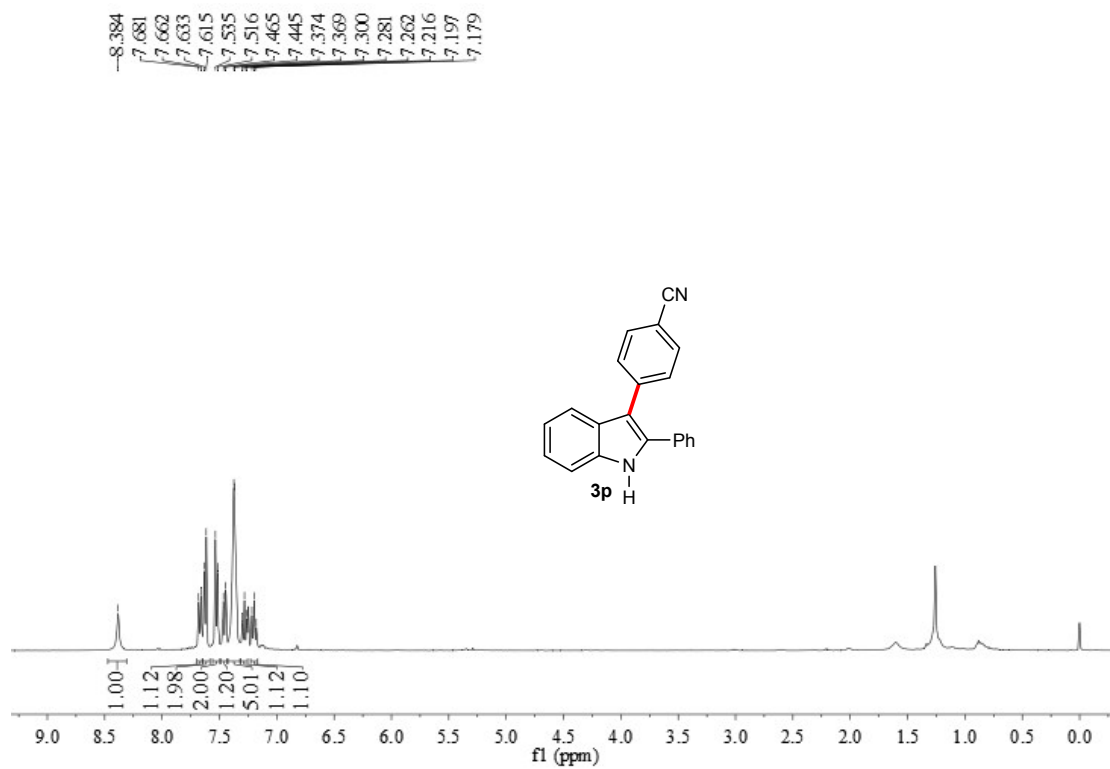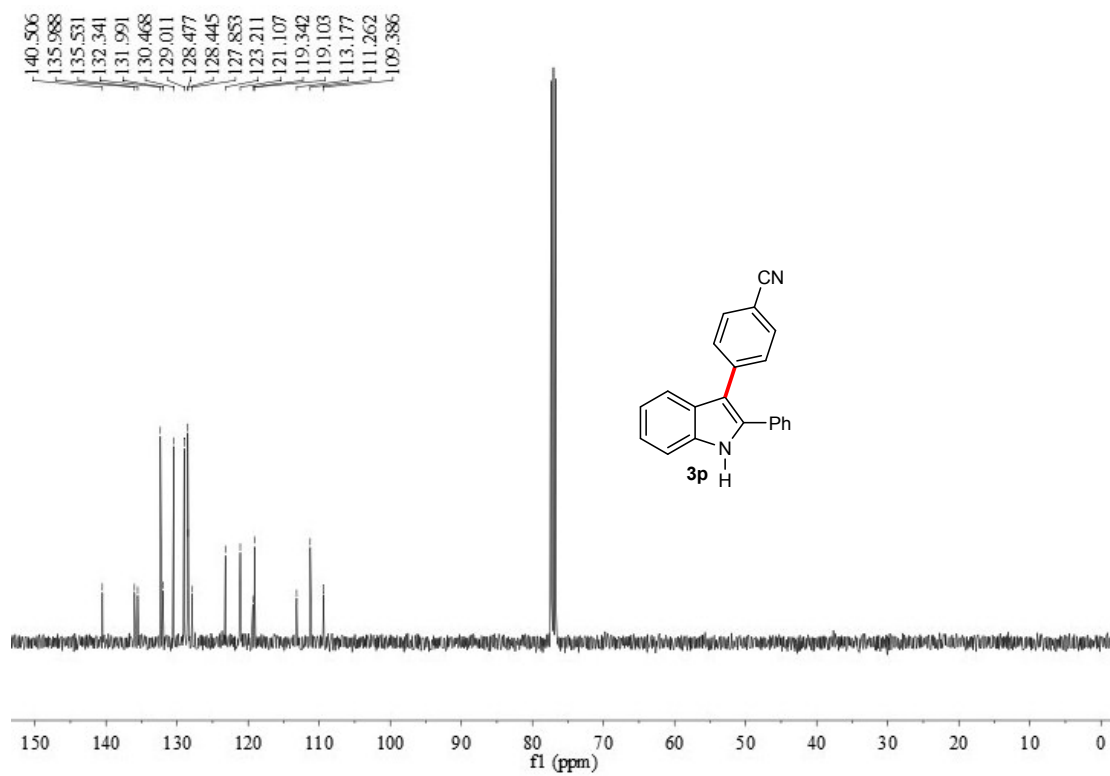

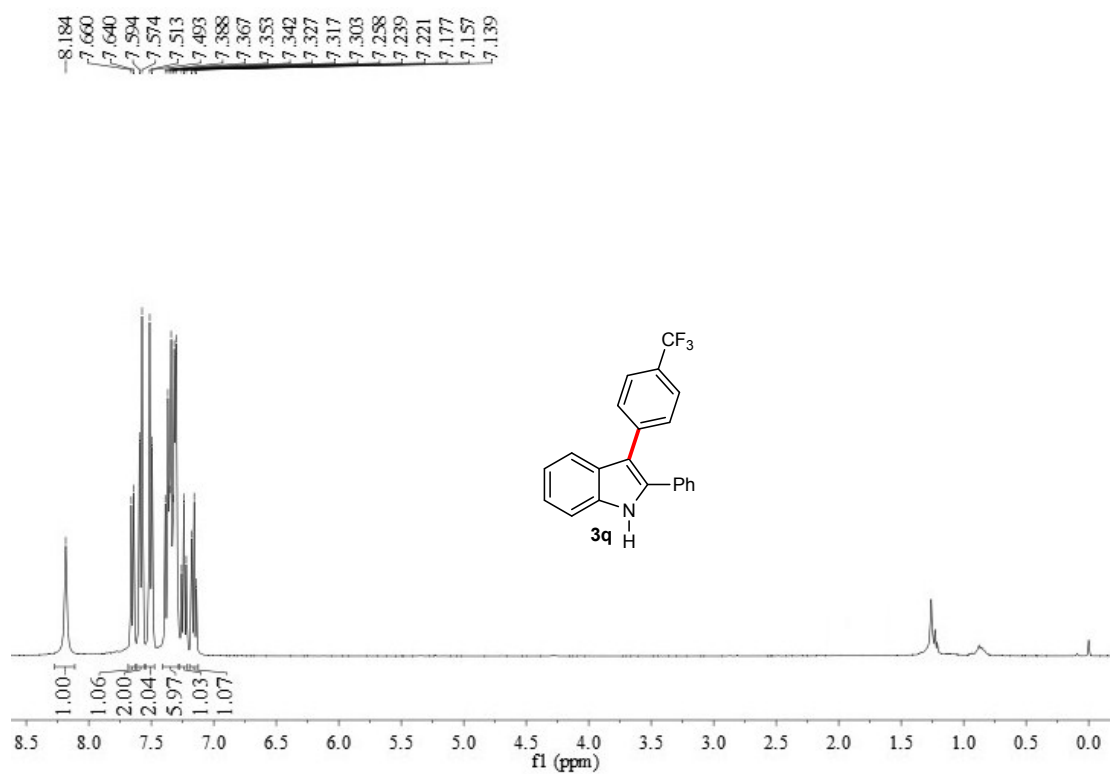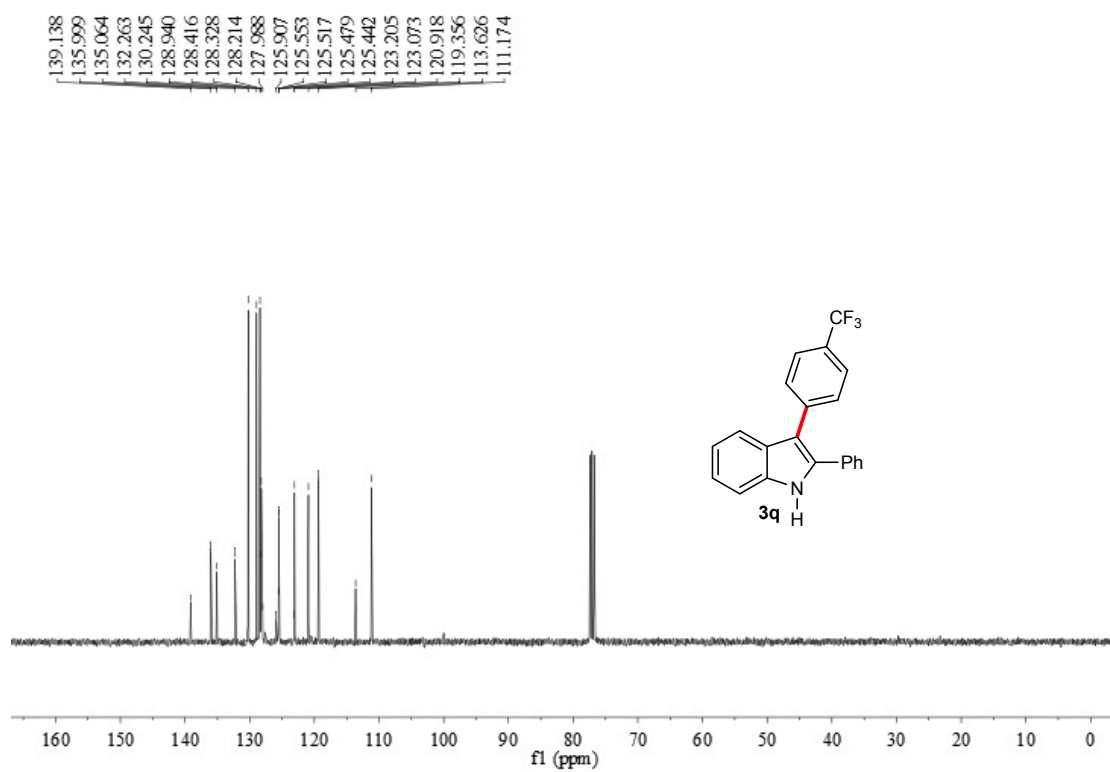

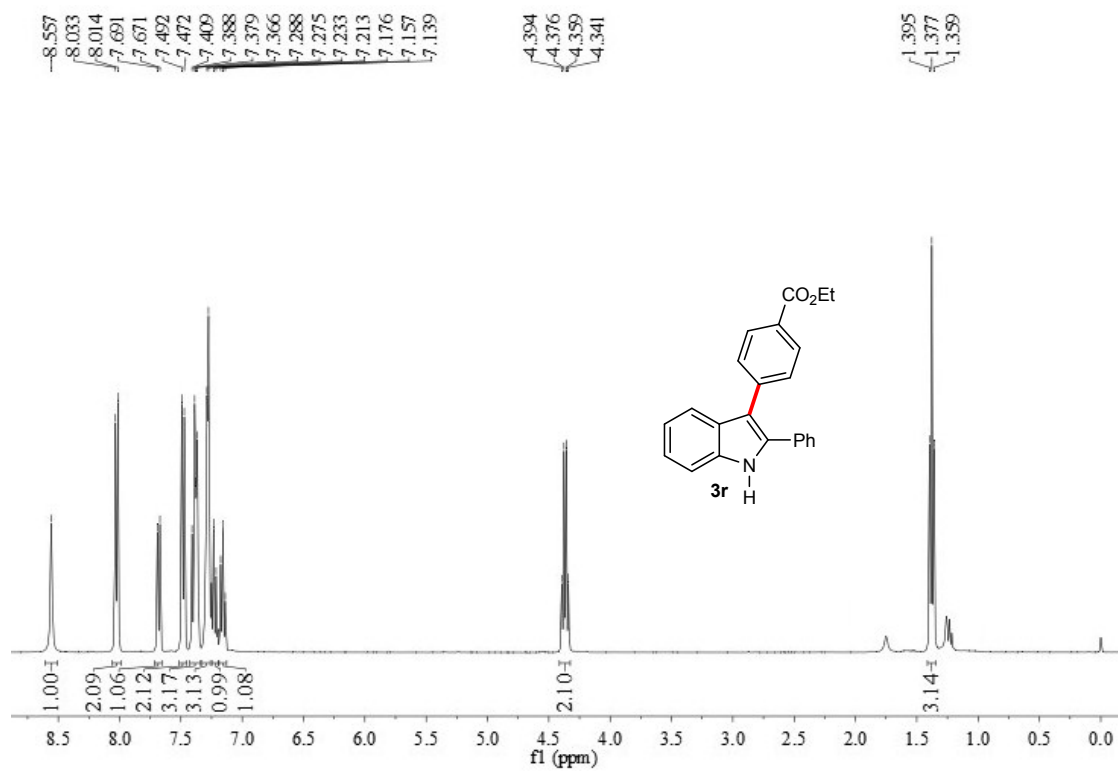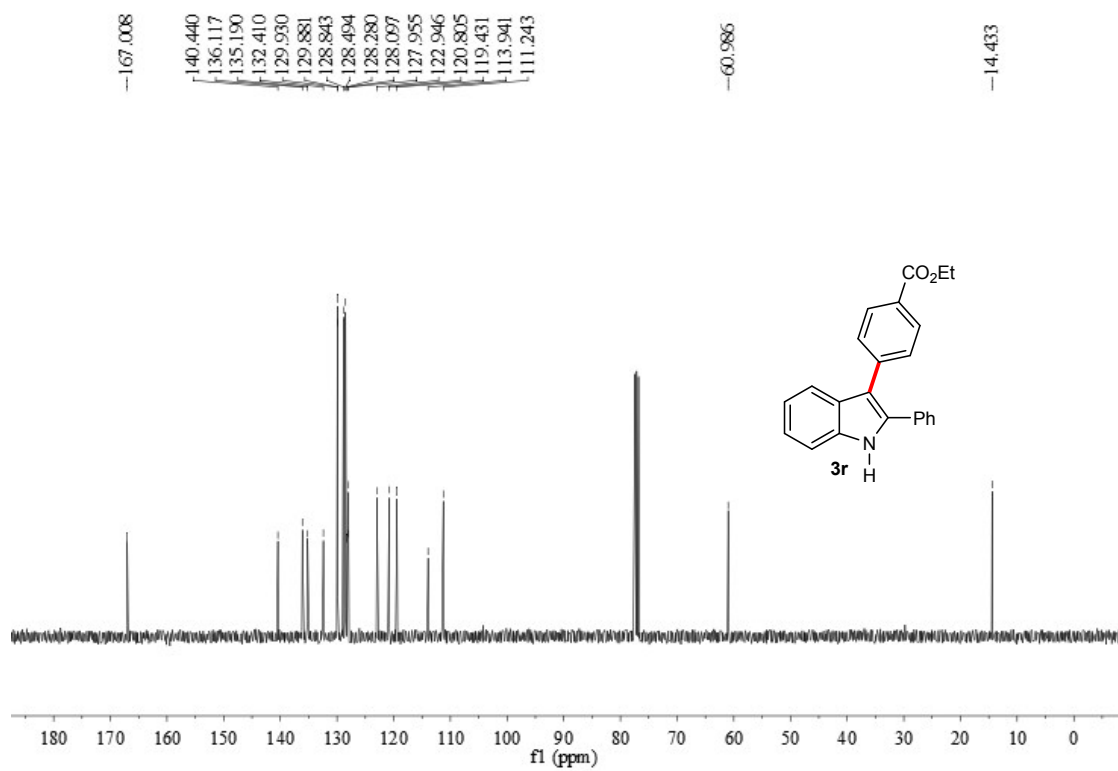

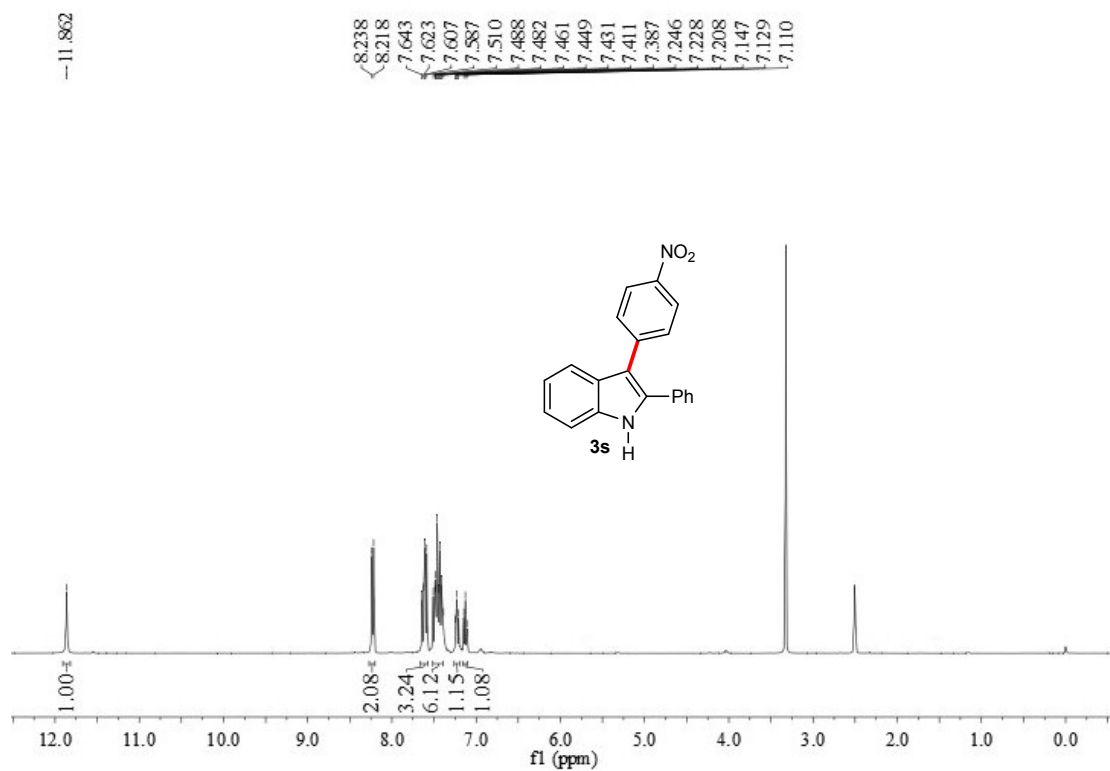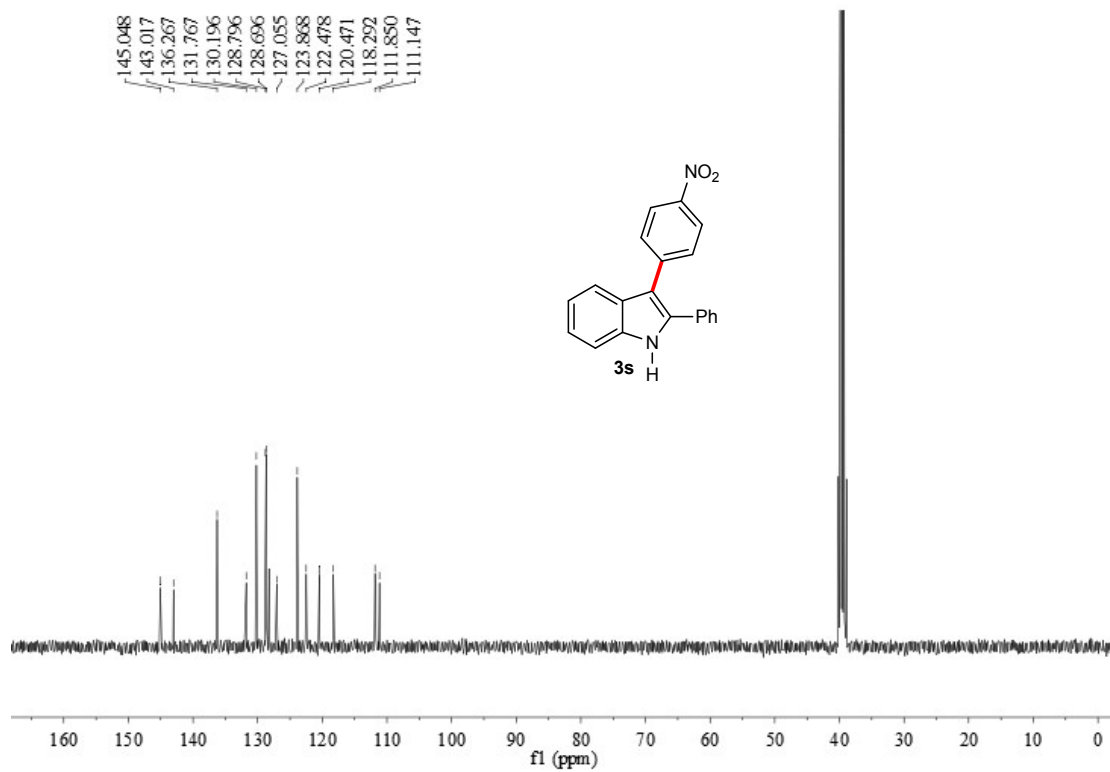

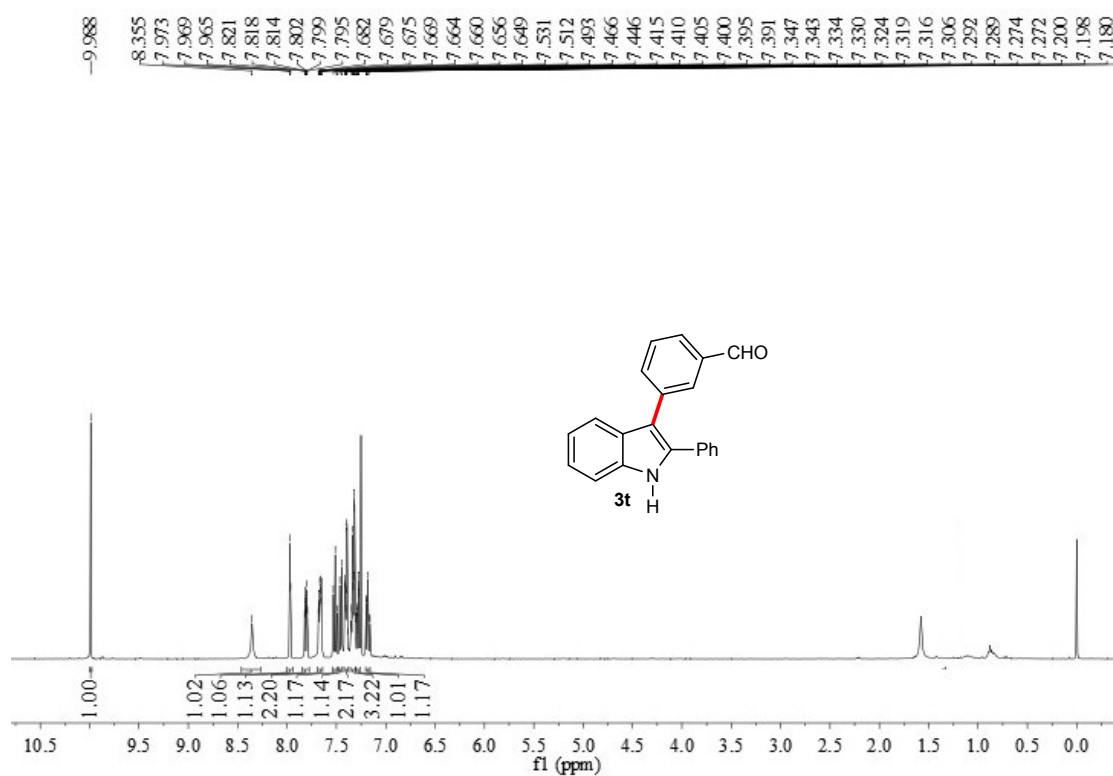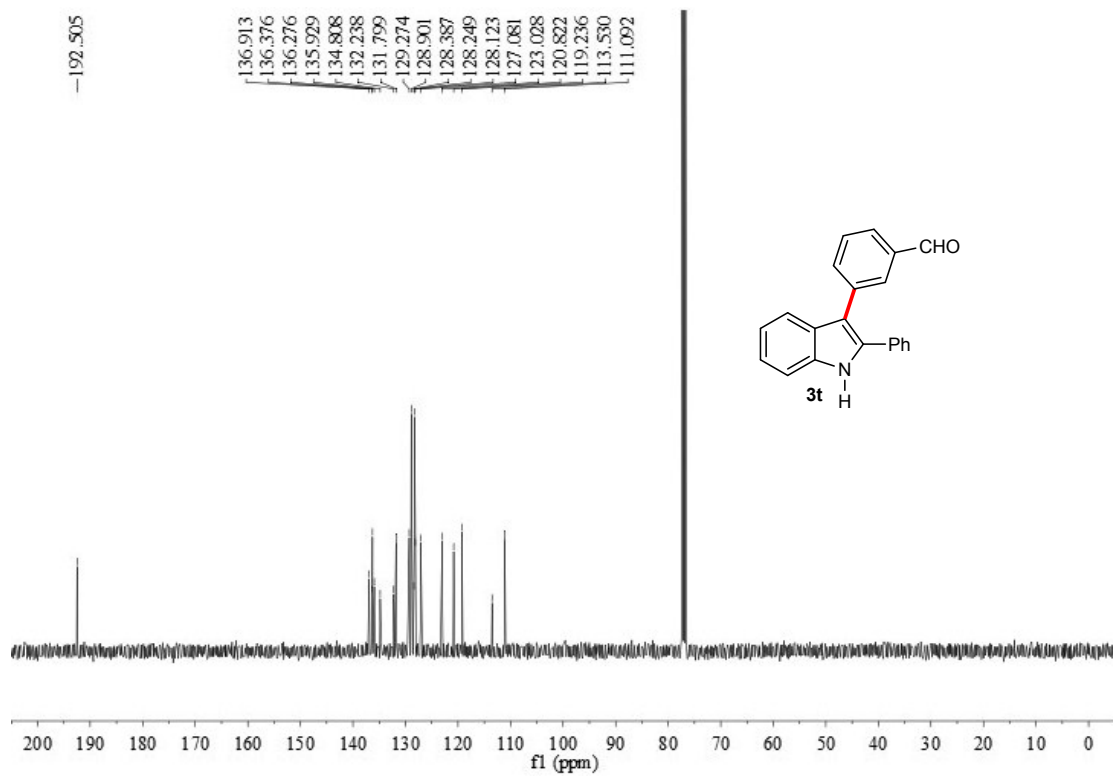

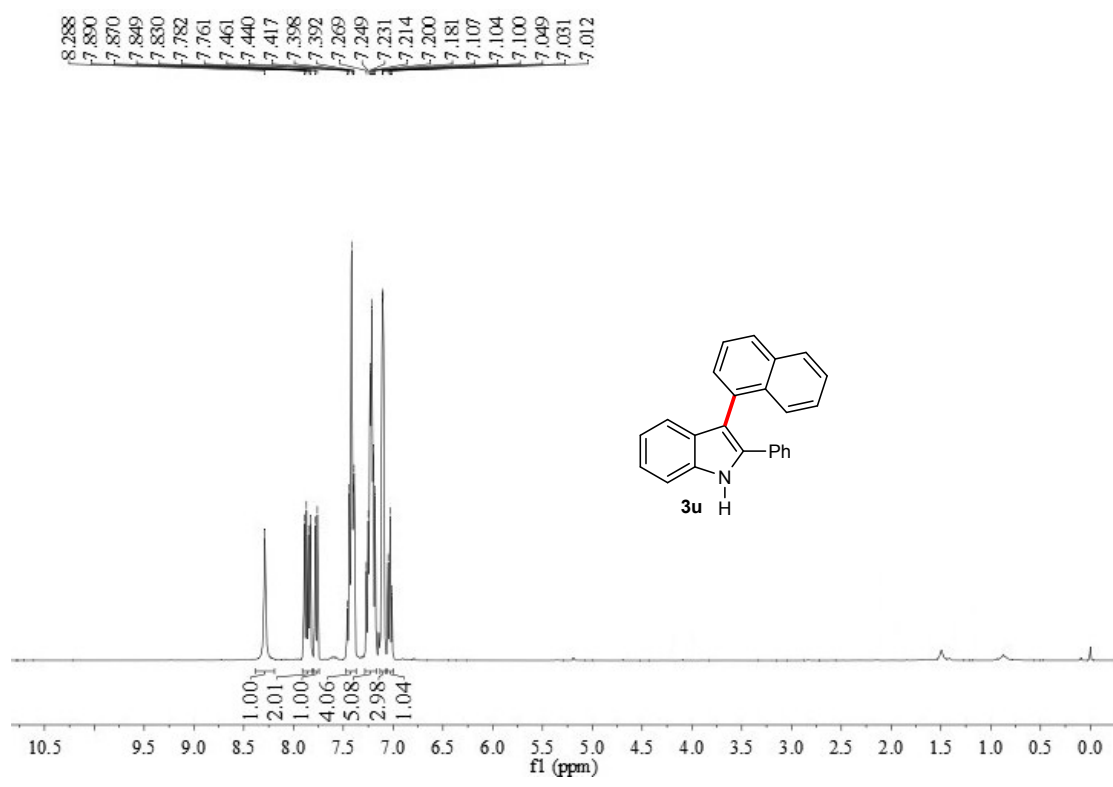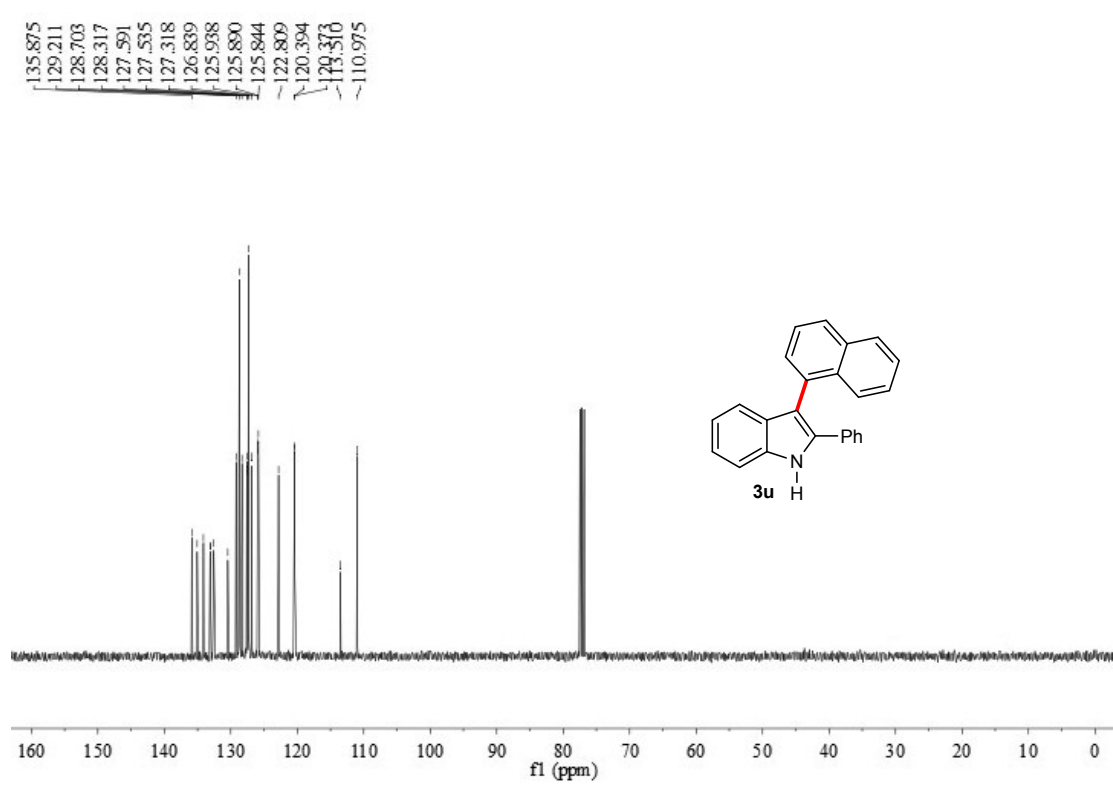



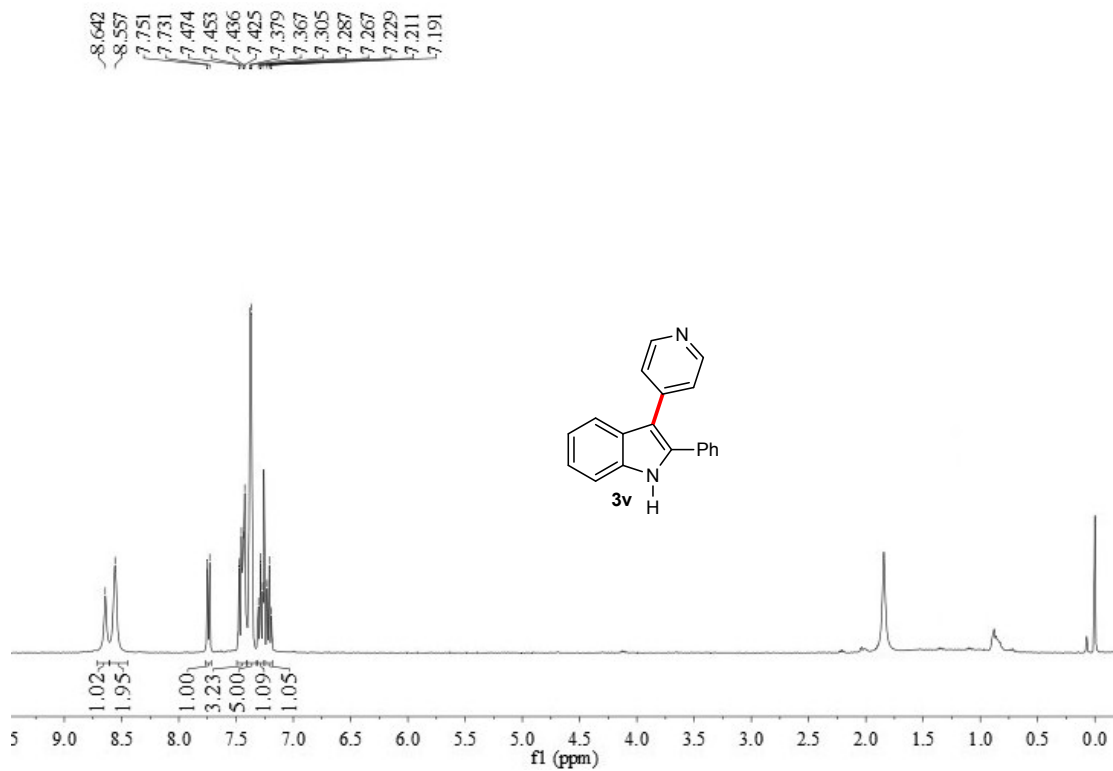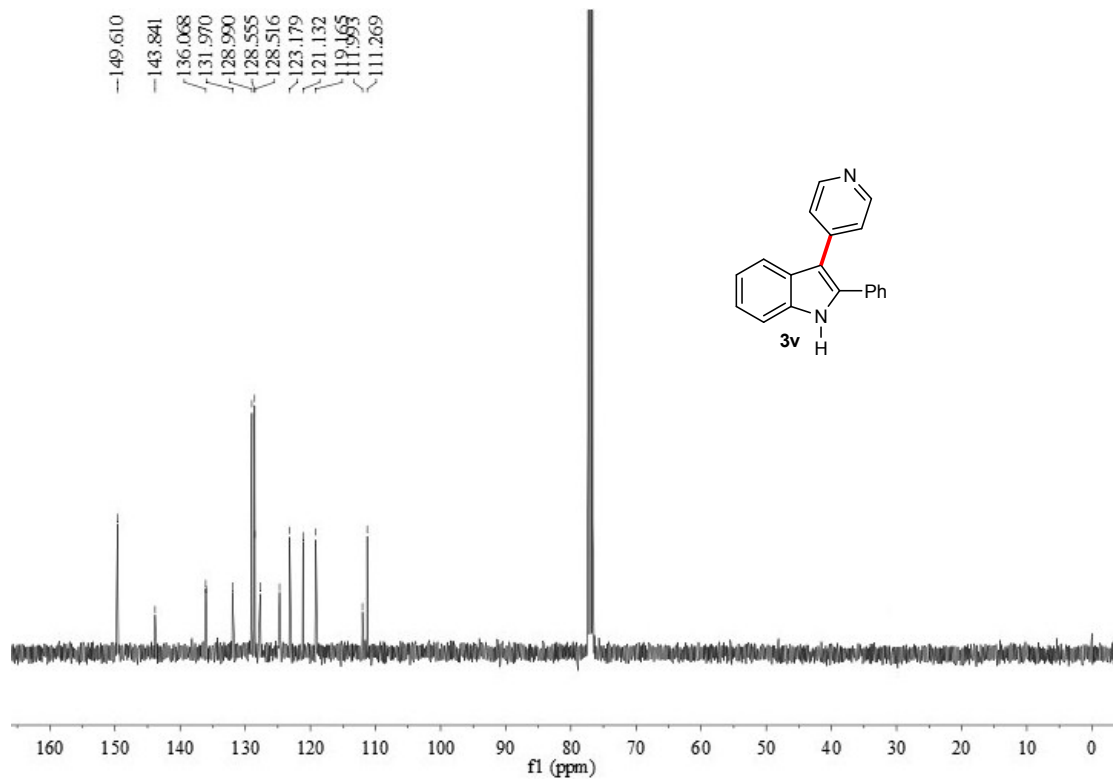

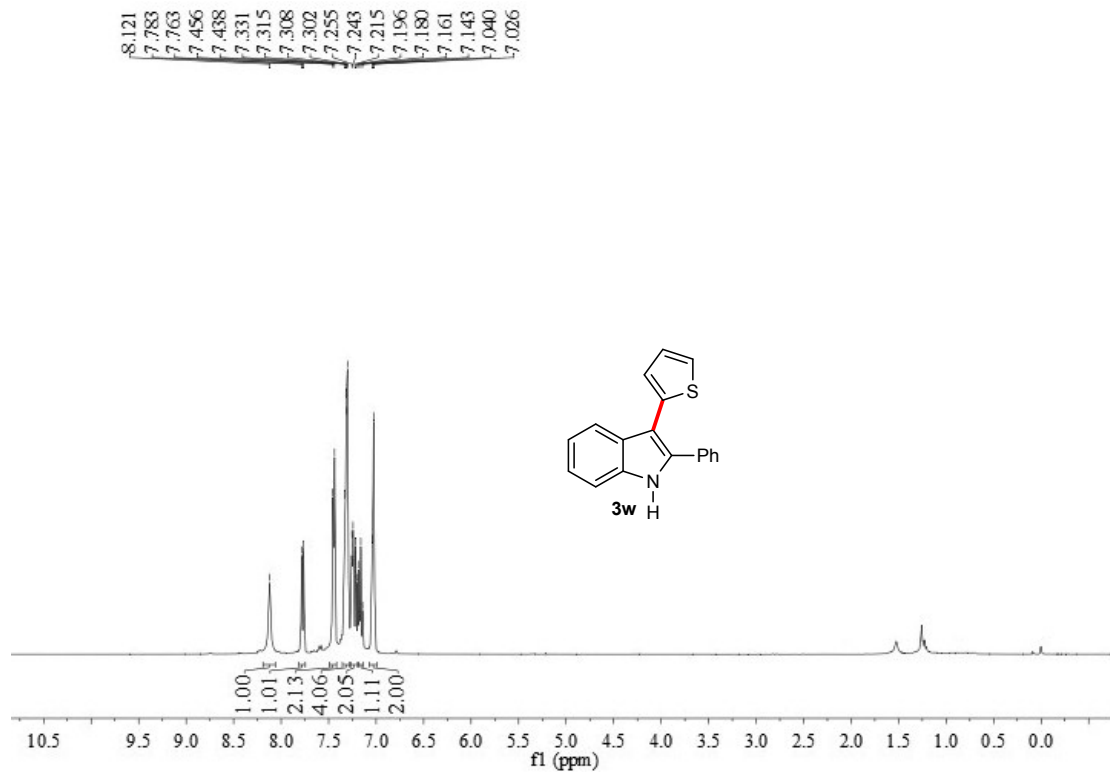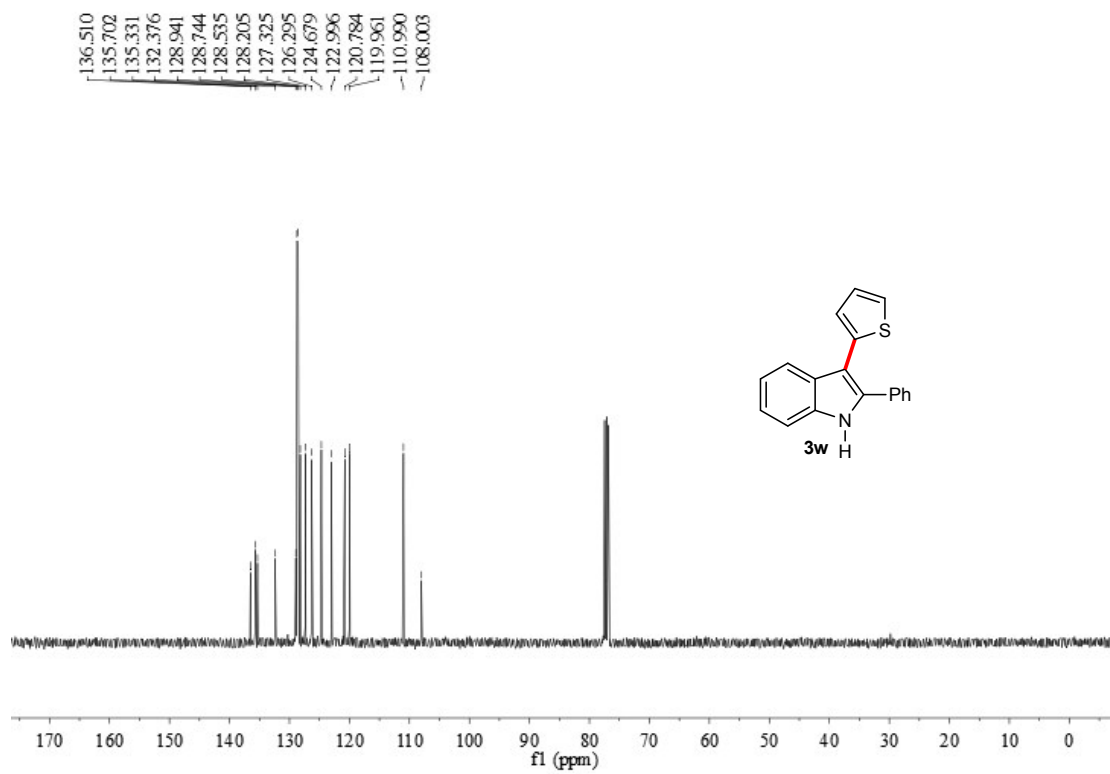

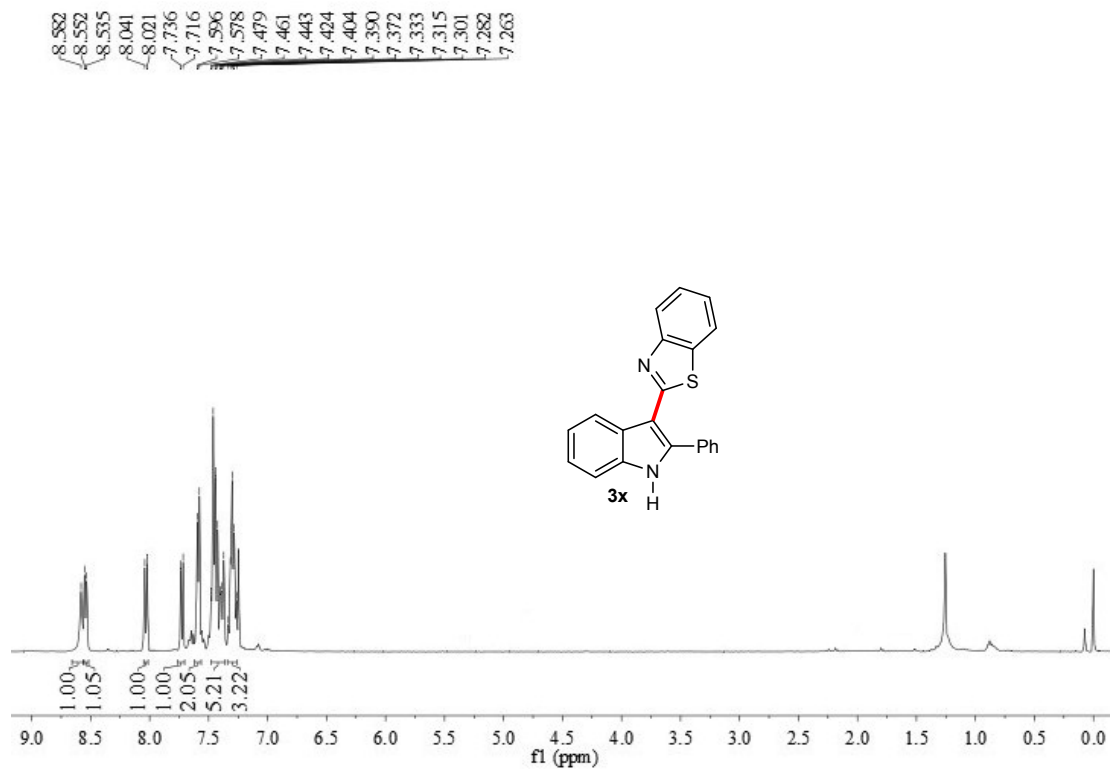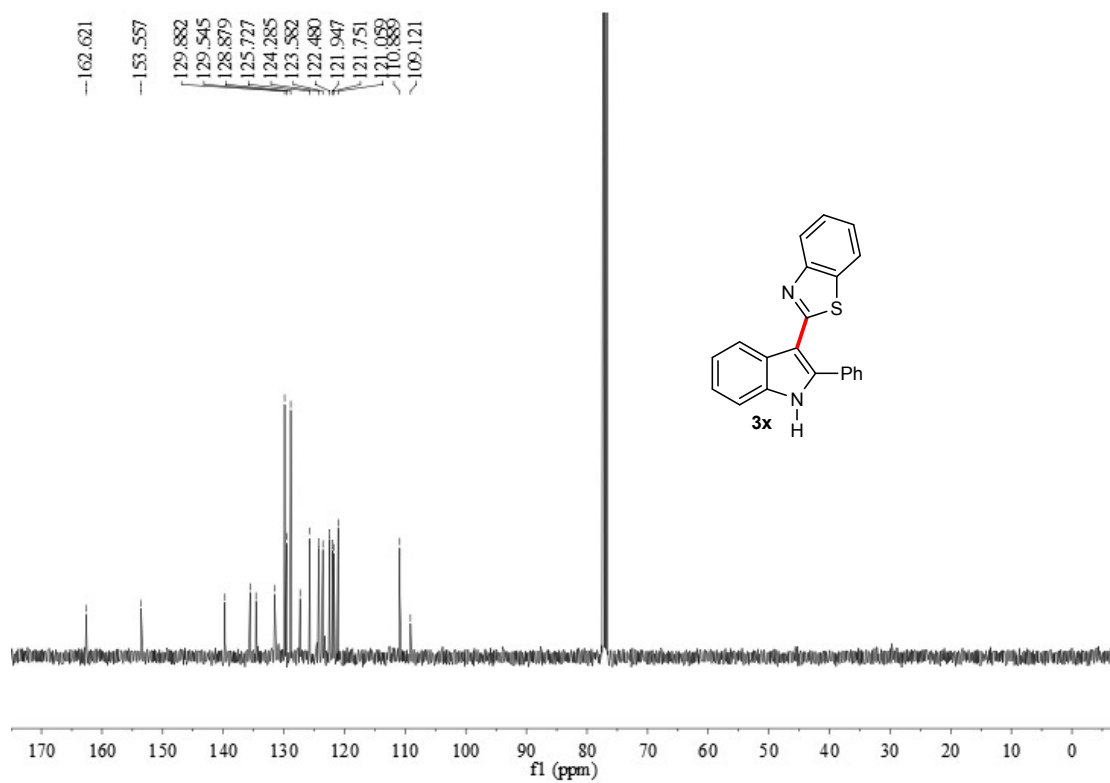

# <sup>1</sup>H and <sup>13</sup>C NMR spectra of compounds 5

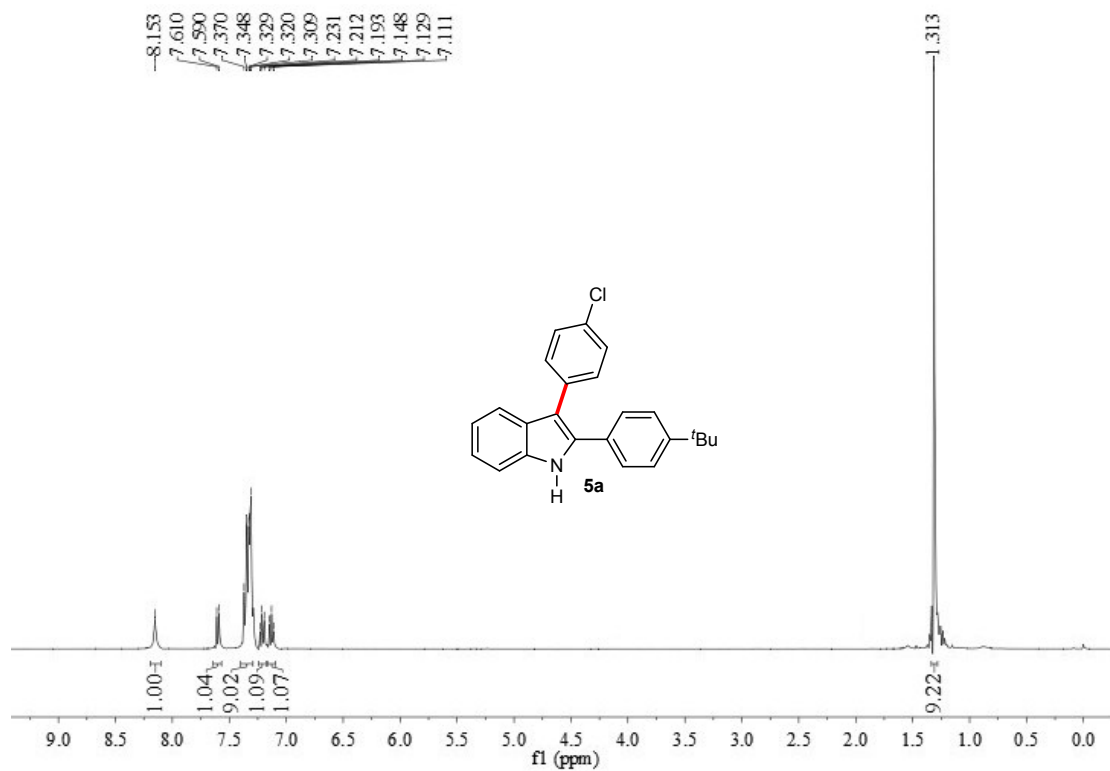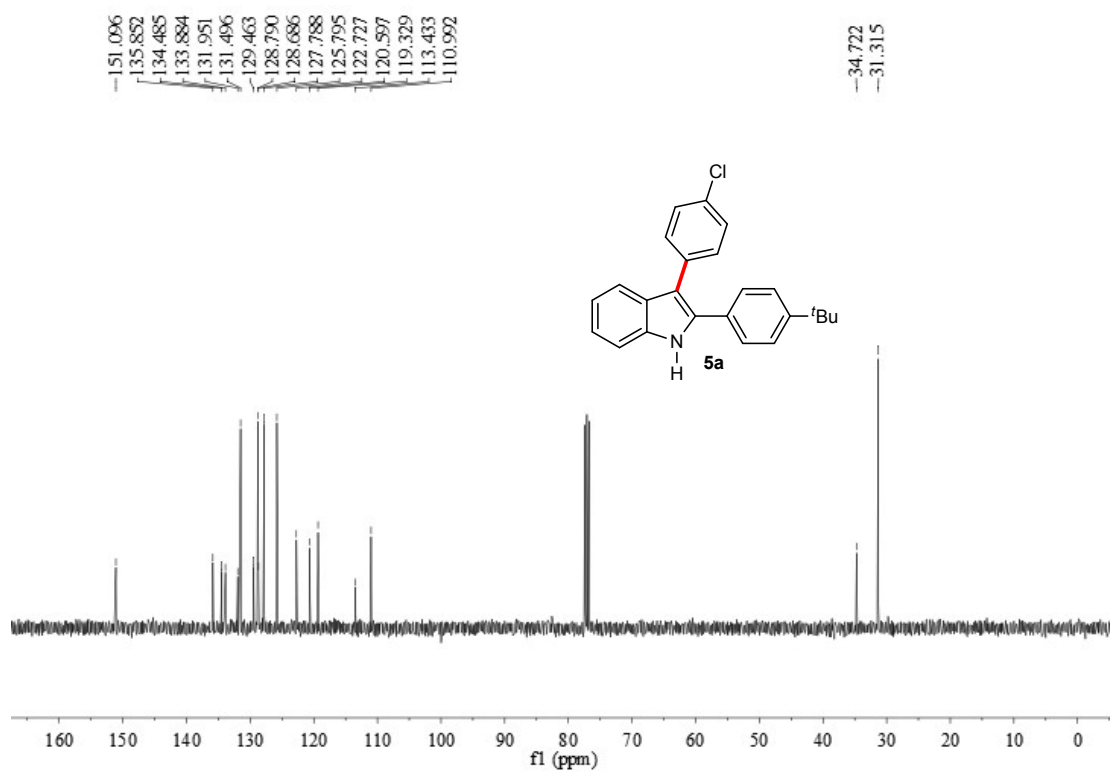

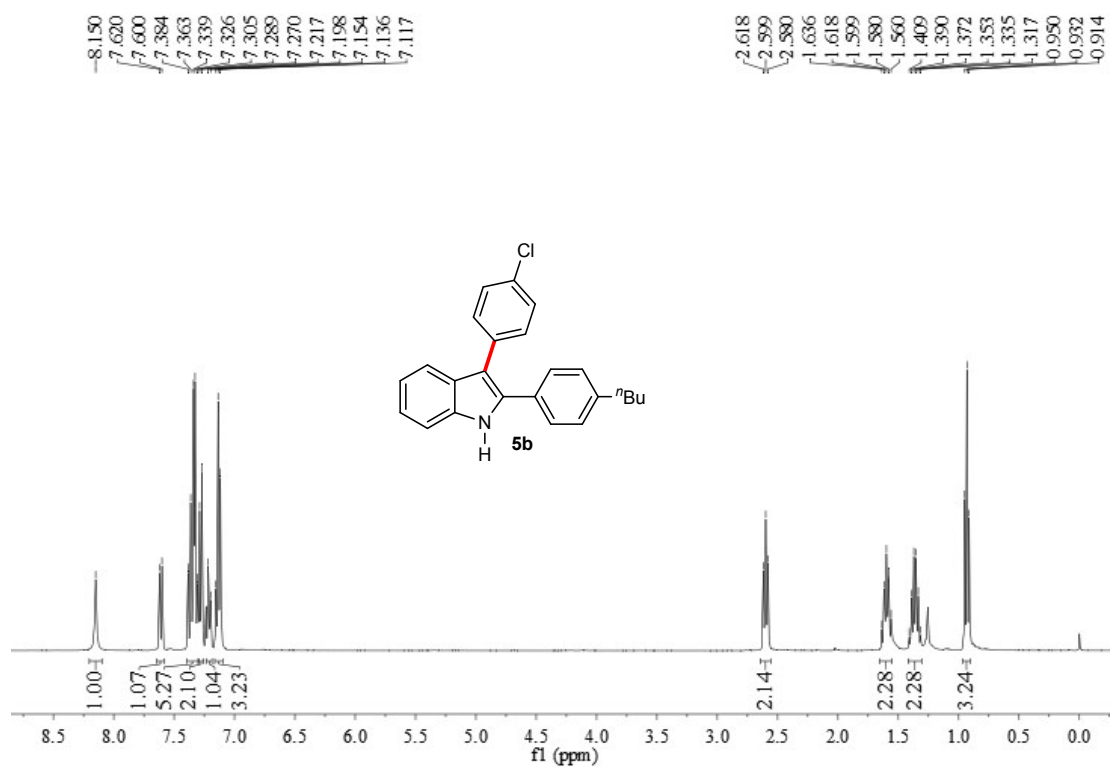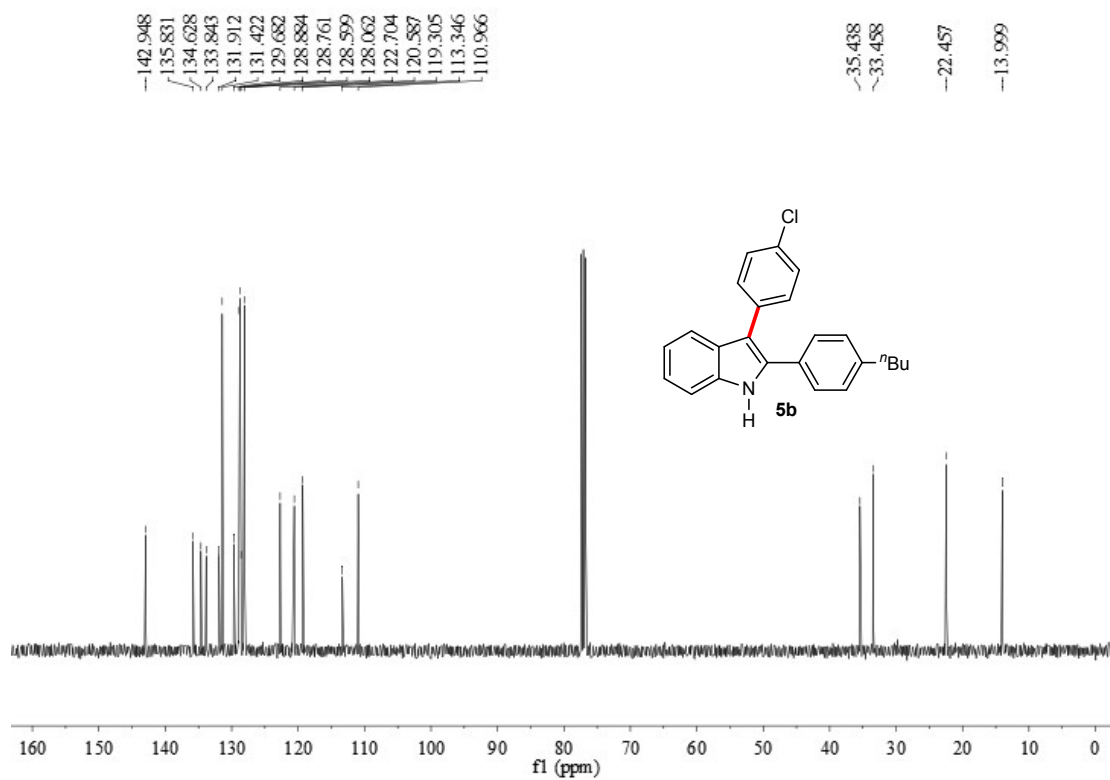

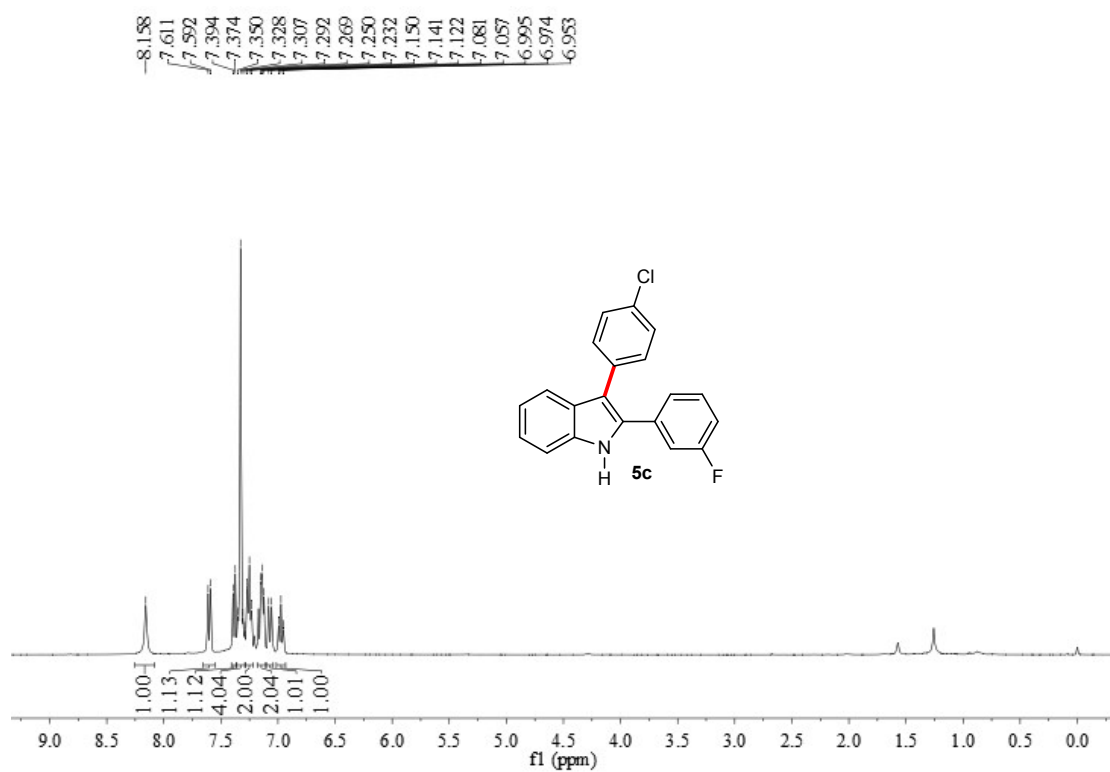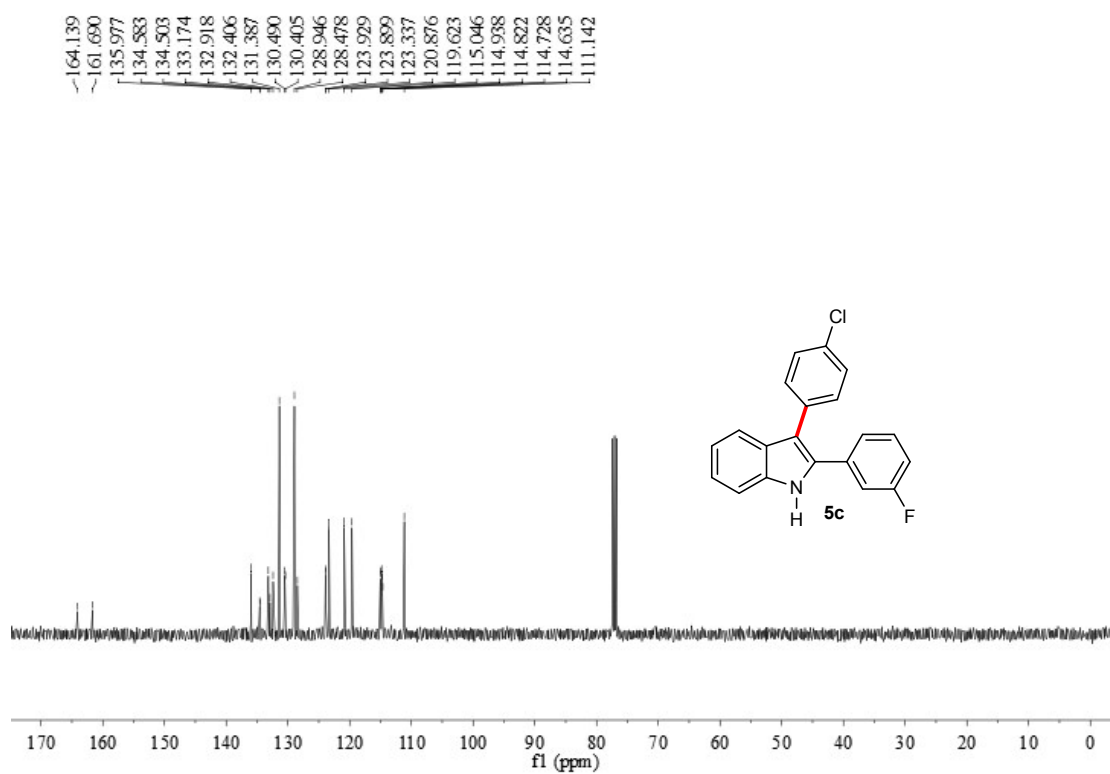

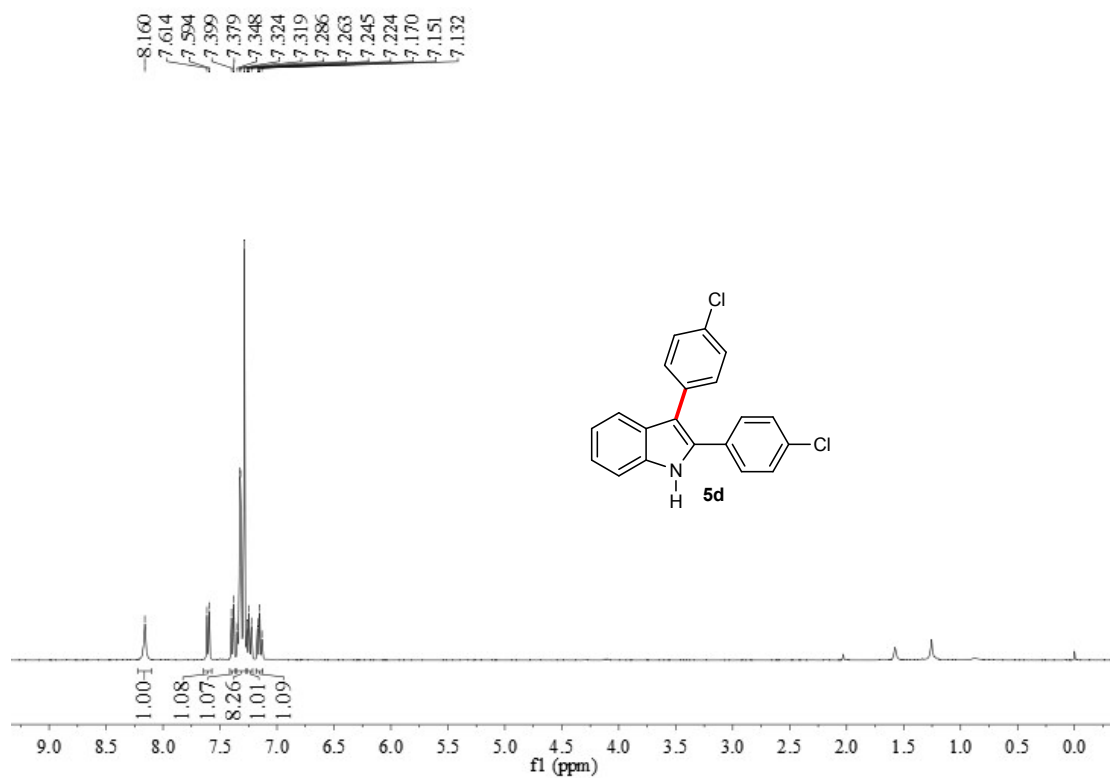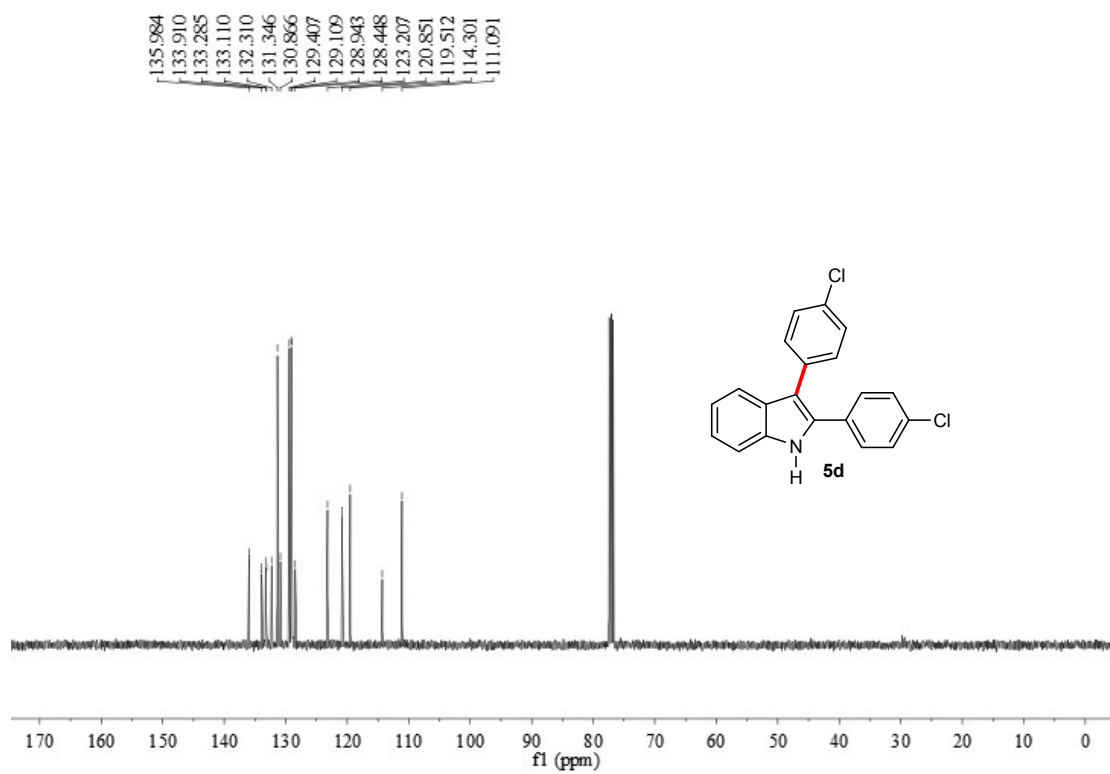

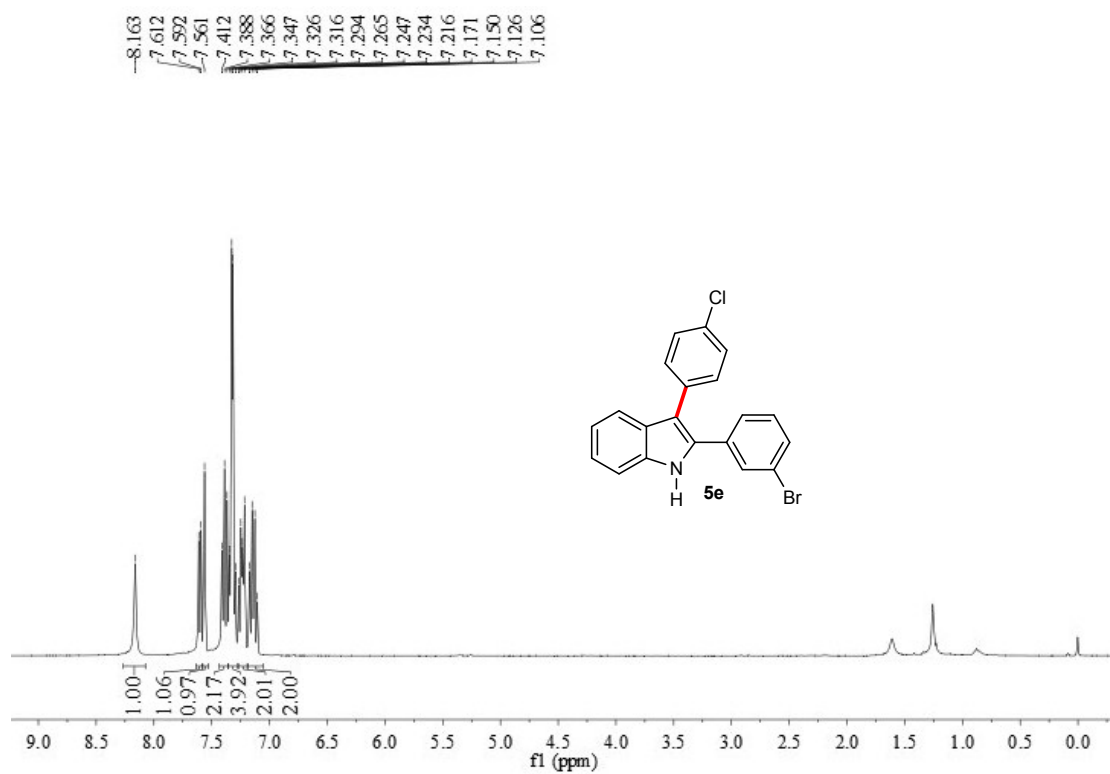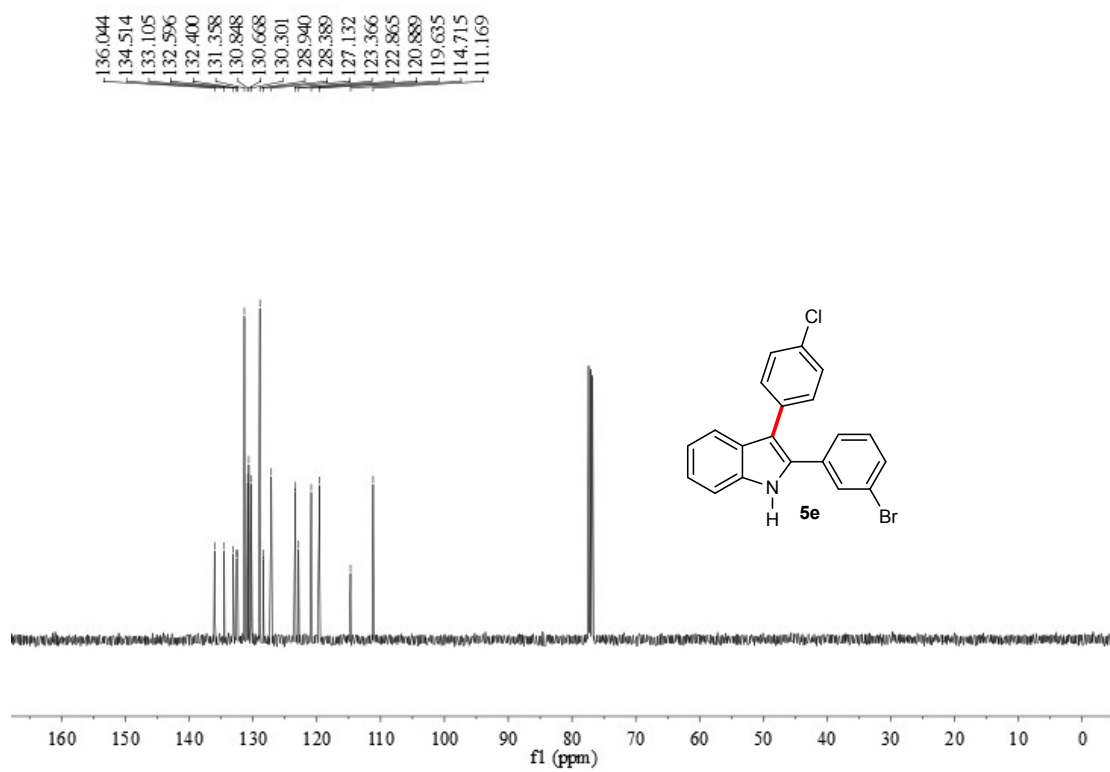



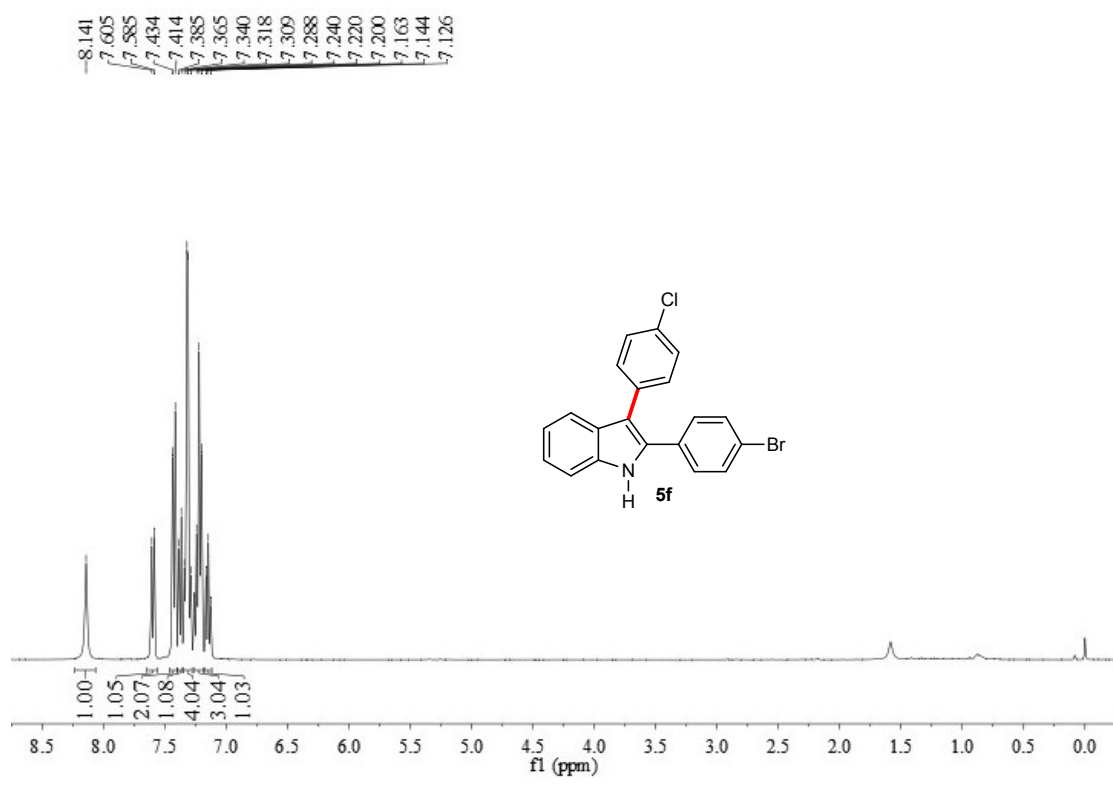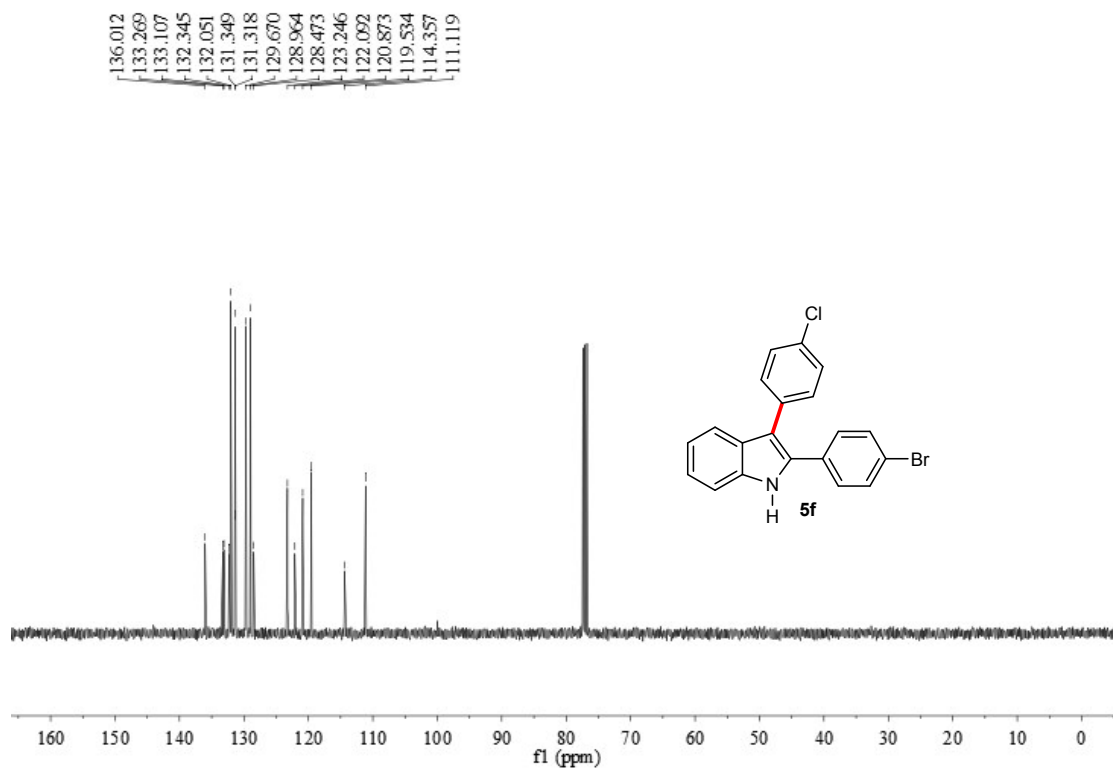

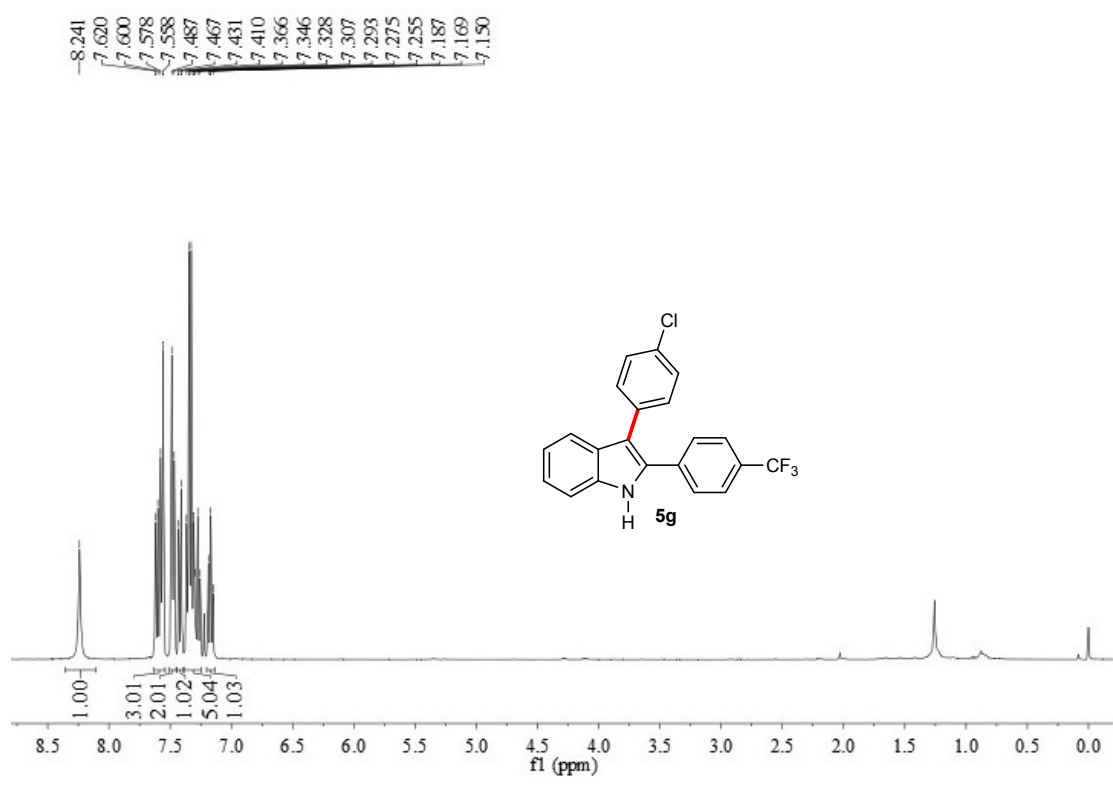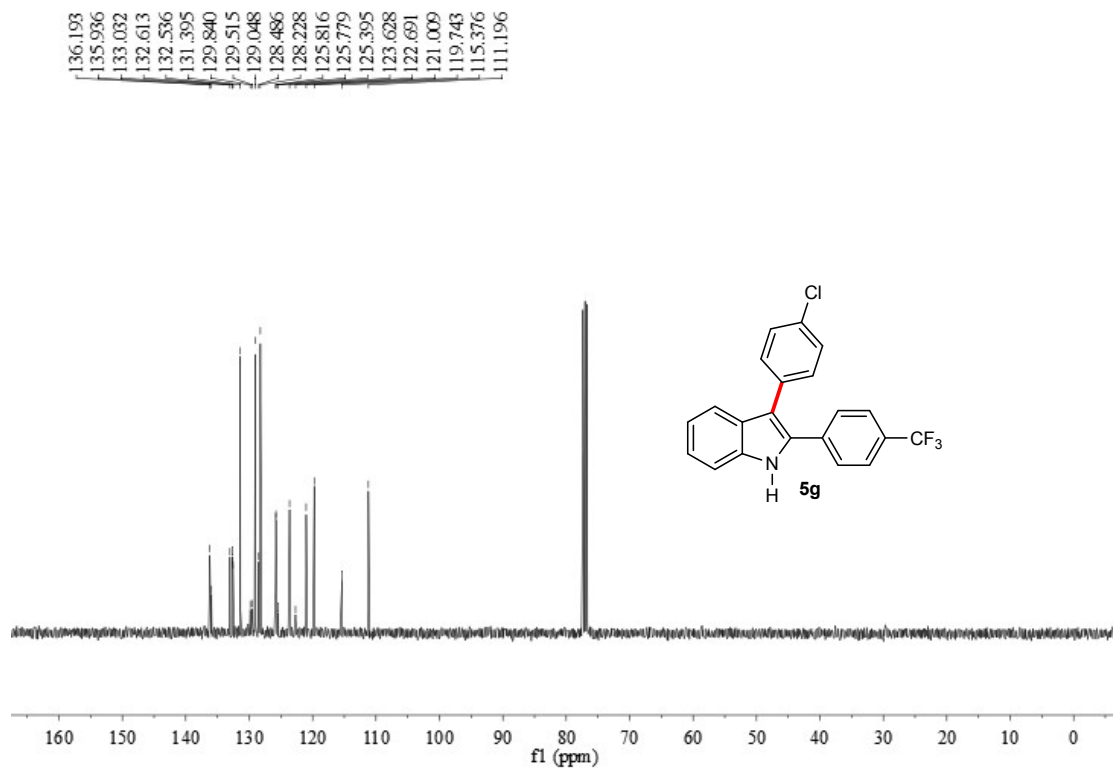

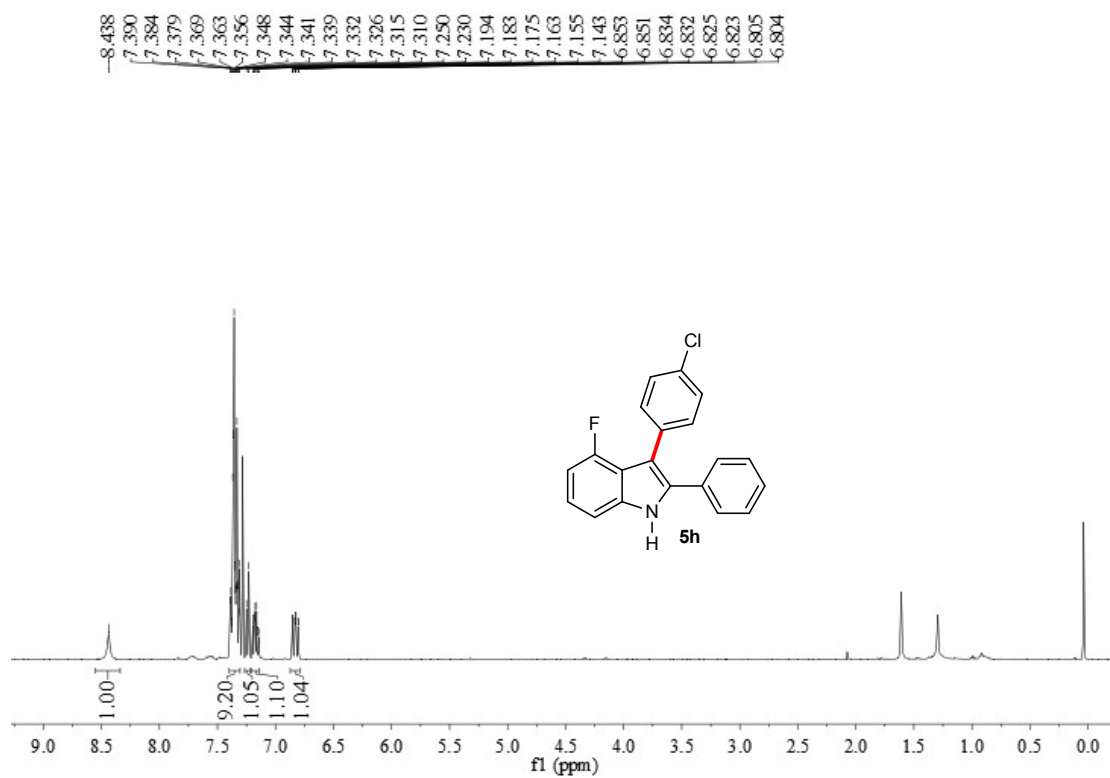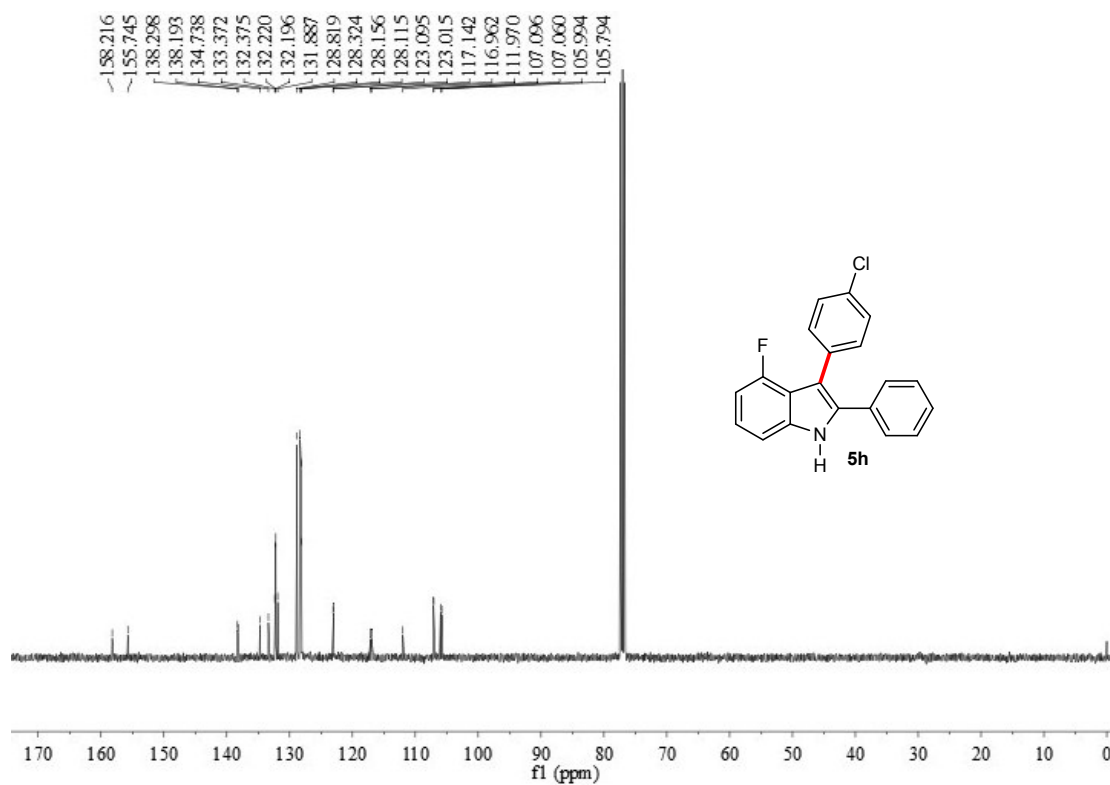

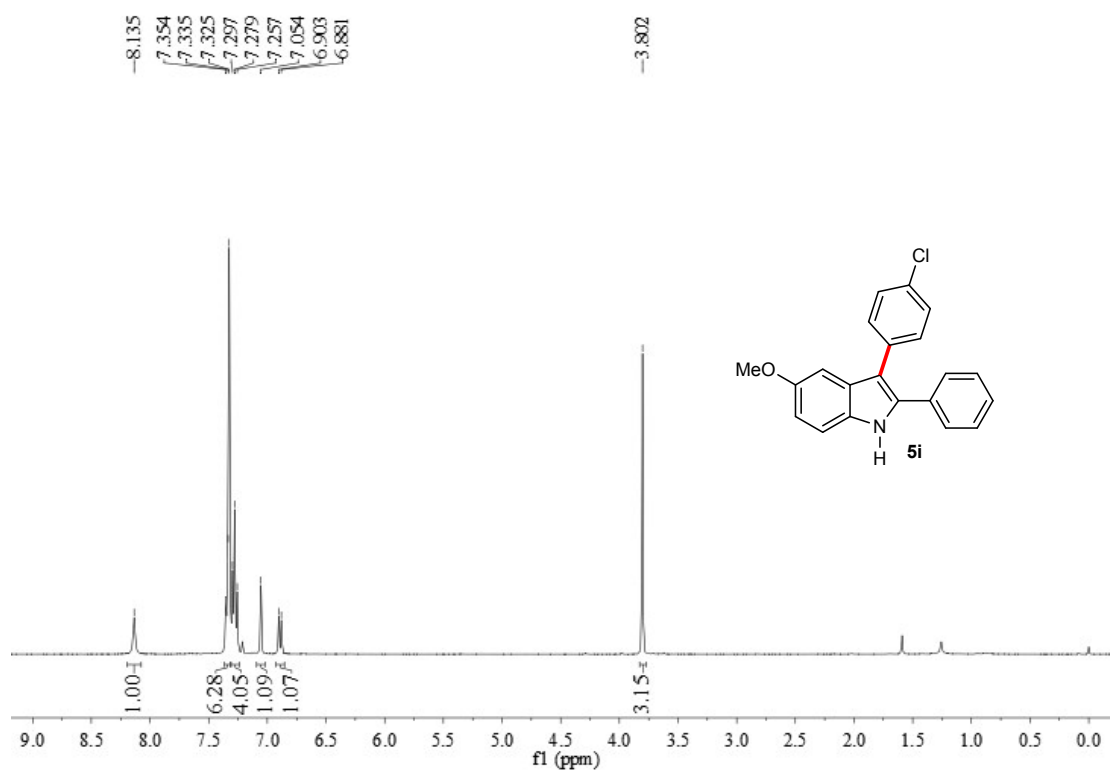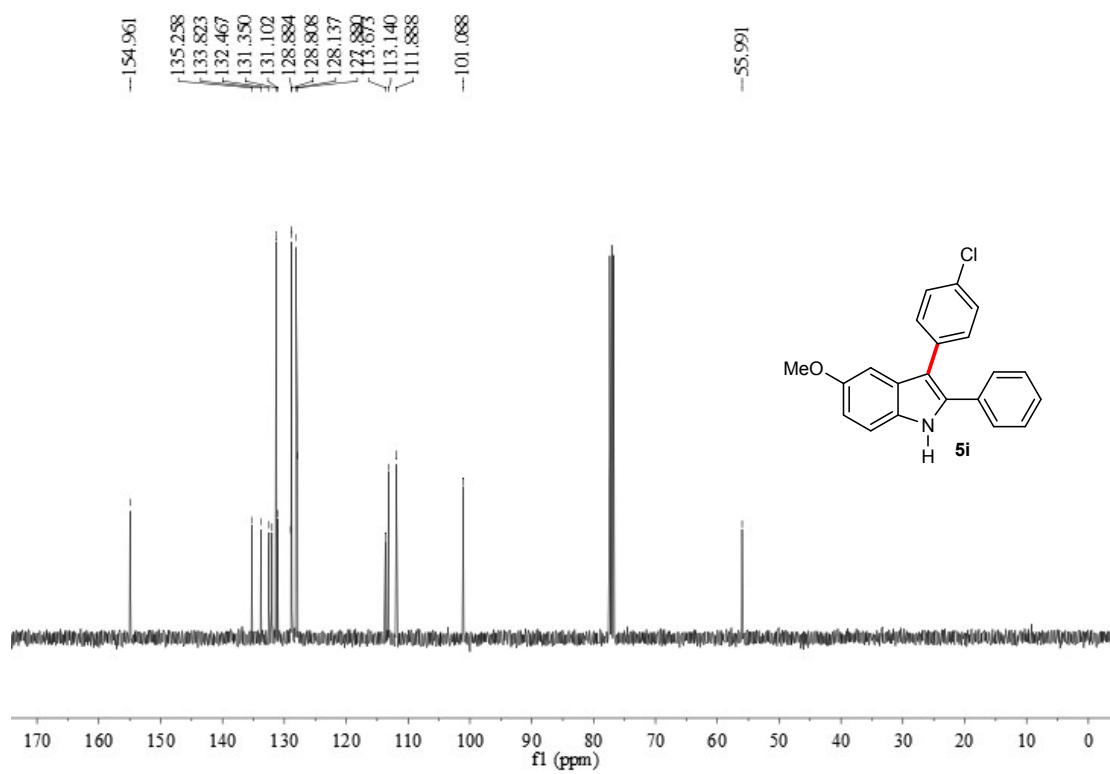

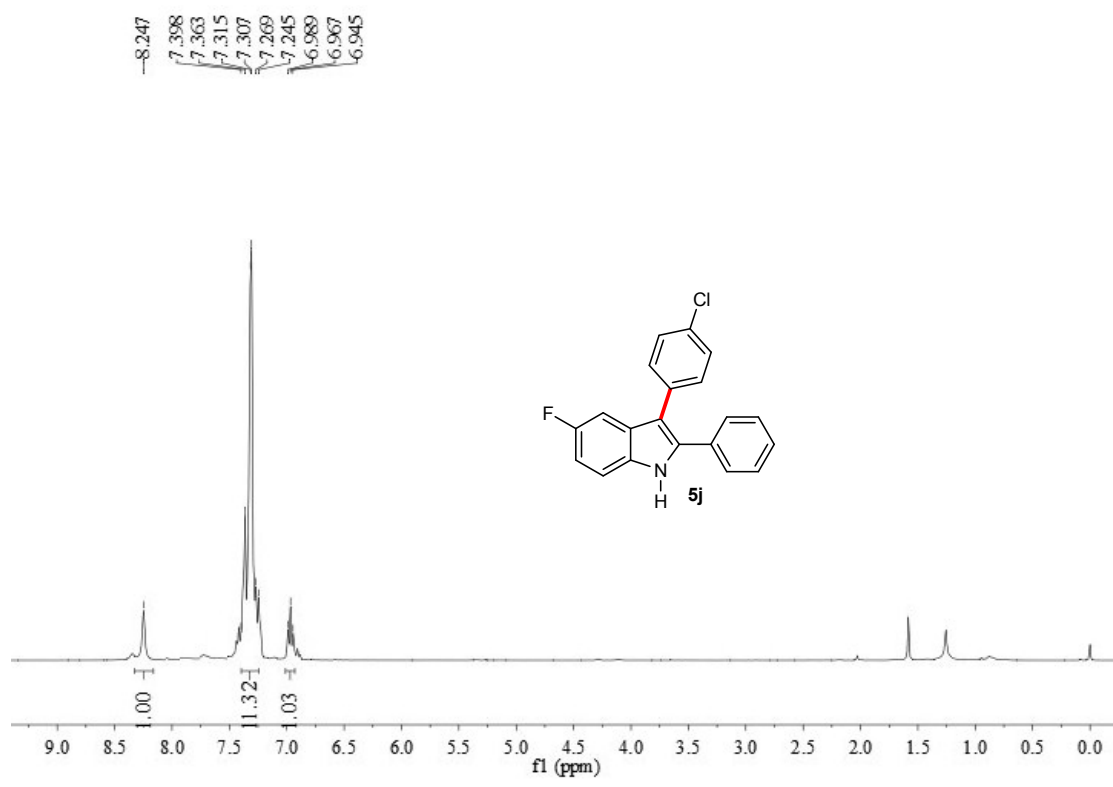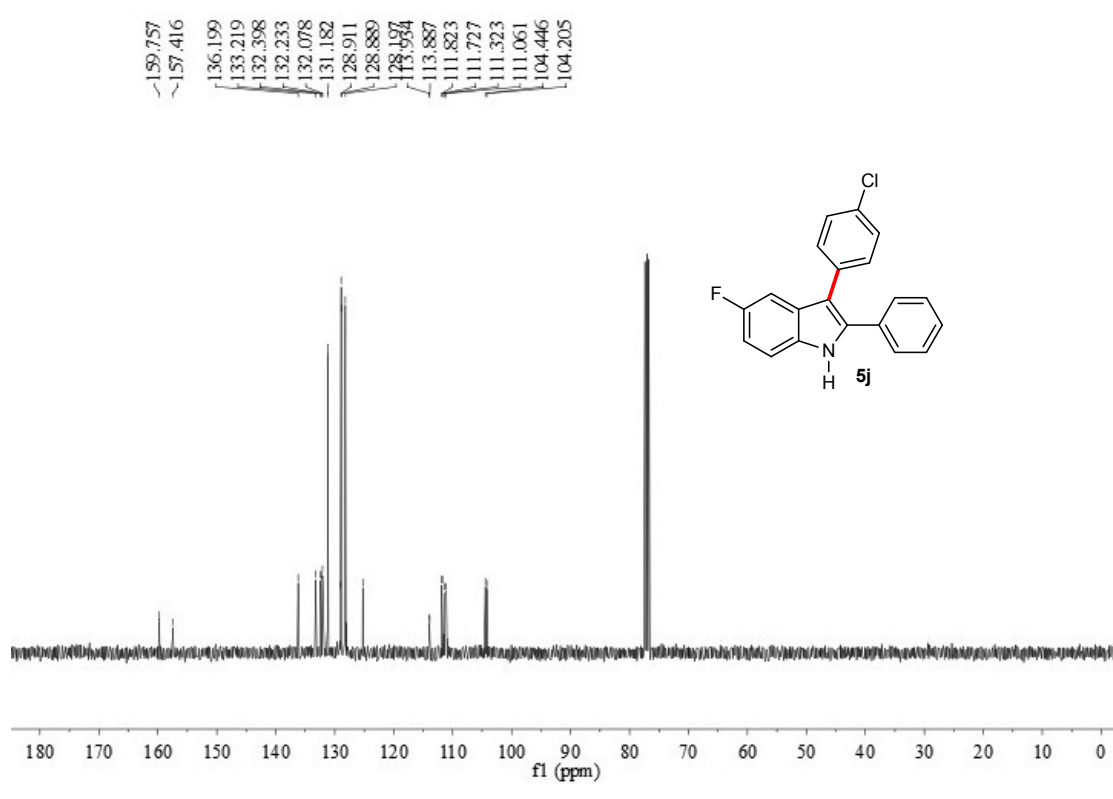

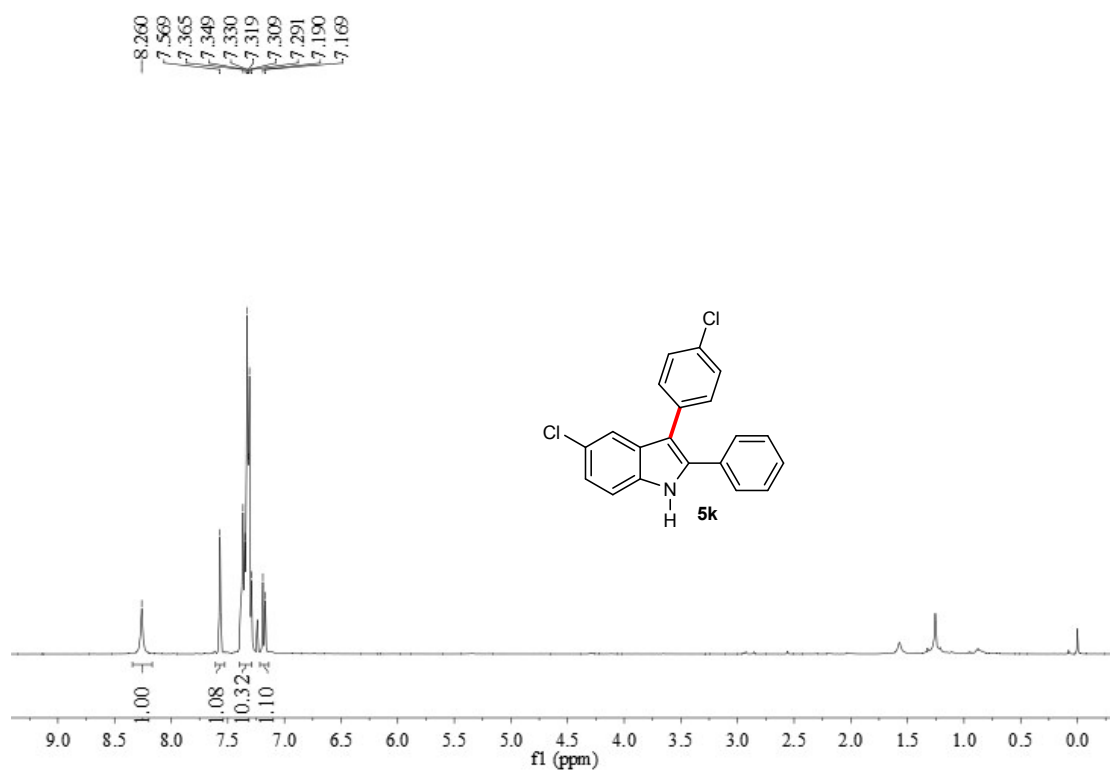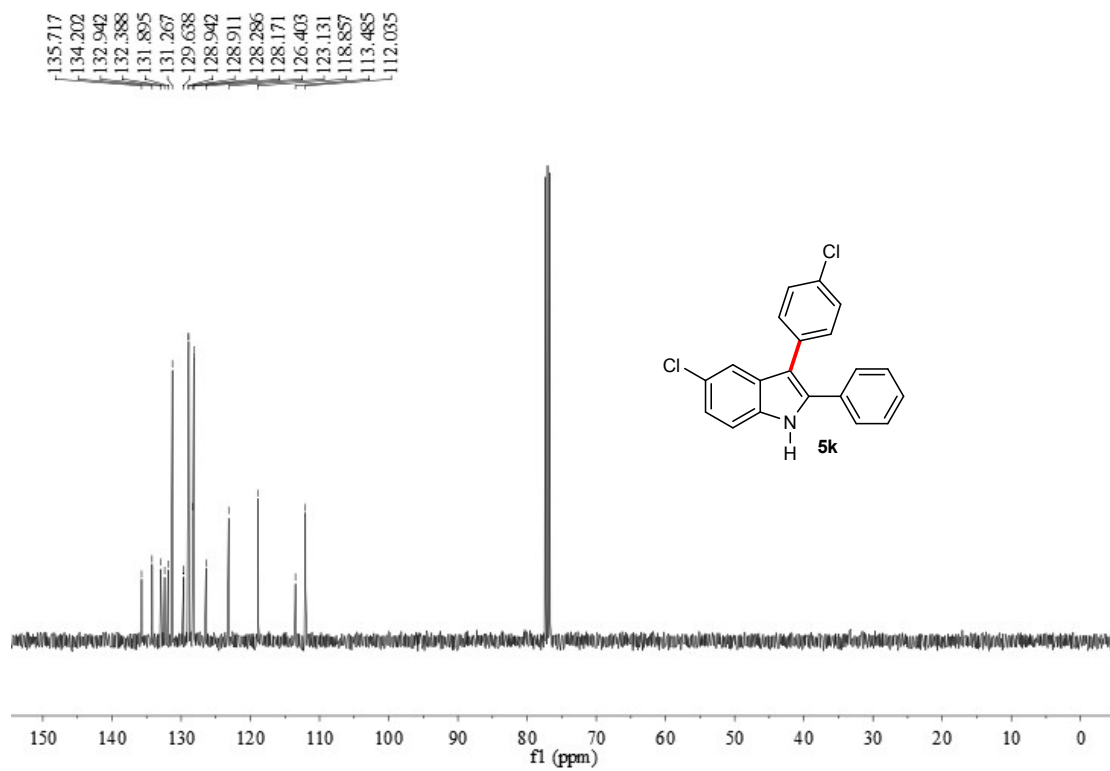

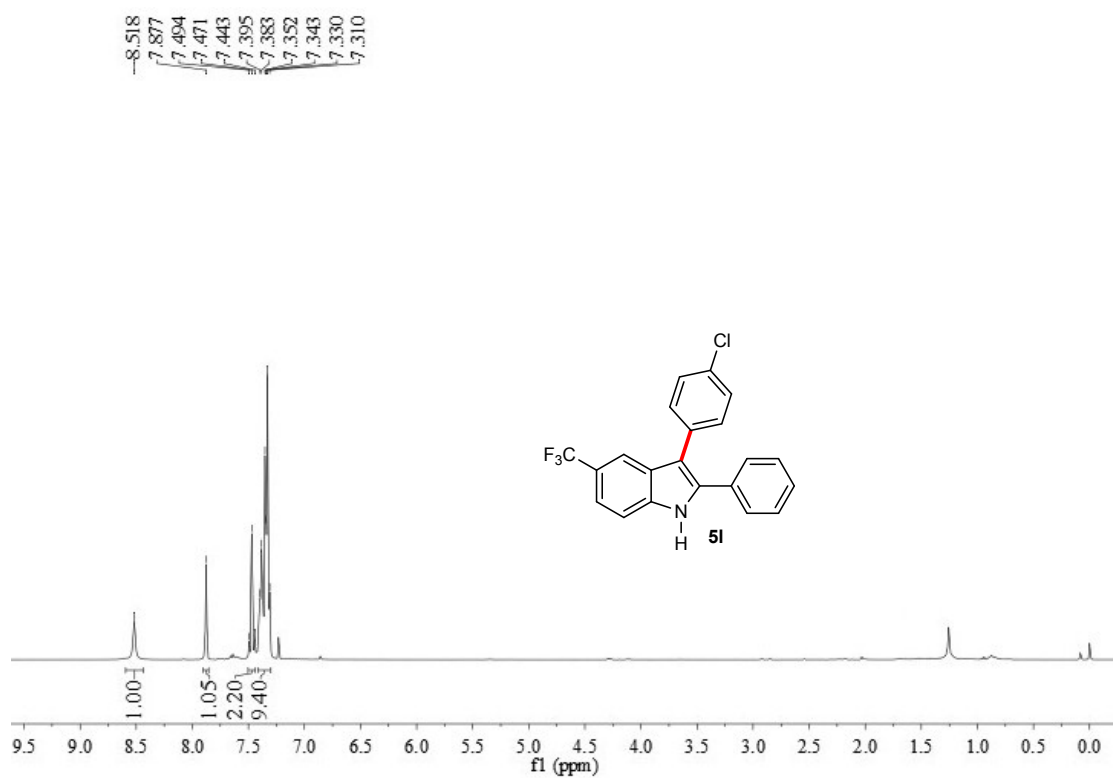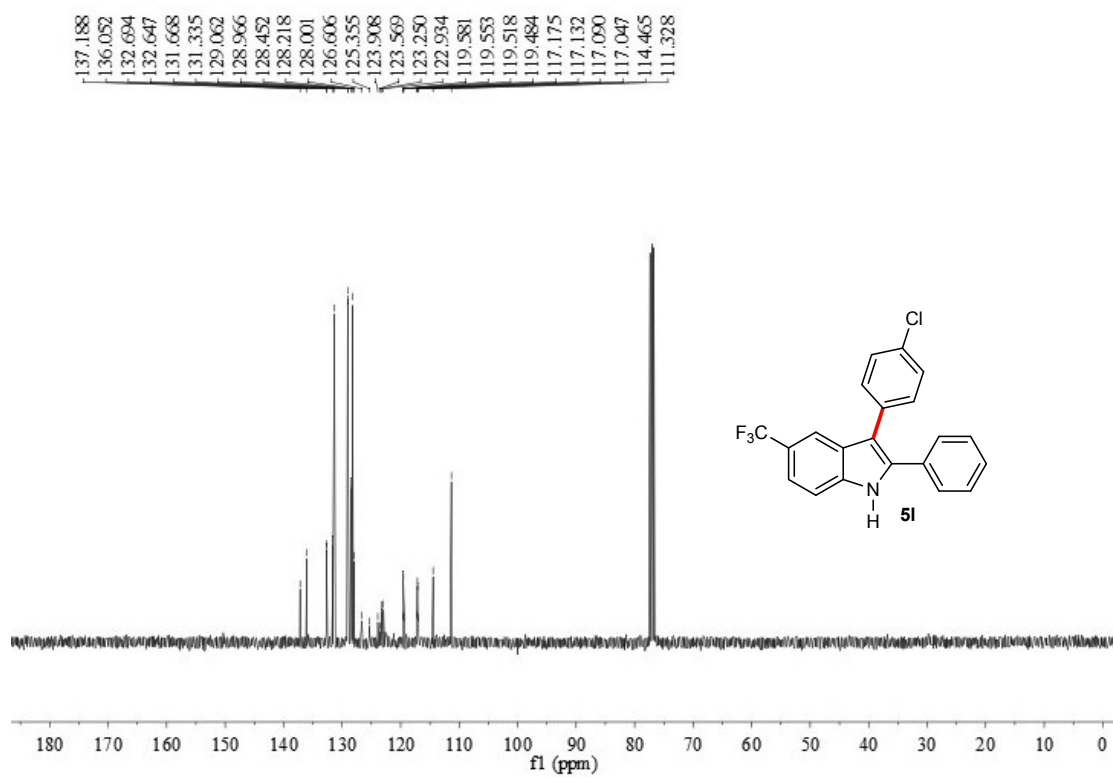

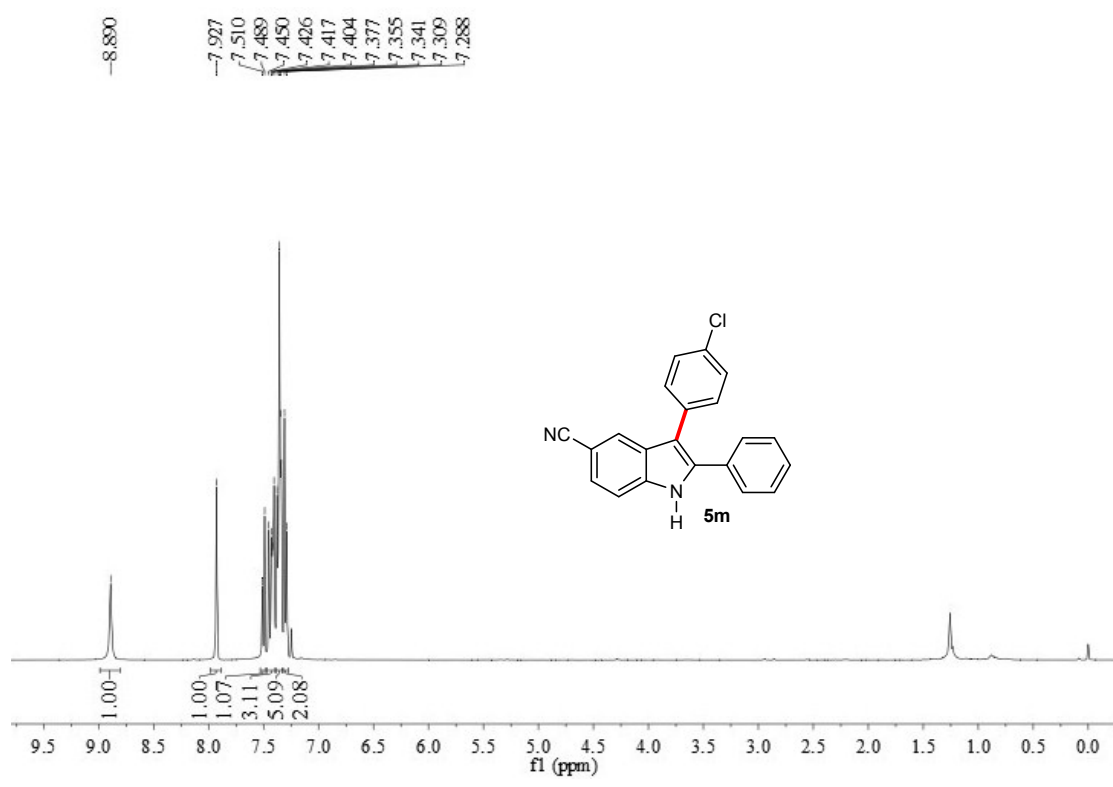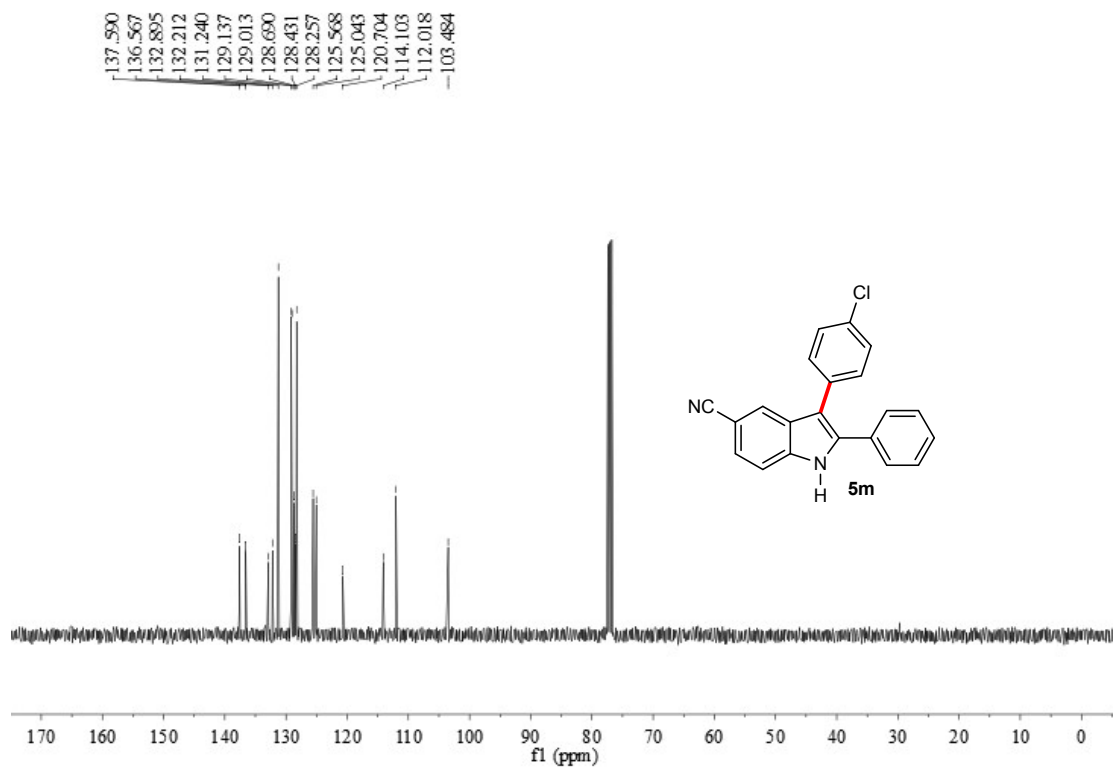



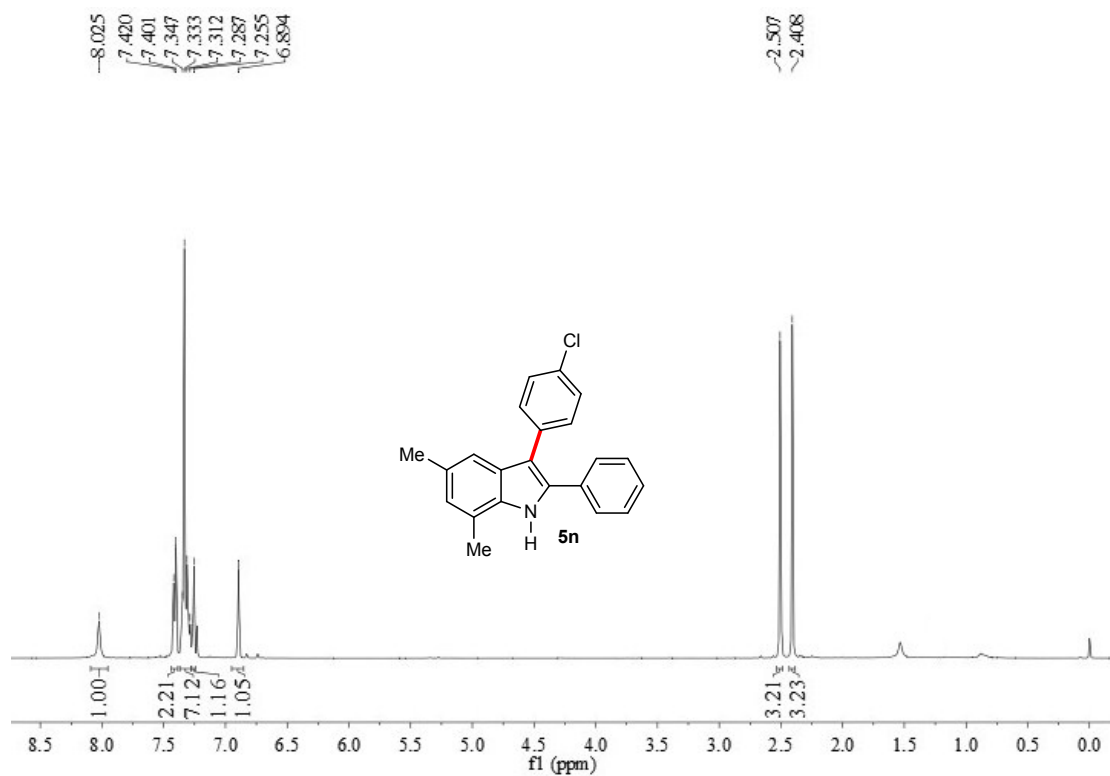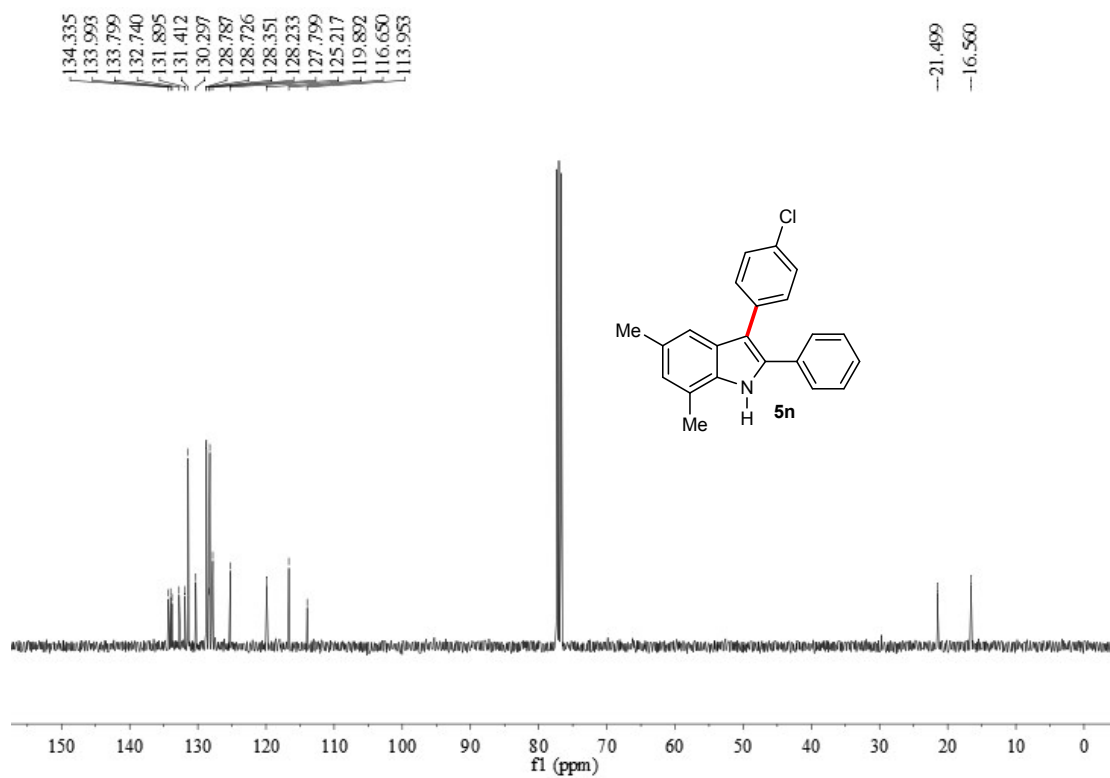

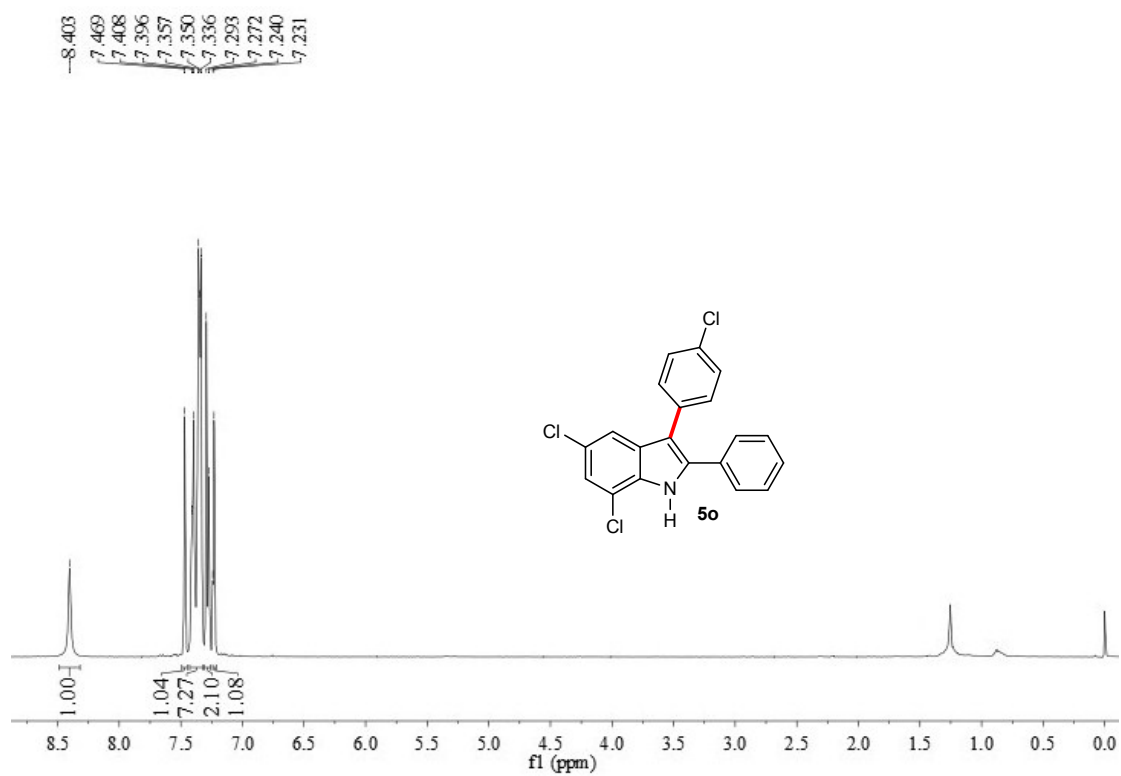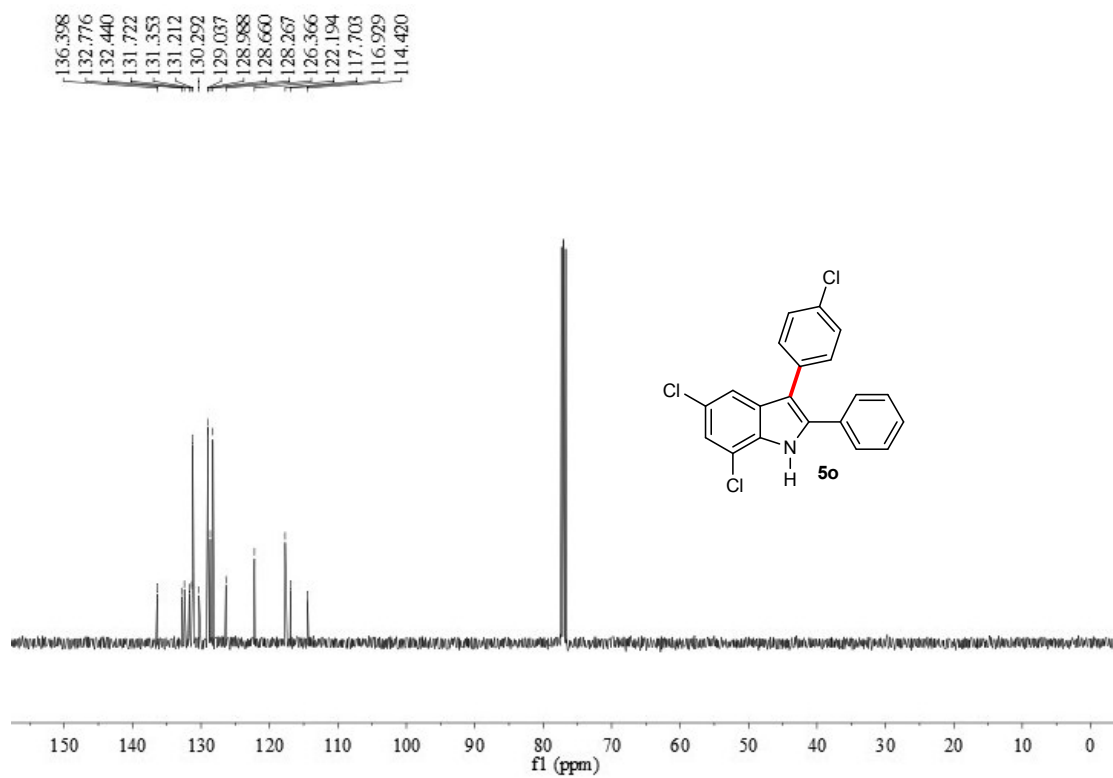

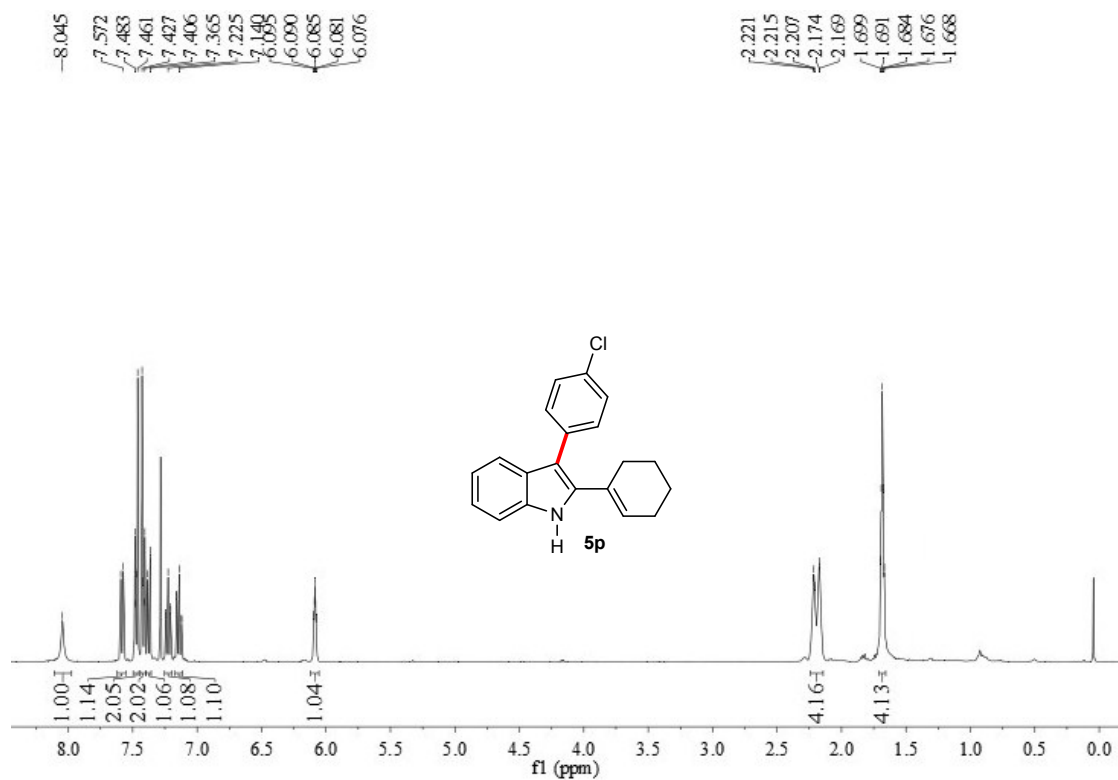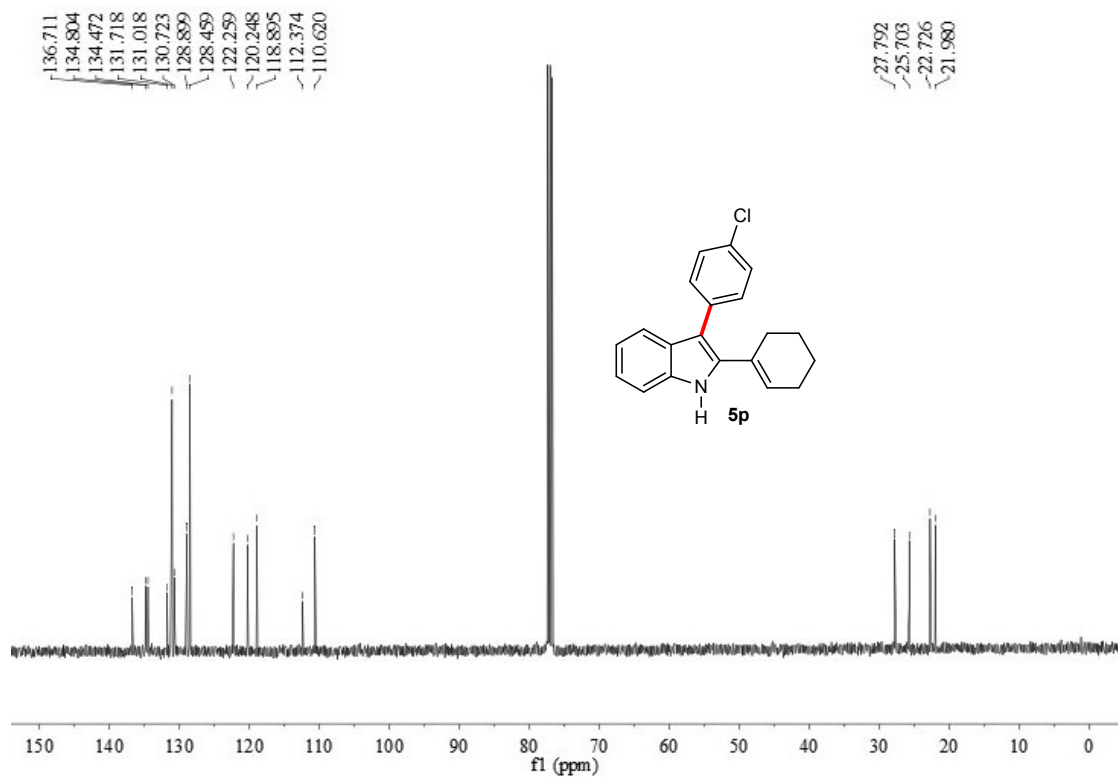

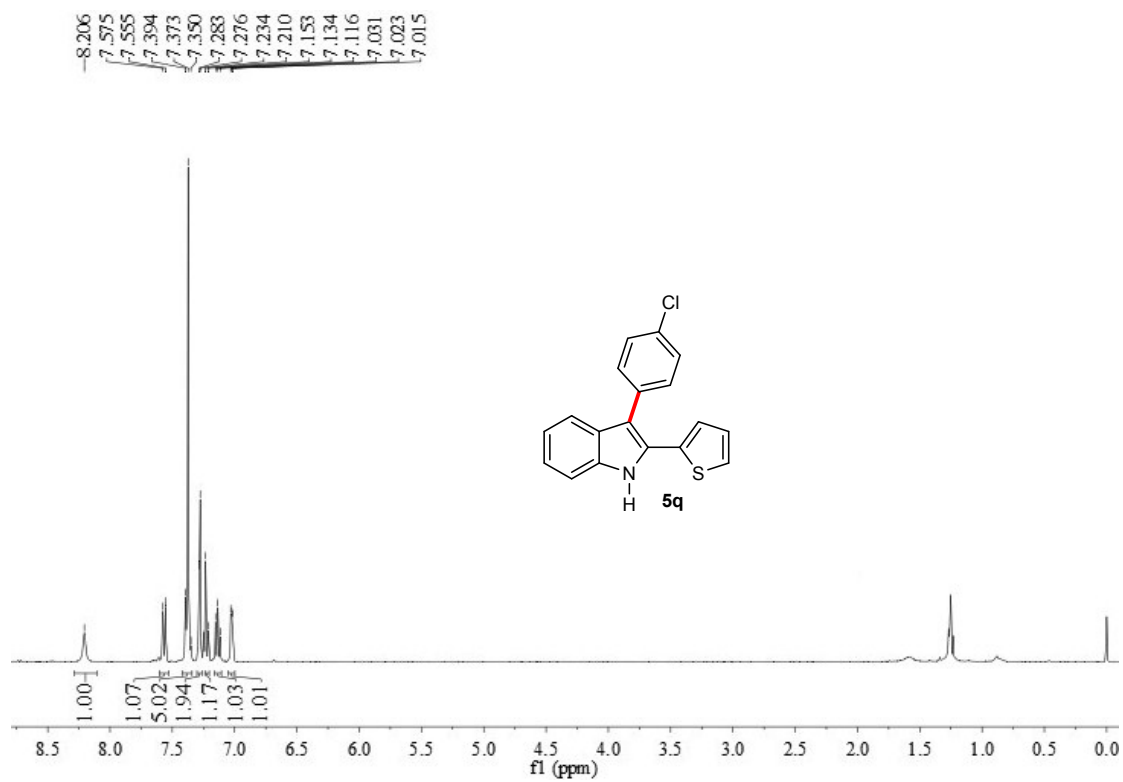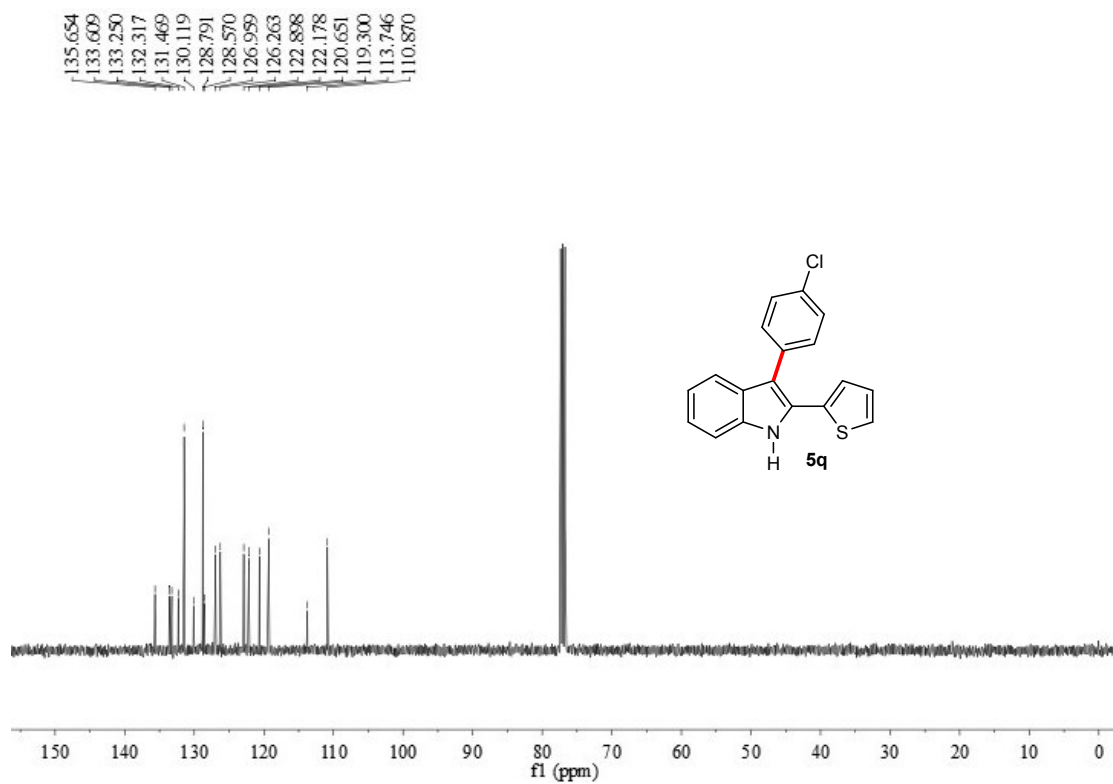

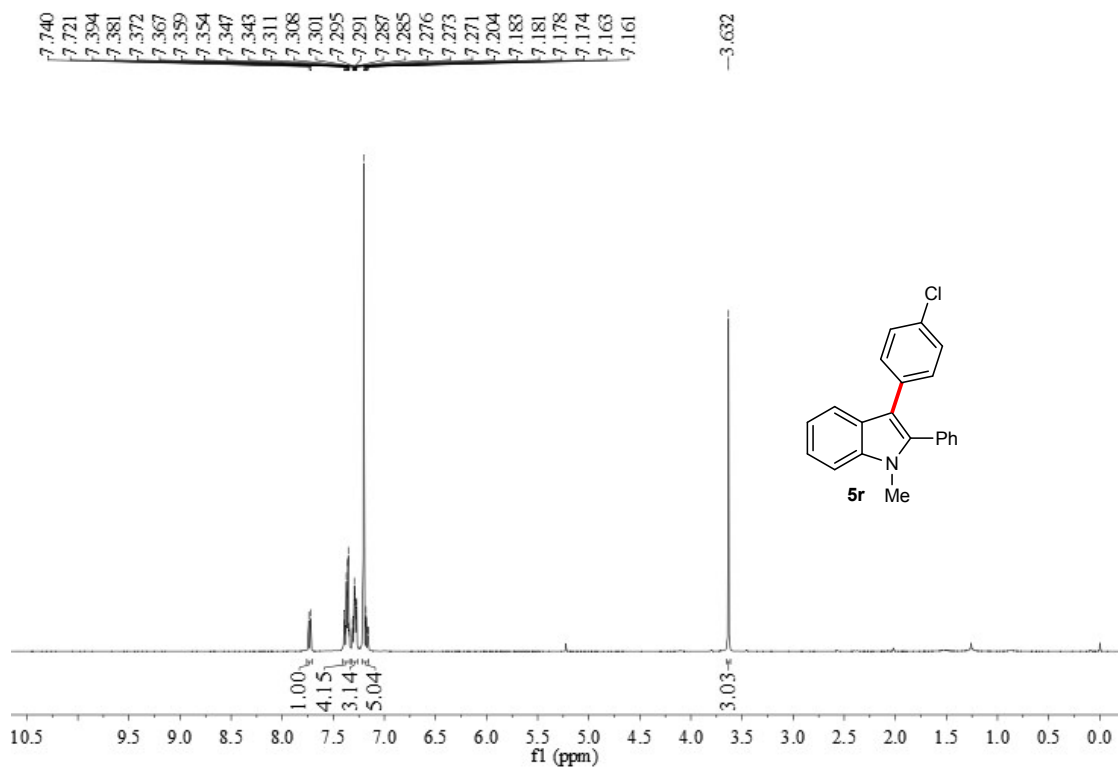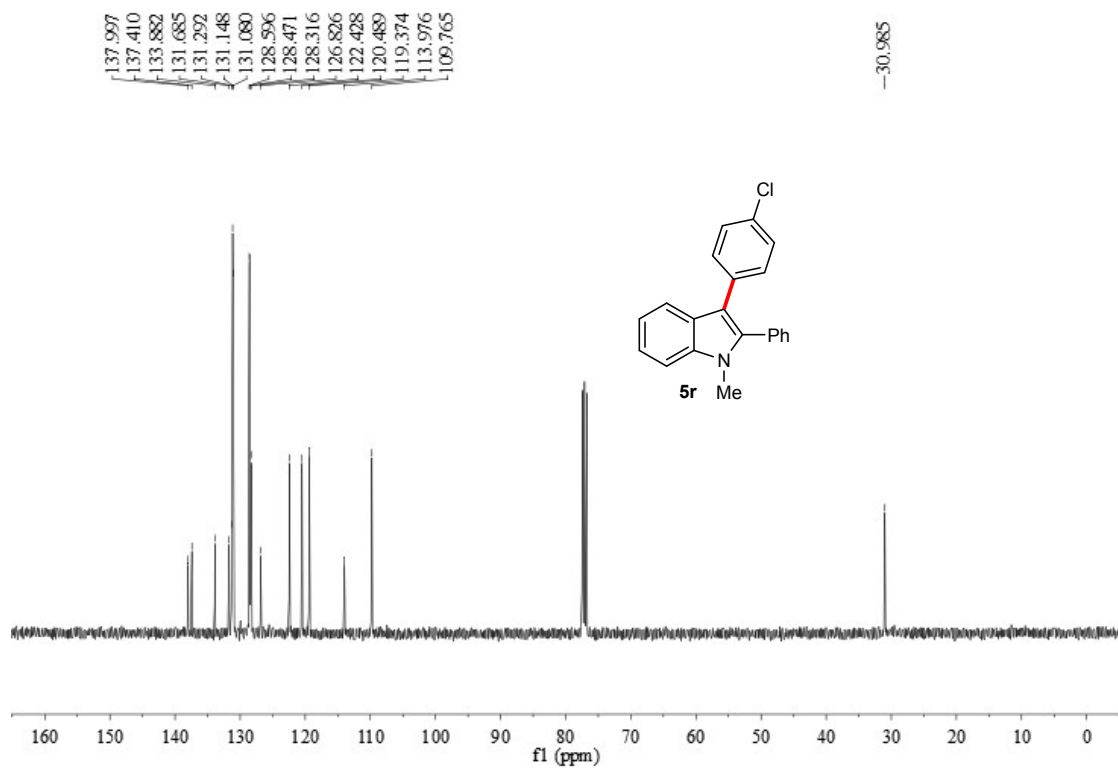

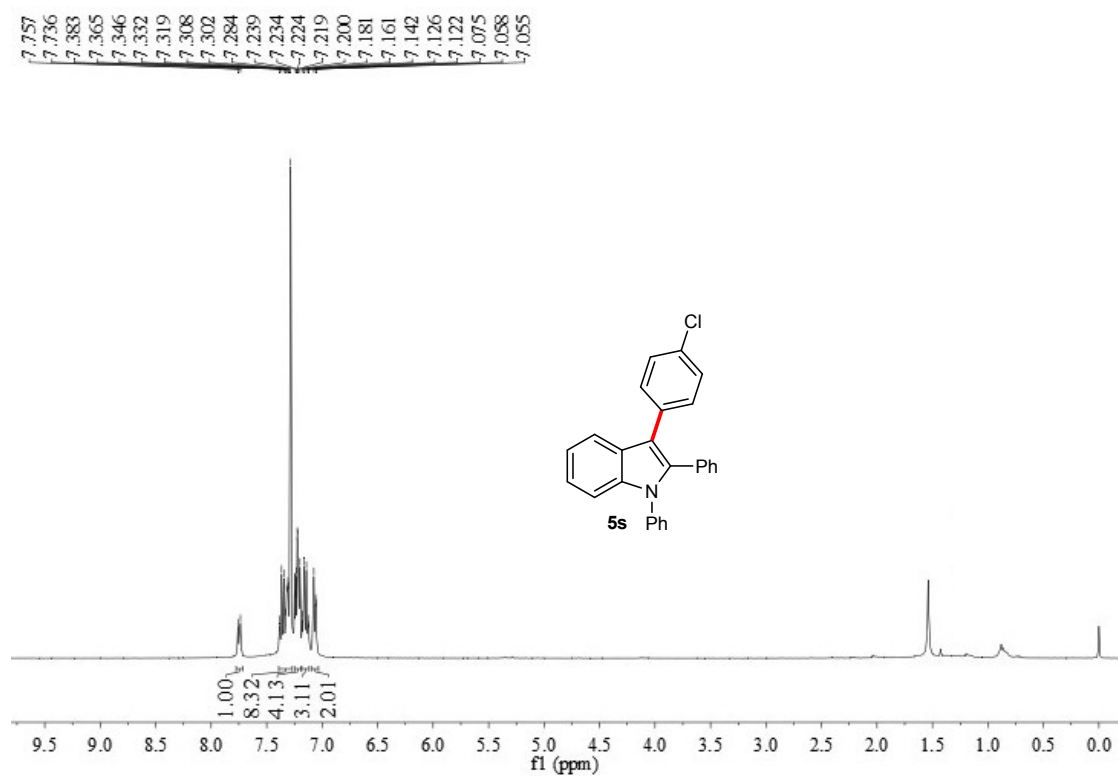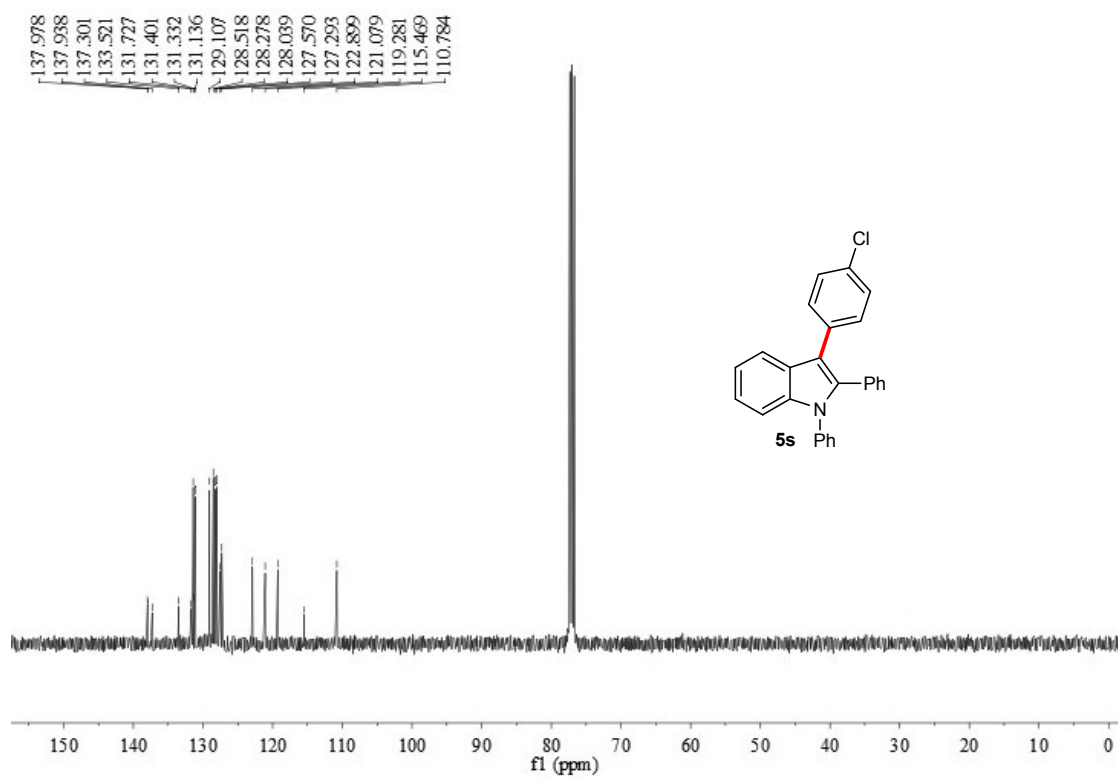

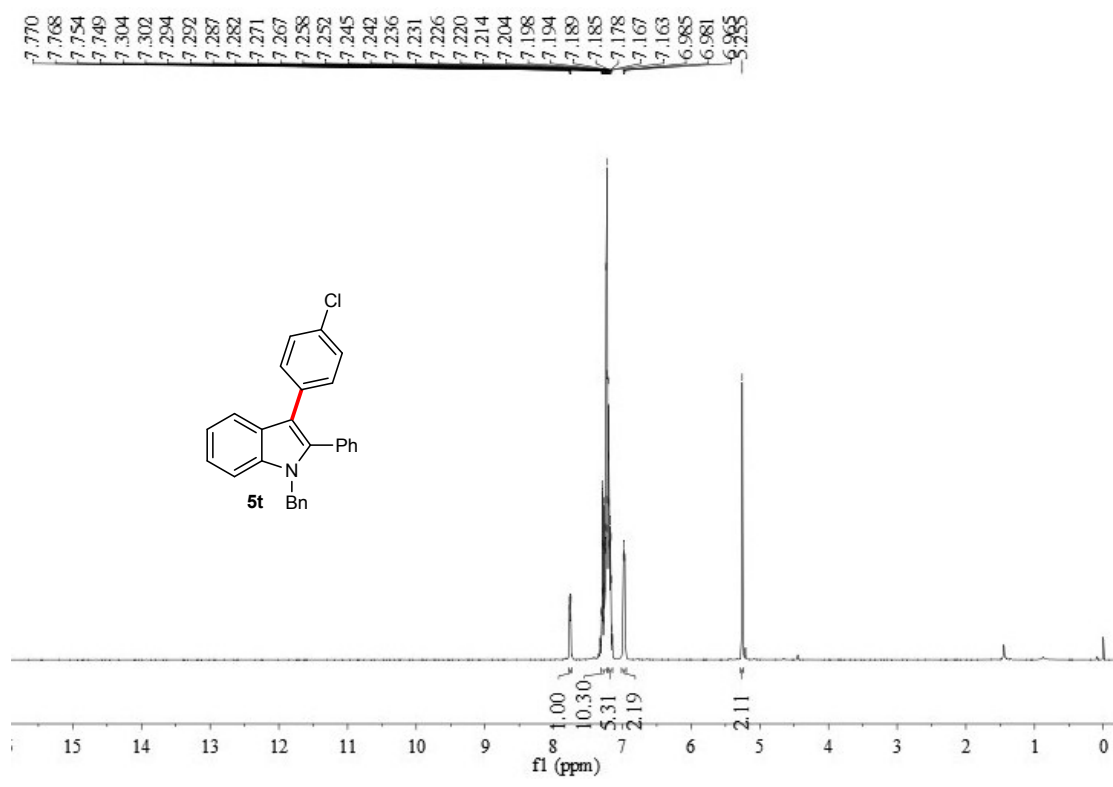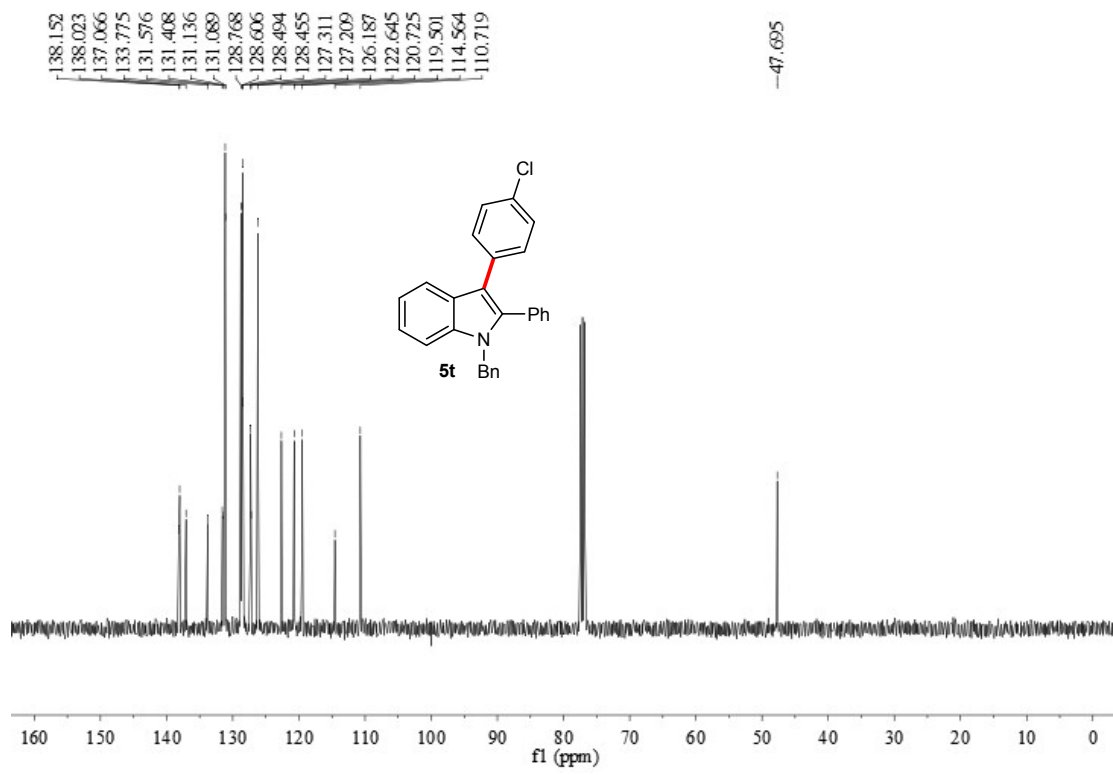

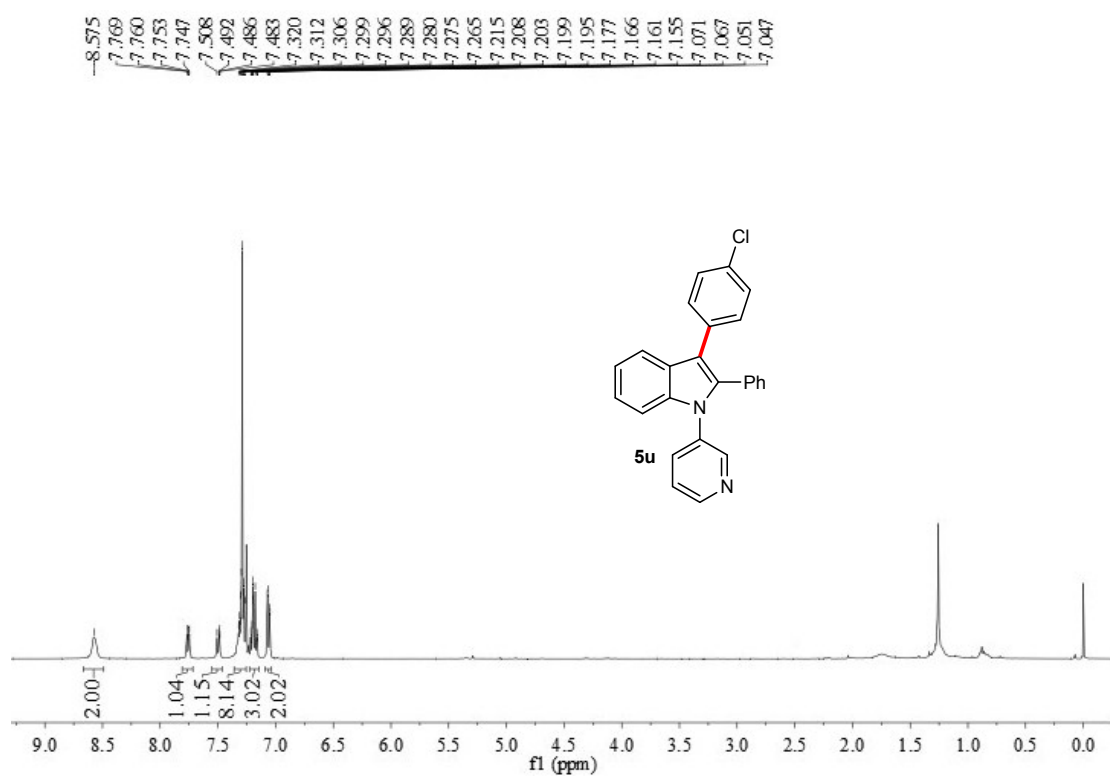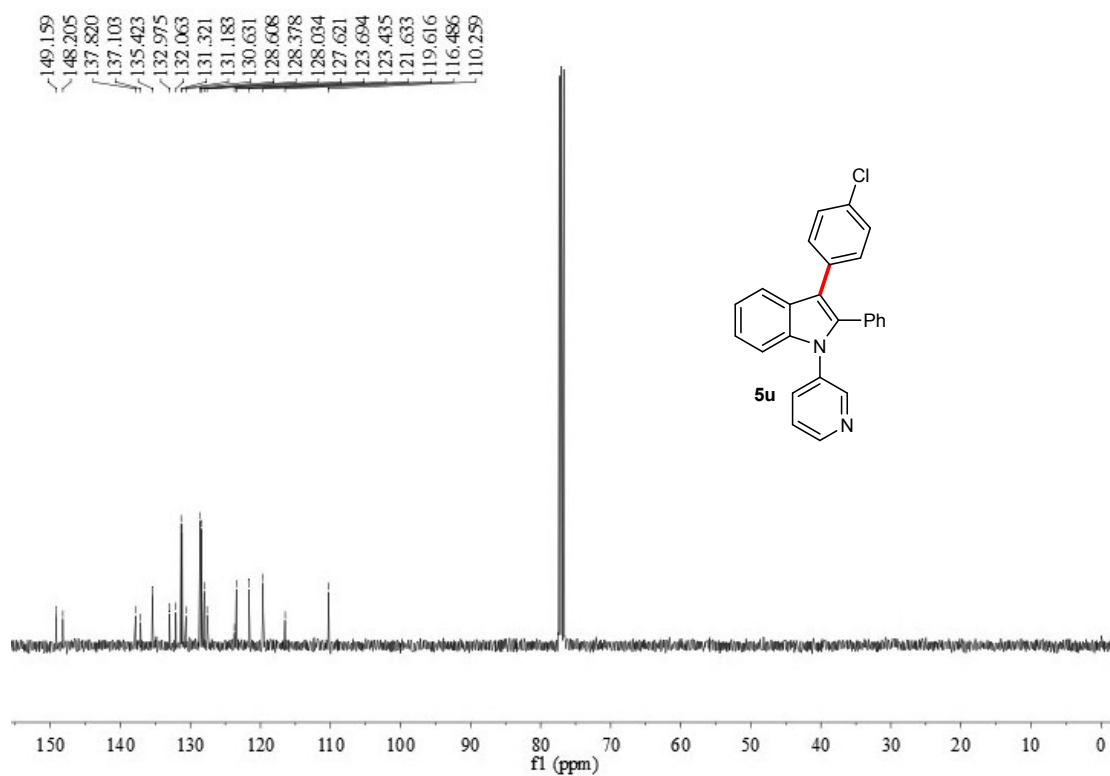



**<sup>1</sup>H and <sup>13</sup>C NMR spectra of compounds 12**

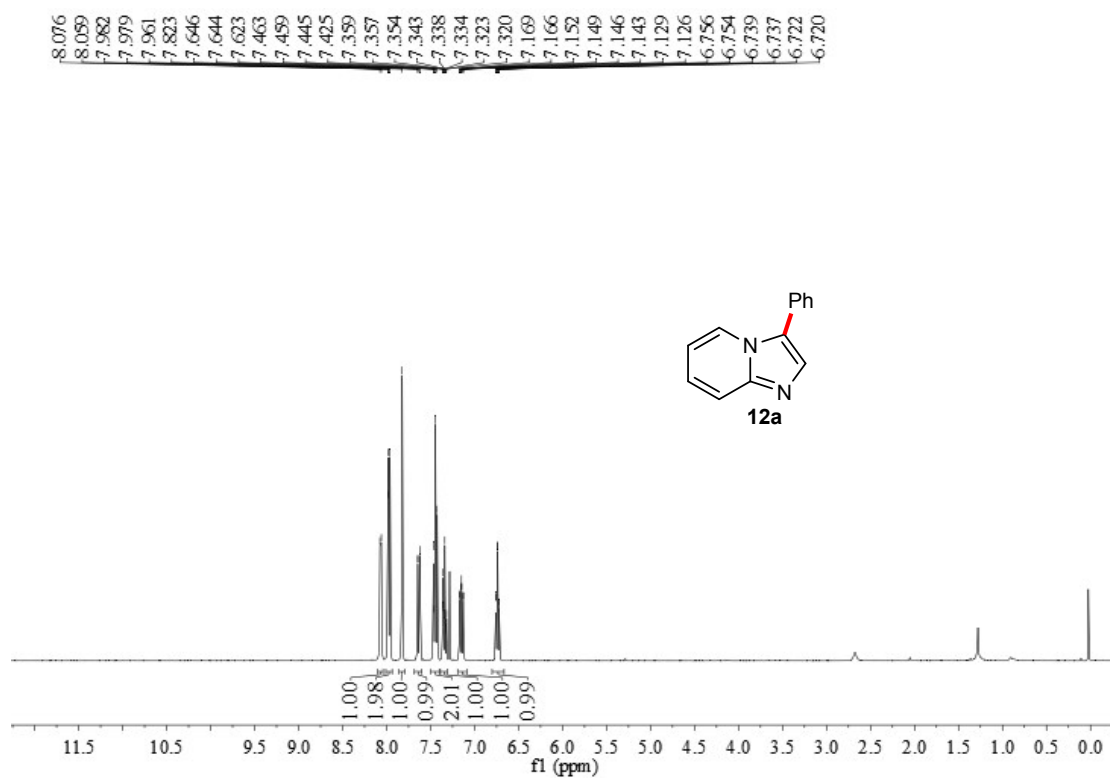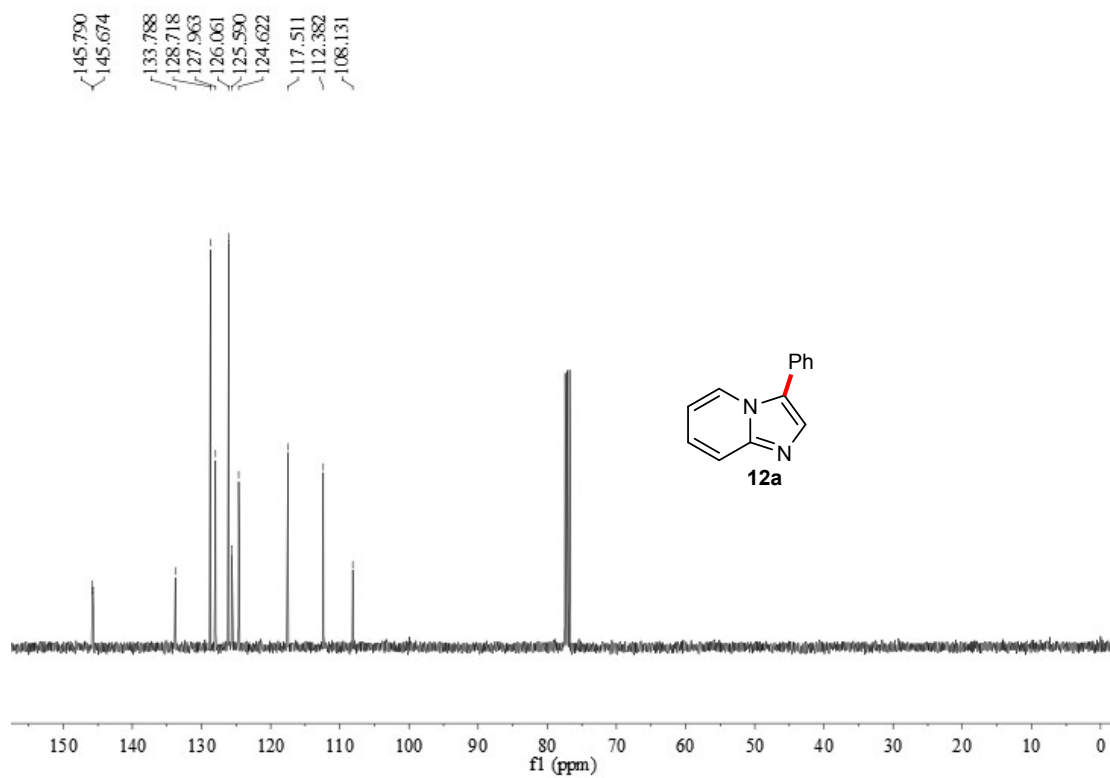

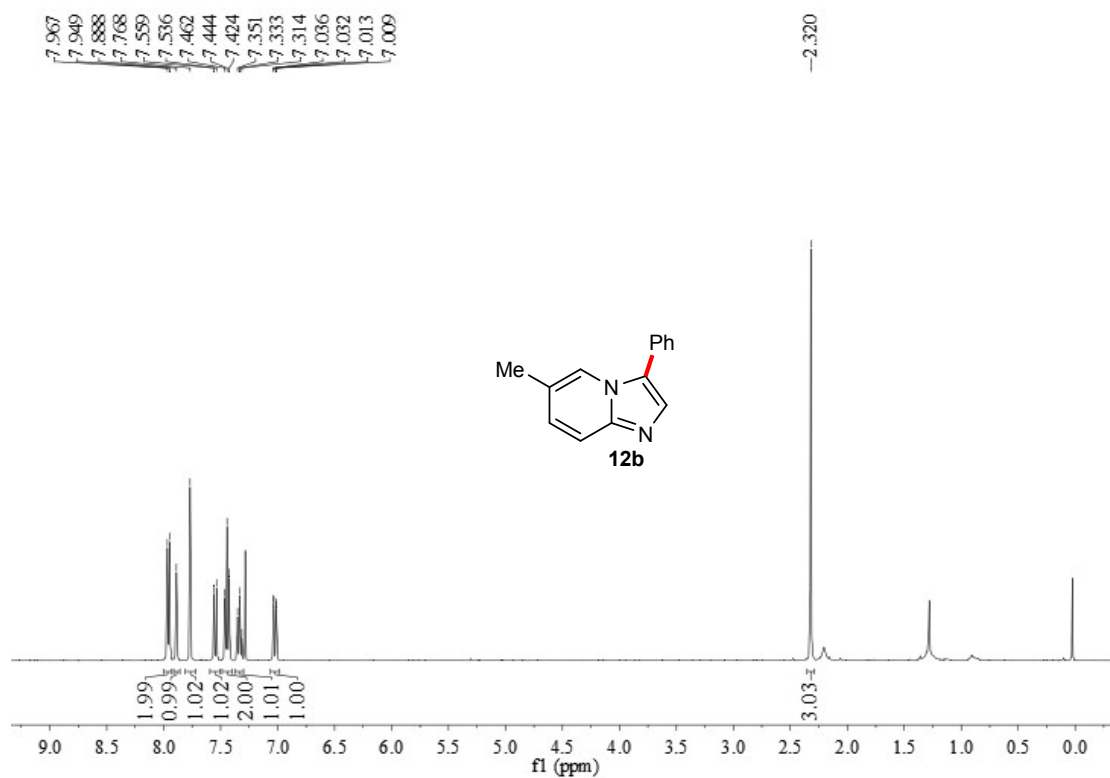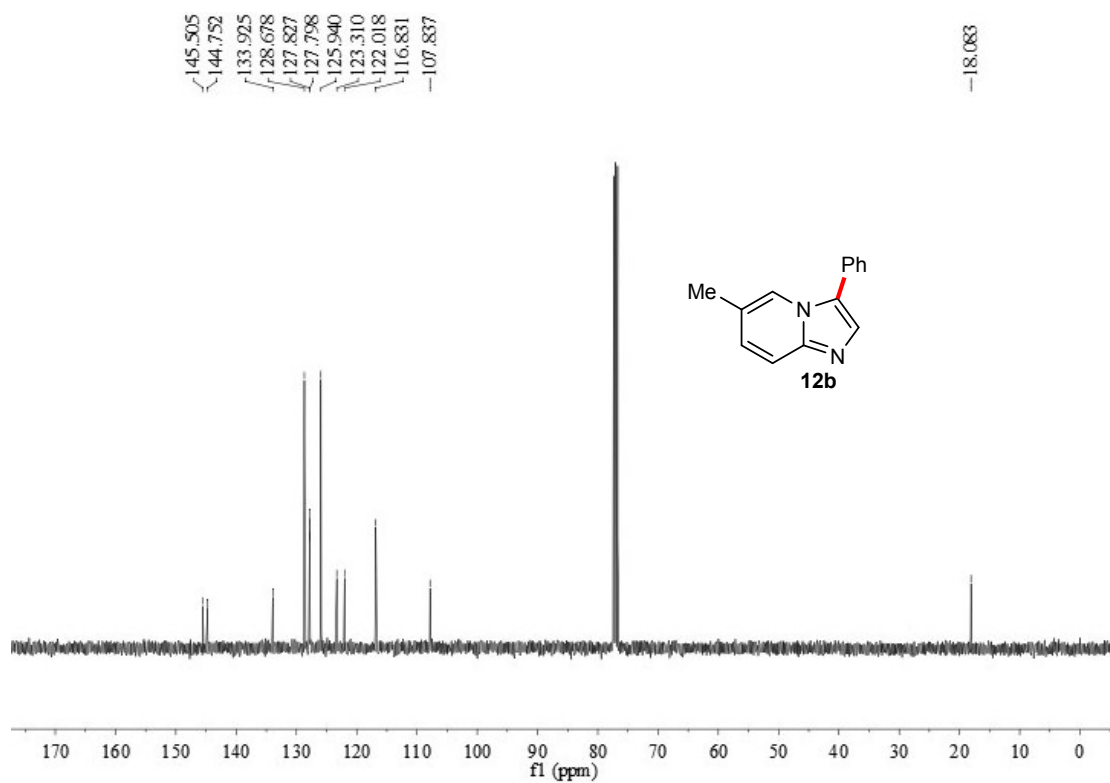

Supplement: c7qo00215g1.pdf [file c7qo00215g1.pdf]
